# Supplementary material
Source: MDPI journal article supplement (https://www.mdpi.com/1424-2818/14/7/576)
Supplement: s1 [file s1]

# **The biodiversity of calcaxonian octocorals from the Irish continental slope inferred from multilocus mitochondrial barcoding**

Declan Morrissey <sup>1,\*</sup>, Candice B Untiedt <sup>2</sup>, Karen Croke <sup>1</sup>, Aisling Robinson <sup>1</sup>, Eva Turley <sup>1</sup>, and A Louise Allcock <sup>1</sup>

<sup>1</sup>School of Natural Sciences and Ryan Institute, National University of Ireland Galway, H91 TK33 Galway, Ireland; d.morrissey4@nuigalway.ie

<sup>2</sup>CSIRO Coasts and Oceans Research and School of Natural Sciences Hobart, Tasmania, Australia

\*Correspondence: declanmorrissey4@gmail.com

Table S1. Identifications and location information for all octocorals in this study.

| Voucher number | USNM Number | Haplotype | Subclade / species | Longitude (Decimal degrees) | Latitude (Decimal degrees) | Depth (m) |
|----------------|-------------|-----------|--------------------|-----------------------------|----------------------------|-----------|
| CE-17-266      | 1593468     | 1         | D1                 | -10.682                     | 48.6151                    | 1787      |
| CE-17-597      | 1593469     | 1         | D1                 | -9.9423                     | 48.5734                    | 1729      |
| CE-18-404      | 1593470     | 1         | D1                 | -11.891                     | 54.2208                    | 1716      |
| CE-18-435      | 1593471     | 1         | D1                 | -11.95                      | 54.1764                    | 1395      |
| CE-18-509      | 1593472     | 1         | D1                 | -12.25                      | 54.1342                    | 1509      |
| CE-18-646      | 1593473     | 1         | D1                 | -12.556                     | 54.0638                    | 1418      |
| CE-18-508      | 1593474     | 2         | D1                 | -12.25                      | 54.1341                    | 1509      |
| CE-17-269      | 1593475     | 3         | B1                 | -10.682                     | 48.6149                    | 1753      |
| CE-17-174      | 1593476     | 4         | B1                 | -11.048                     | 48.8303                    | 1489      |
| CE-17-206      | 1593477     | 5         | B1                 | -10.681                     | 48.6168                    | 2080      |
| CE-17-550      | 1593478     | 5         | B1                 | -9.9416                     | 48.5741                    | 1804      |
| CE-18-126      | 1593479     | 5         | B1                 | -12.475                     | 54.116                     | 1777      |
| CE-18-409      | 1593480     | 5         | B1                 | -11.898                     | 54.2236                    | 1784      |
| CE-17-146      | 1593481     | 6         | B1                 | -11.048                     | 48.8302                    | 1468      |
| CE-17-163      | 1593482     | 6         | B1                 | -11.048                     | 48.8301                    | 1463      |
| CE-17-424      | 1593483     | 6         | B1                 | -10.037                     | 48.6532                    | 1298      |
| CE-17-433      | 1593484     | 6         | B1                 | -10.037                     | 48.6532                    | 1308      |
| CE-17-490      | 1593485     | 6         | B1                 | -10.036                     | 48.6523                    | 1309      |
| CE-17-496      | 1593486     | 6         | B1                 | -10.036                     | 48.6521                    | 1303      |
| CE-17-501      | 1593487     | 6         | B1                 | -10.036                     | 48.6523                    | 1318      |
| CE-18-244      | 1593488     | 6         | B1                 | -10.783                     | 54.6626                    | 1300      |
| CE-17-201      | 1593489     | 7         | D2                 | -10.681                     | 48.6163                    | 1997      |
| CE-18-129      | 1593490     | 8         | D2                 | -12.475                     | 54.116                     | 1791      |
| CE-18-132      | 1593491     | 8         | D2                 | -12.476                     | 54.1161                    | 1766      |
| CE-18-387      | 1593492     | 8         | D2                 | -11.888                     | 54.2204                    | 1679      |
| CE-18-288      | 1593493     | 9         | D2                 | -10.783                     | 54.6626                    | 1296      |
| CE-18-222      | 1593494     | 10        | D2                 | -10.783                     | 54.6626                    | 1300      |
| CE-18-039      | 1593495     | 11        | D2                 | -13.905                     | 54.0686                    | 2118      |
| CE-18-197      | 1593496     | 12        | I1                 | -10.681                     | 48.6163                    | 2031      |
| CE-18-203      | 1593497     | 12        | I1                 | -10.681                     | 48.6165                    | 2054      |
| CE-17-234      | 1593498     | 13        | I1                 | -10.681                     | 48.6154                    | 1852      |
| CE-18-063      | 1593499     | 13        | I1                 | -12.547                     | 54.0611                    | 1288      |
| CE-18-415      | 1593500     | 13        | I1                 | -11.897                     | 54.2234                    | 1774      |
| CE-18-058      | 1593501     | 14        | I1                 | -12.548                     | 54.0611                    | 1290      |
| CE-18-067      | 1593502     | 14        | I1                 | -12.548                     | 54.0611                    | 1290      |
| CE-18-110      | 1593503     | 14        | I1                 | -12.55                      | 54.0617                    | 1311      |
| CE-18-111      | 1593504     | 14        | I1                 | -12.55                      | 54.0617                    | 1312      |
| CE-18-113      | 1593505     | 14        | I1                 | -12.55                      | 54.0617                    | 1312      |
| CE-18-639      | 1593506     | 14        | I1                 | -12.558                     | 54.0631                    | 1483      |
| CE-18-658      | 1593507     | 14        | I1                 | -12.558                     | 54.0631                    | 149       |
| CE-18-661      | 1593508     | 14        | I1                 | -12.554                     | 54.0648                    | 1323      |
| CE-17-125      | 1593509     | 15        | I1                 | -11.048                     | 48.83                      | 1473      |
| CE-17-511      | 1593510     | 15        | I1                 | -10.036                     | 48.6523                    | 1314      |
| CE-17-233      | 1593511     | 16        | C1                 | -10.682                     | 48.615                     | 1834      |
| CE-17-287      | 1593512     | 16        | C1                 | -10.681                     | 48.615                     | 1745      |
| CE-18-143      | 1593513     | 16        | C1                 | -12.474                     | 54.116                     | 1817      |
| CE-18-242      | 1593514     | 16        | C1                 | -10.784                     | 54.6627                    | 1292      |
| CE-18-456      | 1593515     | 16        | C1                 | -11.945                     | 54.1783                    | 1532      |
| CE-17-356      | 1593516     | 17        | C1                 | -10.68                      | 48.6152                    | 1591      |
| CE-17-276      | 1593517     | 18        | J3                 | -10.681                     | 48.615                     | 1695      |
| CE-17-274      | 1593518     | 19        | J3                 | -10.681                     | 48.615                     | 1678      |

|           |         |    |                                |            |            |        |
|-----------|---------|----|--------------------------------|------------|------------|--------|
| CE-17-284 | 1593519 | 19 | J3                             | -10.681    | 48.615     | 1695   |
| CE-17-289 | 1593520 | 19 | J3                             | -10.681    | 48.615     | 1653   |
| CE-17-348 | 1593521 | 19 | J3                             | -10.68     | 48.6154    | 1599   |
| CE-17-384 | 1593522 | 19 | J3                             | -10.68     | 48.6154    | 1613   |
| CE-18-088 | 1593523 | 19 | J3                             | -12.551    | 54.0611    | 1361   |
| CE-18-538 | 1593524 | 19 | J3                             | -12.403    | 54.0602    | 1397   |
| CE-18-653 | 1593525 | 19 | J3                             | -12.555    | 54.0643    | 1374   |
| CE-17-367 | 1593526 | 20 | J3                             | -10.68     | 48.6154    | 1599   |
| CE-17-205 | 1593527 | 21 | A1                             | -10.681    | 48.6162    | 1980   |
| CE-17-217 | 1593528 | 21 | A1                             | -10.681    | 48.6159    | 1970   |
| CE-17-229 | 1593529 | 21 | A1                             | -10.682    | 48.6149    | 1834   |
| CE-17-248 | 1593530 | 21 | A1                             | ~ -10.682* | ~ 48.6150* | ~1800* |
| CE-17-304 | 1593531 | 21 | A1                             | -10.682    | 48.6148    | 1780   |
| CE-17-425 | 1593532 | 21 | A1                             | -10.037    | 48.6532    | 1287   |
| CE-17-449 | 1593533 | 21 | A1                             | -10.037    | 48.6532    | 1291   |
| CE-18-247 | 1593534 | 21 | A1                             | -10.784    | 54.6626    | 1294   |
| CE-17-357 | 1593535 | 21 | A1                             | -10.68     | 48.6152    | 1589   |
| CE-18-339 | 1593536 | 22 | A1                             | -11.581    | 54.2601    | 821    |
| CE-17-216 | 1593537 | 23 | F1                             | -10.681    | 48.6159    | 1971   |
| CE-17-181 | 1593580 | 24 | <i>Chelidonisis aurantiaca</i> | -11.049    | 48.8495    | 1507   |
| CE-17-364 | 1593538 | 25 | <i>Chrysogorgia</i> Group 7    | -10.6795   | 48.6153    | 1599   |
| CE-17-271 | 1593539 | 26 | <i>Chrysogorgia</i> Group 7    | -10.6806   | 48.6150    | 1657   |
| CE-17-087 | 1593540 | 27 | <i>Chrysogorgia</i> Group 3    | -11.0477   | 48.8306    | 1493   |
| CE-17-093 | 1593541 | 27 | <i>Chrysogorgia</i> Group 3    | -11.0482   | 48.8301    | 1460   |
| CE-17-124 | 1593542 | 27 | <i>Chrysogorgia</i> Group 3    | -11.048    | 48.8302    | 1489   |
| CE-17-129 | 1593543 | 27 | <i>Chrysogorgia</i> Group 3    | -11.0483   | 48.8298    | 1498   |
| CE-17-142 | 1593544 | 27 | <i>Chrysogorgia</i> Group 3    | -11.0482   | 48.8299    | 1496   |
| CE-17-283 | 1593545 | 27 | <i>Chrysogorgia</i> Group 3    | -10.6806   | 48.6150    | 1658   |
| CE-18-229 | 1593546 | 27 | <i>Chrysogorgia</i> Group 3    | -10.7831   | 54.6626    | 1301   |
| CE-18-289 | 1593547 | 27 | <i>Chrysogorgia</i> Group 3    | -10.7832   | 54.6627    | 1292   |
| CE-18-292 | 1593548 | 27 | <i>Chrysogorgia</i> Group 3    | -10.7837   | 54.663     | 1299   |
| CE-18-631 | 1593549 | 27 | <i>Chrysogorgia</i> Group 3    | -12.5564   | 54.0636    | 1439   |
| CE-18-154 | 1593550 | 28 | <i>Dasygorgia</i>              | -12.4747   | 54.1161    | 1787   |
| CE-18-418 | 1593551 | 28 | <i>Dasygorgia</i>              | -11.8957   | 54.2227    | 1772   |
| CE-18-419 | 1593552 | 28 | <i>Dasygorgia</i>              | -11.8947   | 54.2225    | 1774   |
| CE-17-388 | 1593553 | 29 | <i>Chrysogorgia</i> Group 1    | -10.6796*  | 48.6156*   | ~1600* |
| CE-18-237 | 1593554 | 29 | <i>Chrysogorgia</i> Group 1    | -10.7835   | 54.6627    | 1296   |
| CE-18-248 | 1593555 | 29 | <i>Chrysogorgia</i> Group 1    | -10.7837   | 54.6626    | 1294   |

|            |         |    |                                        |          |          |      |
|------------|---------|----|----------------------------------------|----------|----------|------|
| CE-18-295  | 1593556 | 29 | <i>Chrysogorgia</i><br>Group 1         | -10.7833 | 54.6626  | 1298 |
| CE-18-632a | 1593557 | 29 | <i>Chrysogorgia</i><br>Group 1         | -12.556  | 54.0638  | 1418 |
| CE-18-434  | 1593558 | 30 | <i>Narella bellissima</i>              | -11.9516 | 54.1756  | 1348 |
| CE-17-290  | 1593559 | 31 | <i>Candidella</i><br><i>imbricata</i>  | -10.6796 | 48.6153  | 1591 |
| CE-17-305  | 1593560 | 31 | <i>Candidella</i><br><i>imbricata</i>  | -10.6796 | 48.6153  | 1591 |
| CE-17-340  | 1593561 | 31 | <i>Candidella</i><br><i>imbricata</i>  | -10.6797 | 48.6149  | 1594 |
| CE-17-346  | 1593562 | 31 | <i>Candidella</i><br><i>imbricata</i>  | -10.6795 | 48.6152  | 1589 |
| CE-17-352  | 1593563 | 31 | <i>Candidella</i><br><i>imbricata</i>  | -10.6796 | 48.6152  | 1591 |
| CE-18-321  | 1593564 | 32 | <i>Narella versluysi</i>               | -11.5757 | 54.2625  | 907  |
| CE-17-081  | 1593565 | 33 | <i>Primnoa</i> sp.                     | -11.0478 | 48.8308  | 1482 |
| CE-17-095  | 1593566 | 33 | <i>Primnoa</i> sp.                     | -11.0476 | 48.8309  | 1490 |
| CE-17-160  | 1593567 | 34 | <i>Primnoa</i> sp.                     | -11.0487 | 48.8291  | 1514 |
| CE-17-082  | 1593568 | 35 | <i>Primnoa</i> sp.                     | -11.0478 | 48.831   | 1490 |
| CE-17-169  | 1593569 | 35 | <i>Primnoa</i> sp.                     | -11.0486 | 48.8294  | 1508 |
| CE-17-084  | 1593570 | 36 | <i>Primnoa</i> sp.                     | -11.0477 | 48.8306  | 1493 |
| CE-17-090  | 1593571 | 36 | <i>Primnoa</i> sp.                     | -11.0478 | 48.8308  | 1489 |
| CE-17-101  | 1593572 | 36 | <i>Primnoa</i> sp.                     | -11.0478 | 48.8308  | 1482 |
| CE-17-102  | 1593573 | 36 | <i>Primnoa</i> sp.                     | -11.0477 | 48.83083 | 1491 |
| CE-18-261  | 1593574 | 37 | <i>Thouarella</i><br><i>grasshoffi</i> | -10.7835 | 54.6625  | 1291 |
| CE-18-272  | 1593575 | 37 | <i>Thouarella</i><br><i>grasshoffi</i> | -10.7834 | 54.6626  | 1295 |
| CE-18-278  | 1593576 | 37 | <i>Thouarella</i><br><i>grasshoffi</i> | -10.7837 | 54.6628  | 1297 |
| CE-18-441  | 1593577 | 37 | <i>Thouarella</i><br><i>grasshoffi</i> | -11.9517 | 54.1756  | 1345 |
| CE-18-577  | 1593578 | 37 | <i>Thouarella</i><br><i>grasshoffi</i> | -12.404  | 54.0597  | 1435 |
| CE-18-568  | 1593579 | 38 | <i>Calyptrophora</i><br><i>clinata</i> | -12.4034 | 54.0602  | 1397 |

---

\* Approximate location based on the collection of other specimens collected during the ROV dive. Sample location was not recorded at time of collection.



Table S2. Initial partitions provided to IQ tree and the final merged partitions and corresponding best fit model as determined by PartitionFinder in IQ-Tree.

| Initial partitions                                                                                                                                | Nucleotide number                                                                        |                |
|---------------------------------------------------------------------------------------------------------------------------------------------------|------------------------------------------------------------------------------------------|----------------|
| <i>mtMutS</i> _pos1                                                                                                                               | 1-936\3                                                                                  |                |
| <i>mtMutS</i> _pos2                                                                                                                               | 2-936\3                                                                                  |                |
| <i>mtMutS</i> _pos3                                                                                                                               | 3-936\3                                                                                  |                |
| igr1                                                                                                                                              | 937-1116                                                                                 |                |
| <i>COI</i> _pos1                                                                                                                                  | 1117-1902\3                                                                              |                |
| <i>COI</i> _pos2                                                                                                                                  | 1118-1902\3                                                                              |                |
| <i>COI</i> _pos3                                                                                                                                  | 1119-1902\3                                                                              |                |
| 16S rRNA                                                                                                                                          | 1903-2112                                                                                |                |
| <i>NAD2</i> _pos1                                                                                                                                 | 2113-2688\3                                                                              |                |
| <i>NAD2</i> _pos2                                                                                                                                 | 2114-2688\3                                                                              |                |
| <i>NAD2</i> _pos3                                                                                                                                 | 2115-2688\3                                                                              |                |
| igr4                                                                                                                                              | 2689-3390                                                                                |                |
| Partitions selected by Partition Finder in IQ-Tree                                                                                                | Nucleotide number                                                                        | Model selected |
| <i>mtMutS</i> _pos1, <i>mtMutS</i> _pos2, <i>mtMutS</i> _pos3, <i>COI</i> _pos1, <i>COI</i> _pos3, 16S rRNA, <i>NAD2</i> _pos1, <i>NAD2</i> _pos3 | 1-936\3, 2-936\3, 3-936\3, 1117-1902\3, 1119-1902\3, 1903-2112, 2113-2688\3, 2115-2688\3 | TVM+F+R2       |
| igr1, igr4                                                                                                                                        | 937-1116, 2689-3390                                                                      | HKY+F+I        |
| <i>COI</i> _pos2, <i>NAD2</i> _pos2                                                                                                               | 1118-1902\3, 2114-2688\3                                                                 | HKY+F+I        |

Table S3. Haplotype membership of each octocoral using each genetic fragment individually, and for the concatenated sequence of all four regions (Combo). Boxes with the same number indicate that those corals share the same haplotype at the specific marker.

| Voucher Number | Family         | ID | Combo | <i>mtMutS</i> | <i>COI</i> + <i>igr1</i> | <i>16S</i> - <i>NAD2</i> | <i>igr4</i> |
|----------------|----------------|----|-------|---------------|--------------------------|--------------------------|-------------|
| CE-17-266      | Keratoisididae | D1 | 1     | 1             | 1                        | 9                        | 4           |
| CE-17-597      | Keratoisididae | D1 | 1     | 1             | 1                        | 9                        | 4           |
| CE-18-404      | Keratoisididae | D1 | 1     | 1             | 1                        | 9                        | 4           |
| CE-18-435      | Keratoisididae | D1 | 1     | 1             | 1                        | 9                        | 4           |
| CE-18-509      | Keratoisididae | D1 | 1     | 1             | 1                        | 9                        | 4           |
| CE-18-646      | Keratoisididae | D1 | 1     | 1             | 1                        | 9                        | 4           |
| CE-18-508      | Keratoisididae | D1 | 2     | 1             | 2                        | 9                        | 4           |
| CE-17-269      | Keratoisididae | B1 | 3     | 2             | 9                        | 6                        | 3           |
| CE-17-174      | Keratoisididae | B1 | 4     | 2             | 10                       | 5                        | 14          |
| CE-17-206      | Keratoisididae | B1 | 5     | 2             | 10                       | 7                        | 14          |
| CE-17-550      | Keratoisididae | B1 | 5     | 2             | 10                       | 7                        | 14          |
| CE-18-126      | Keratoisididae | B1 | 5     | 2             | 10                       | 7                        | 14          |
| CE-18-409      | Keratoisididae | B1 | 5     | 2             | 10                       | 7                        | 14          |
| CE-17-146      | Keratoisididae | B1 | 6     | 2             | 10                       | 5                        | 13          |
| CE-17-163      | Keratoisididae | B1 | 6     | 2             | 10                       | 5                        | 13          |
| CE-17-424      | Keratoisididae | B1 | 6     | 2             | 10                       | 5                        | 13          |
| CE-17-433      | Keratoisididae | B1 | 6     | 2             | 10                       | 5                        | 13          |
| CE-17-490      | Keratoisididae | B1 | 6     | 2             | 10                       | 5                        | 13          |
| CE-17-496      | Keratoisididae | B1 | 6     | 2             | 10                       | 5                        | 13          |
| CE-17-501      | Keratoisididae | B1 | 6     | 2             | 10                       | 5                        | 13          |
| CE-18-244      | Keratoisididae | B1 | 6     | 2             | 10                       | 5                        | 13          |
| CE-17-201      | Keratoisididae | D2 | 7     | 3             | 1                        | 10                       | 5           |
| CE-18-129      | Keratoisididae | D2 | 8     | 3             | 1                        | 10                       | 6           |
| CE-18-132      | Keratoisididae | D2 | 8     | 3             | 1                        | 10                       | 6           |
| CE-18-387      | Keratoisididae | D2 | 8     | 3             | 1                        | 10                       | 6           |
| CE-18-288      | Keratoisididae | D2 | 9     | 4             | 1                        | 11                       | 7           |
| CE-18-222      | Keratoisididae | D2 | 10    | 4             | 1                        | 10                       | 7           |

|           |                |    |    |    |    |    |    |
|-----------|----------------|----|----|----|----|----|----|
| CE-18-039 | Keratoisididae | D2 | 11 | 4  | 11 | 8  | 7  |
| CE-18-197 | Keratoisididae | I1 | 12 | 5  | 2  | 1  | 9  |
| CE-18-203 | Keratoisididae | I1 | 12 | 5  | 2  | 1  | 9  |
| CE-17-234 | Keratoisididae | I1 | 13 | 6  | 2  | 2  | 9  |
| CE-18-063 | Keratoisididae | I1 | 13 | 6  | 2  | 2  | 9  |
| CE-18-415 | Keratoisididae | I1 | 13 | 6  | 2  | 2  | 9  |
| CE-18-058 | Keratoisididae | I1 | 14 | 7  | 2  | 2  | 9  |
| CE-18-067 | Keratoisididae | I1 | 14 | 7  | 2  | 2  | 9  |
| CE-18-110 | Keratoisididae | I1 | 14 | 7  | 2  | 2  | 9  |
| CE-18-111 | Keratoisididae | I1 | 14 | 7  | 2  | 2  | 9  |
| CE-18-113 | Keratoisididae | I1 | 14 | 7  | 2  | 2  | 9  |
| CE-18-639 | Keratoisididae | I1 | 14 | 7  | 2  | 2  | 9  |
| CE-18-658 | Keratoisididae | I1 | 14 | 7  | 2  | 2  | 9  |
| CE-18-661 | Keratoisididae | I1 | 14 | 7  | 2  | 2  | 9  |
| CE-17-125 | Keratoisididae | I1 | 15 | 8  | 2  | 15 | 10 |
| CE-17-511 | Keratoisididae | I1 | 15 | 8  | 2  | 15 | 10 |
| CE-17-233 | Keratoisididae | C1 | 16 | 9  | 4  | 4  | 1  |
| CE-17-287 | Keratoisididae | C1 | 16 | 9  | 4  | 4  | 1  |
| CE-18-143 | Keratoisididae | C1 | 16 | 9  | 4  | 4  | 1  |
| CE-18-242 | Keratoisididae | C1 | 16 | 9  | 4  | 4  | 1  |
| CE-18-456 | Keratoisididae | C1 | 16 | 9  | 4  | 4  | 1  |
| CE-17-356 | Keratoisididae | C1 | 17 | 9  | 4  | 4  | 17 |
| CE-17-276 | Keratoisididae | J3 | 18 | 10 | 3  | 3  | 15 |
| CE-17-274 | Keratoisididae | J3 | 19 | 10 | 3  | 3  | 12 |
| CE-17-284 | Keratoisididae | J3 | 19 | 10 | 3  | 3  | 12 |
| CE-17-289 | Keratoisididae | J3 | 19 | 10 | 3  | 3  | 12 |
| CE-17-348 | Keratoisididae | J3 | 19 | 10 | 3  | 3  | 12 |
| CE-17-384 | Keratoisididae | J3 | 19 | 10 | 3  | 3  | 12 |
| CE-18-088 | Keratoisididae | J3 | 19 | 10 | 3  | 3  | 12 |
| CE-18-538 | Keratoisididae | J3 | 19 | 10 | 3  | 3  | 12 |

|           |                  |                                |    |    |    |    |    |
|-----------|------------------|--------------------------------|----|----|----|----|----|
| CE-18-653 | Keratoisididae   | J3                             | 19 | 10 | 3  | 3  | 12 |
| CE-17-367 | Keratoisididae   | J3                             | 20 | 10 | 6  | 3  | 12 |
| CE-17-205 | Keratoisididae   | A1                             | 21 | 11 | 6  | 13 | 2  |
| CE-17-217 | Keratoisididae   | A1                             | 21 | 11 | 6  | 13 | 2  |
| CE-17-229 | Keratoisididae   | A1                             | 21 | 11 | 6  | 13 | 2  |
| CE-17-248 | Keratoisididae   | A1                             | 21 | 11 | 6  | 13 | 2  |
| CE-17-304 | Keratoisididae   | A1                             | 21 | 11 | 6  | 13 | 2  |
| CE-17-425 | Keratoisididae   | A1                             | 21 | 11 | 6  | 13 | 2  |
| CE-17-449 | Keratoisididae   | A1                             | 21 | 11 | 6  | 13 | 2  |
| CE-18-247 | Keratoisididae   | A1                             | 21 | 11 | 6  | 13 | 2  |
| CE-17-357 | Keratoisididae   | A1                             | 21 | 11 | 6  | 13 | 2  |
| CE-18-339 | Keratoisididae   | A1                             | 22 | 12 | 5  | 12 | 8* |
| CE-17-216 | Keratoisididae   | F1                             | 23 | 13 | 8  | 14 | 16 |
| CE-17-181 | Chelidonisididae | <i>Chelidonisis aurantiaca</i> | 24 | 14 | 7  | 16 | 18 |
| CE-17-364 | Chrysogorgiidae  | <i>Chrysogorgia</i> Group 7    | 25 | 15 | 8  | 17 | 19 |
| CE-17-271 | Chrysogorgiidae  | <i>Chrysogorgia</i> Group 7    | 26 | 16 | 9  | 17 | 19 |
| CE-17-087 | Chrysogorgiidae  | <i>Chrysogorgia</i> Group 3    | 27 | 17 | 10 | 18 | 20 |
| CE-17-093 | Chrysogorgiidae  | <i>Chrysogorgia</i> Group 3    | 27 | 17 | 10 | 18 | 20 |
| CE-17-124 | Chrysogorgiidae  | <i>Chrysogorgia</i> Group 3    | 27 | 17 | 10 | 18 | 20 |
| CE-17-129 | Chrysogorgiidae  | <i>Chrysogorgia</i> Group 3    | 27 | 17 | 10 | 18 | 20 |
| CE-17-142 | Chrysogorgiidae  | <i>Chrysogorgia</i> Group 3    | 27 | 17 | 10 | 18 | 20 |
| CE-17-283 | Chrysogorgiidae  | <i>Chrysogorgia</i> Group 3    | 27 | 17 | 10 | 18 | 20 |
| CE-18-229 | Chrysogorgiidae  | <i>Chrysogorgia</i> Group 3    | 27 | 17 | 10 | 18 | 20 |
| CE-18-289 | Chrysogorgiidae  | <i>Chrysogorgia</i> Group 3    | 27 | 17 | 10 | 18 | 20 |

|            |                 |                                       |    |    |    |    |    |
|------------|-----------------|---------------------------------------|----|----|----|----|----|
| CE-18-292  | Chrysogorgiidae | <i>Chrysogorgia</i><br>Group 3        | 27 | 17 | 10 | 18 | 20 |
| CE-18-631  | Chrysogorgiidae | <i>Chrysogorgia</i><br>Group 3        | 27 | 17 | 10 | 18 | 20 |
| CE-18-154  | Chrysogorgiidae | <i>Dasygorgia</i>                     | 28 | 18 | 10 | 19 | 20 |
| CE-18-418  | Chrysogorgiidae | <i>Dasygorgia</i>                     | 28 | 18 | 10 | 19 | 20 |
| CE-18-419  | Chrysogorgiidae | <i>Dasygorgia</i>                     | 28 | 18 | 10 | 19 | 20 |
| CE-17-388  | Chrysogorgiidae | <i>Chrysogorgia</i><br>Group 1        | 29 | 19 | 11 | 20 | 21 |
| CE-18-237  | Chrysogorgiidae | <i>Chrysogorgia</i><br>Group 1        | 29 | 19 | 11 | 20 | 21 |
| CE-18-248  | Chrysogorgiidae | <i>Chrysogorgia</i><br>Group 1        | 29 | 19 | 11 | 20 | 21 |
| CE-18-295  | Chrysogorgiidae | <i>Chrysogorgia</i><br>Group 1        | 29 | 19 | 11 | 20 | 21 |
| CE-18-632a | Chrysogorgiidae | <i>Chrysogorgia</i><br>Group 1        | 29 | 19 | 11 | 20 | 21 |
| CE-18-434  | Primnoidae      | <i>Narella</i><br><i>bellissima</i>   | 30 | 20 | 12 | 21 | 22 |
| CE-17-290  | Primnoidae      | <i>Candidella</i><br><i>imbricata</i> | 31 | 21 | 13 | 22 | 22 |
| CE-17-305  | Primnoidae      | <i>Candidella</i><br><i>imbricata</i> | 31 | 21 | 13 | 22 | 22 |
| CE-17-340  | Primnoidae      | <i>Candidella</i><br><i>imbricata</i> | 31 | 21 | 13 | 22 | 22 |
| CE-17-346  | Primnoidae      | <i>Candidella</i><br><i>imbricata</i> | 31 | 21 | 13 | 22 | 22 |
| CE-17-352  | Primnoidae      | <i>Candidella</i><br><i>imbricata</i> | 31 | 21 | 13 | 22 | 22 |
| CE-18-321  | Primnoidae      | <i>Narella versluysi</i>              | 32 | 22 | 14 | 23 | 22 |
| CE-17-081  | Primnoidae      | <i>Primnoa</i> sp.                    | 33 | 23 | 15 | 24 | 22 |
| CE-17-095  | Primnoidae      | <i>Primnoa</i> sp.                    | 33 | 23 | 15 | 24 | 22 |
| CE-17-082  | Primnoidae      | <i>Primnoa</i> sp.                    | 35 | 23 | 16 | 24 | 22 |
| CE-17-169  | Primnoidae      | <i>Primnoa</i> sp.                    | 35 | 23 | 16 | 24 | 22 |

|                            |            |                              |    |    |    |    |    |
|----------------------------|------------|------------------------------|----|----|----|----|----|
| CE-17-084                  | Primnoidae | <i>Primnoa</i> sp.           | 36 | 23 | 16 | 25 | 22 |
| CE-17-090                  | Primnoidae | <i>Primnoa</i> sp.           | 36 | 23 | 16 | 25 | 22 |
| CE-17-101                  | Primnoidae | <i>Primnoa</i> sp.           | 36 | 23 | 16 | 25 | 22 |
| CE-17-102                  | Primnoidae | <i>Primnoa</i> sp.           | 36 | 23 | 16 | 25 | 22 |
| CE-17-160                  | Primnoidae | <i>Primnoa</i> sp.           | 34 | 24 | 16 | 24 | 22 |
| CE-18-261                  | Primnoidae | <i>Thouarella grasshoffi</i> | 37 | 25 | 17 | 26 | 23 |
| CE-18-272                  | Primnoidae | <i>Thouarella grasshoffi</i> | 37 | 25 | 17 | 26 | 23 |
| CE-18-278                  | Primnoidae | <i>Thouarella grasshoffi</i> | 37 | 25 | 17 | 26 | 23 |
| CE-18-441                  | Primnoidae | <i>Thouarella grasshoffi</i> | 37 | 25 | 17 | 26 | 23 |
| CE-18-577                  | Primnoidae | <i>Thouarella grasshoffi</i> | 37 | 25 | 17 | 26 | 23 |
| CE-18-568                  | Primnoidae | <i>Calyptrophora clinata</i> | 38 | 26 | 18 | 27 | 24 |
| Total number of haplotypes |            |                              | 38 | 26 | 18 | 27 | 24 |

## 1. Family Keratoisididae

Thirty morphotypes belonging to 23 haplotypes were found.

### **Morphotype 1 – Haplotype 9**

#### **Subclade D2**

*Vouchers:* **CE-18-288**

*Location:* North Porcupine Bank at 1296 m.

*Colony and polyp morphology:* Sparse dichotomous branching originating at the internodes, occurring in a single plane (Figure S1a, and b). Found attached to hard substrate. The coenenchyme is thick and a cream in colour with polyps, orange to pink, originating from all sides of the coenenchyme. Polyps are cylindrical (Figure S1c, and d).

*Sclerites:* Needles arranged longitudinally along the polyp body ( $\approx 6.6$  mm – 2 mm, Figure S1e) and the coenenchyme (were not imaged). Intertentacular sclerites present. These needles are finely striated along the middle of the sclerite and have grooves and ridges at both ends. Blunt ended rods ( $\approx 800$   $\mu$ m – 430  $\mu$ m) and flattened rods ( $\approx 300$   $\mu$ m – 230  $\mu$ m) are found in the tentacles (Figure S1g). The rods from the tentacles have a heavy dentition of grooves and ridges on each end. Thorned rodlets ( $\approx 90$   $\mu$ m) are found in the pharynx (Figure S1h).

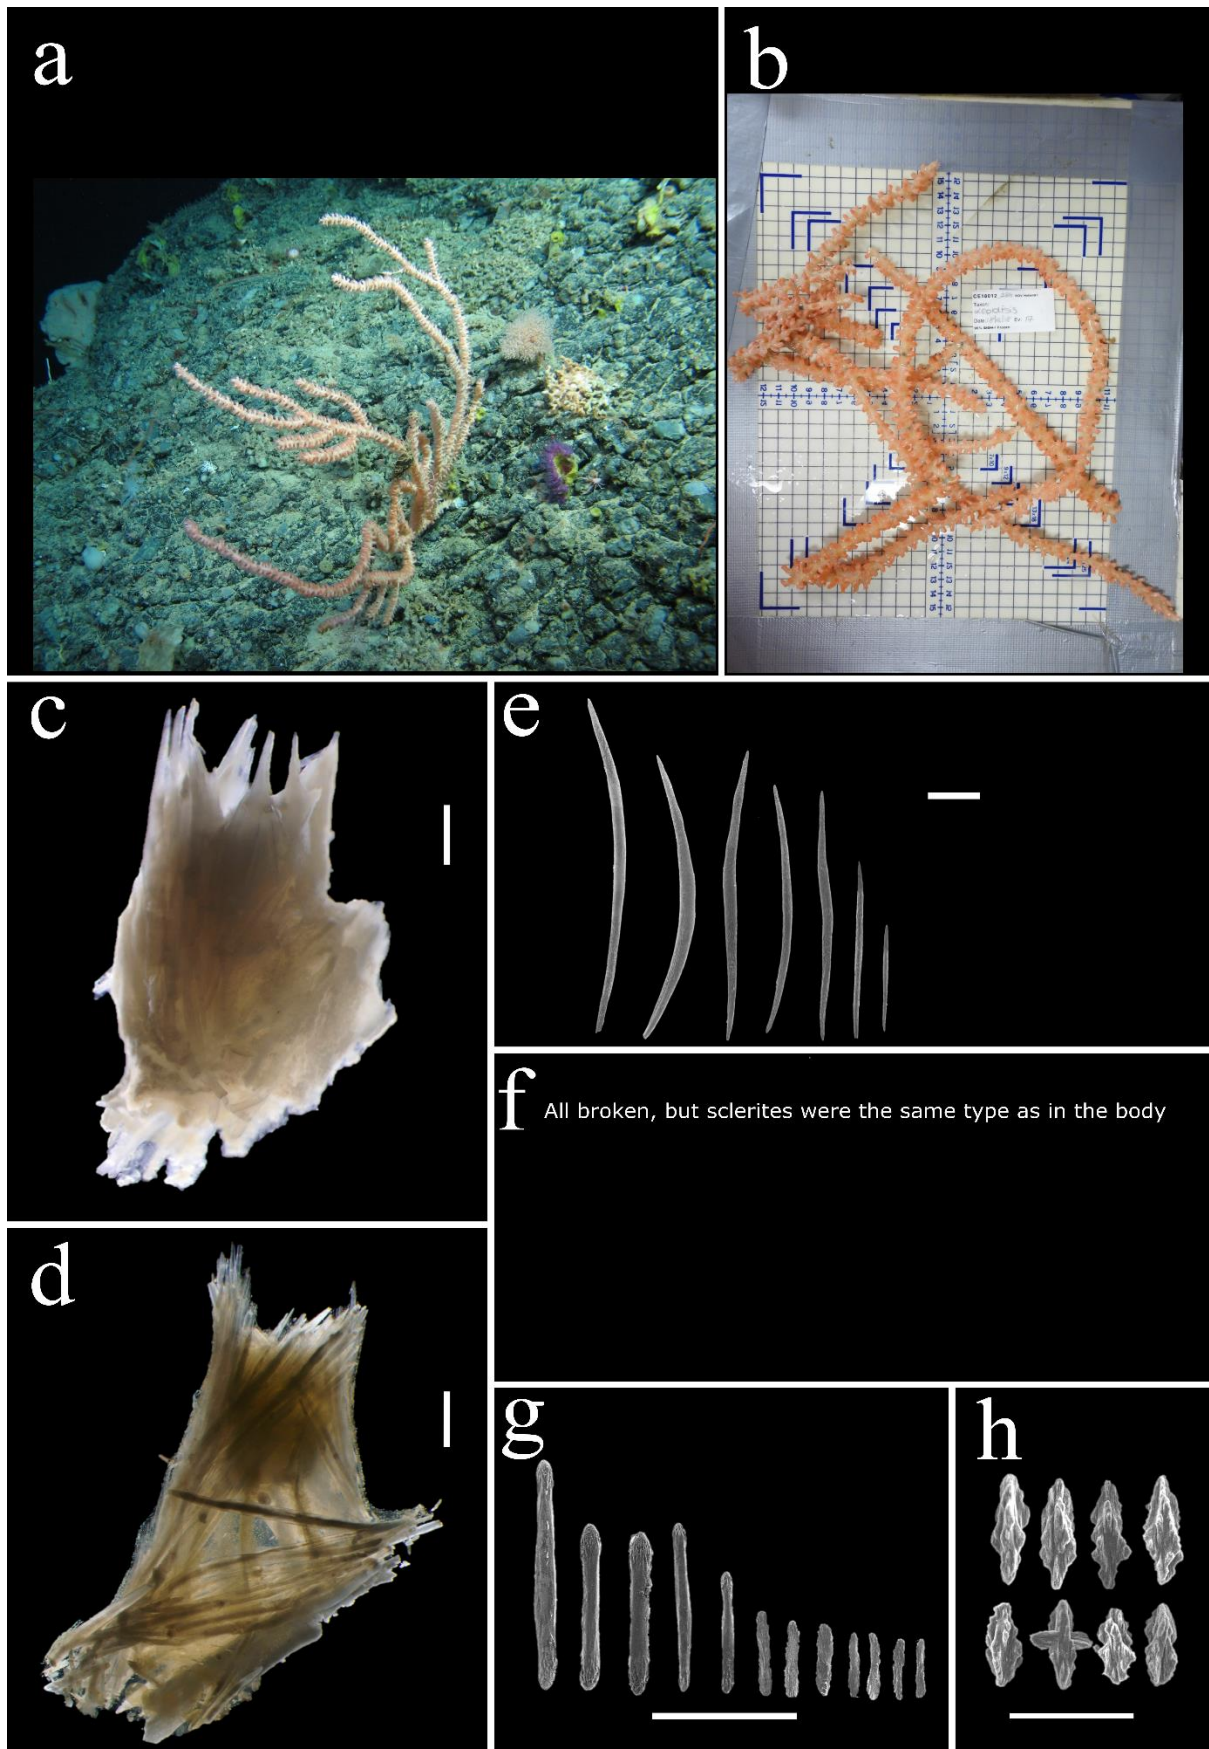

Figure S1. Morphotype 1 – Haplotype 9, voucher CE-18-288. **a**, *In-situ* image. **b**, *Ex-situ* image. **c**, Whole polyp. **d**, Whole polyp cleared in clove oil. **e**, Sclerites from the body wall. **f**, Sclerites from the coenenchyme. **g**, Sclerites from the tentacles. **h**, Sclerites from the pharynx. Scale bar: c, d, and e = 1 mm, g = 500  $\mu$ m, and h = 100  $\mu$ m.



## **Morphotype 2 – Haplotype 11**

### **Subclade D2**

*Vouchers:* **CE-18-039**

*Location:* North Porcupine Bank at 2118 m.

*Colony and polyp morphology:* Only a fragment was collected (Figure S2b). So only polyp morphology is available. Polyps are orange and are the same width from distal to proximal ends (Figure S2c and d). The polyps originate from opposite sides of the coenenchyme. Tentacles fold over the polyp mouth.

*Sclerites:* Rods ( $\approx 1.4$  mm – 850  $\mu$ m, Figure S2e) are arranged obliquely at the base of the polyp body and longitudinally towards the distal end, sometime projecting past the base of the tentacles. Rods are also present in the coenenchyme ( $\approx 1.2$  mm – 310  $\mu$ m, Figure S2f). The body sclerites are rods which are finely striated and have grooves and ridges on the ends. Blunt ended rods ( $\approx 400$   $\mu$ m) with ridges and grooves at the tips and flattened rods ( $\approx 200$   $\mu$ m – 100  $\mu$ m) are present in the tentacles (Figure S2g). Pharynx sclerites were not extracted due to a lack of available material.

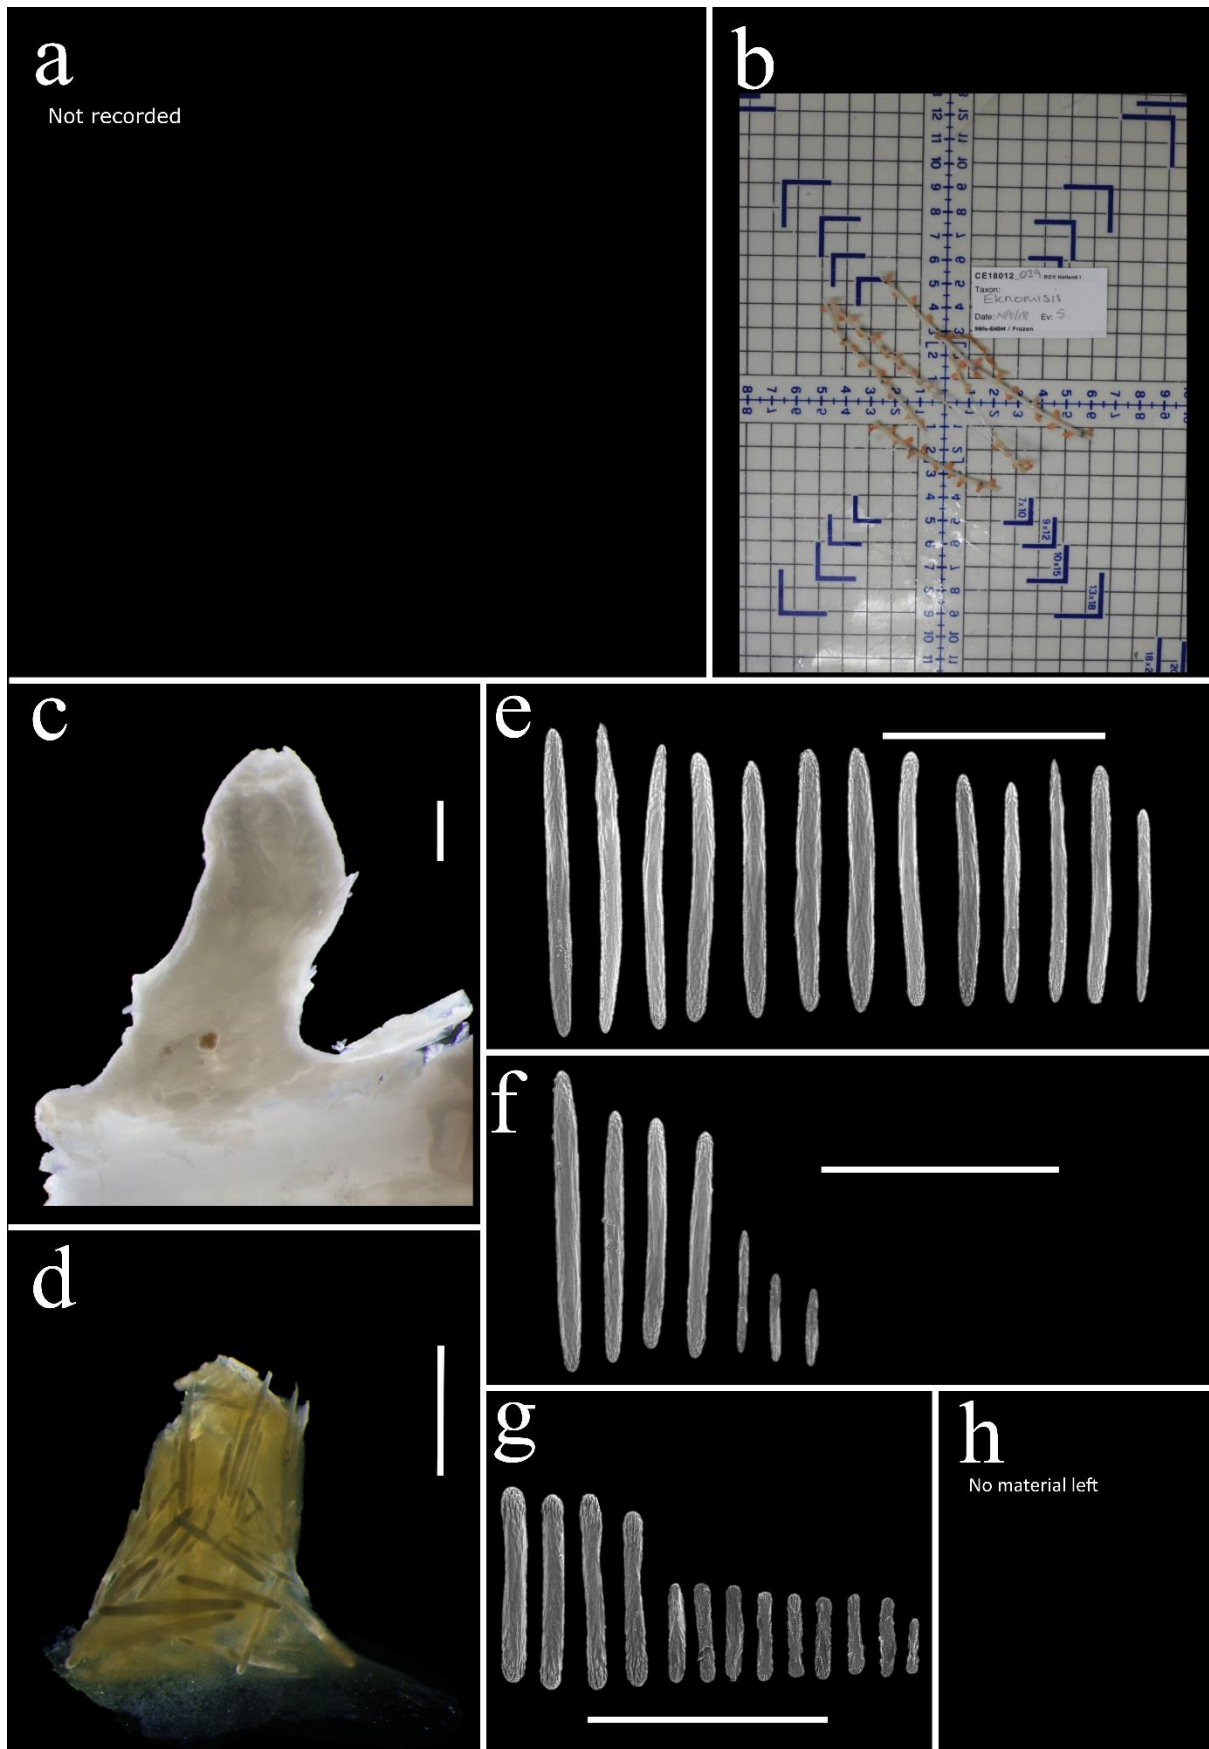

Figure S2. Morphotype 2 – Haplotype 11, voucher CE-18-039. **a**, *In-situ* image. **b**, *Ex-situ* image. **c**, Whole polyp. **d**, Whole polyp cleared in clove oil. **e**, Sclerites from the body wall. **f**, Sclerites from the coenenchyme. **g**, Sclerites from the tentacles. **h**, Sclerites from the pharynx. Scale bar: c, d, e, and f = 1 mm, g = 500  $\mu$ m.

### **Morphotype 3 – Haplotype 10**

*Vouchers:* **CE-18-222**

*Location:* North Porcupine Bank at 1301 m.

*Colony and polyp morphology:* Branches dichotomously from the internodes (Figure S3a and b). Found attached to hard substrate. Branching occurs often and in multiple planes. The coenenchyme is cream in colour, and densely populated with orange to pink polyps originating from all sides. The polyps are cylindrical (Figure S3c and d).

*Sclerites:* Needles and rods are arranged longitudinally along the polyp body ( $\approx 4.5$  mm – 390  $\mu$ m, Figure S3e) and present in coenenchyme ( $\approx 1.2$  mm – 440  $\mu$ m, Figure S3f). The body and coenenchyme sclerites are finely striated along the entire length of the sclerite including the tips. Blunt ended rods ( $\approx 750$   $\mu$ m – 300  $\mu$ m) and flattened rods ( $\approx 210$   $\mu$ m – 90  $\mu$ m) are present in the tentacles (Figure S3g) and thorned rodlets ( $\approx 110$   $\mu$ m – 70  $\mu$ m) are found in the pharynx (Figure S3h). The blunt ended rods have grooves and ridges on both ends of each sclerite.

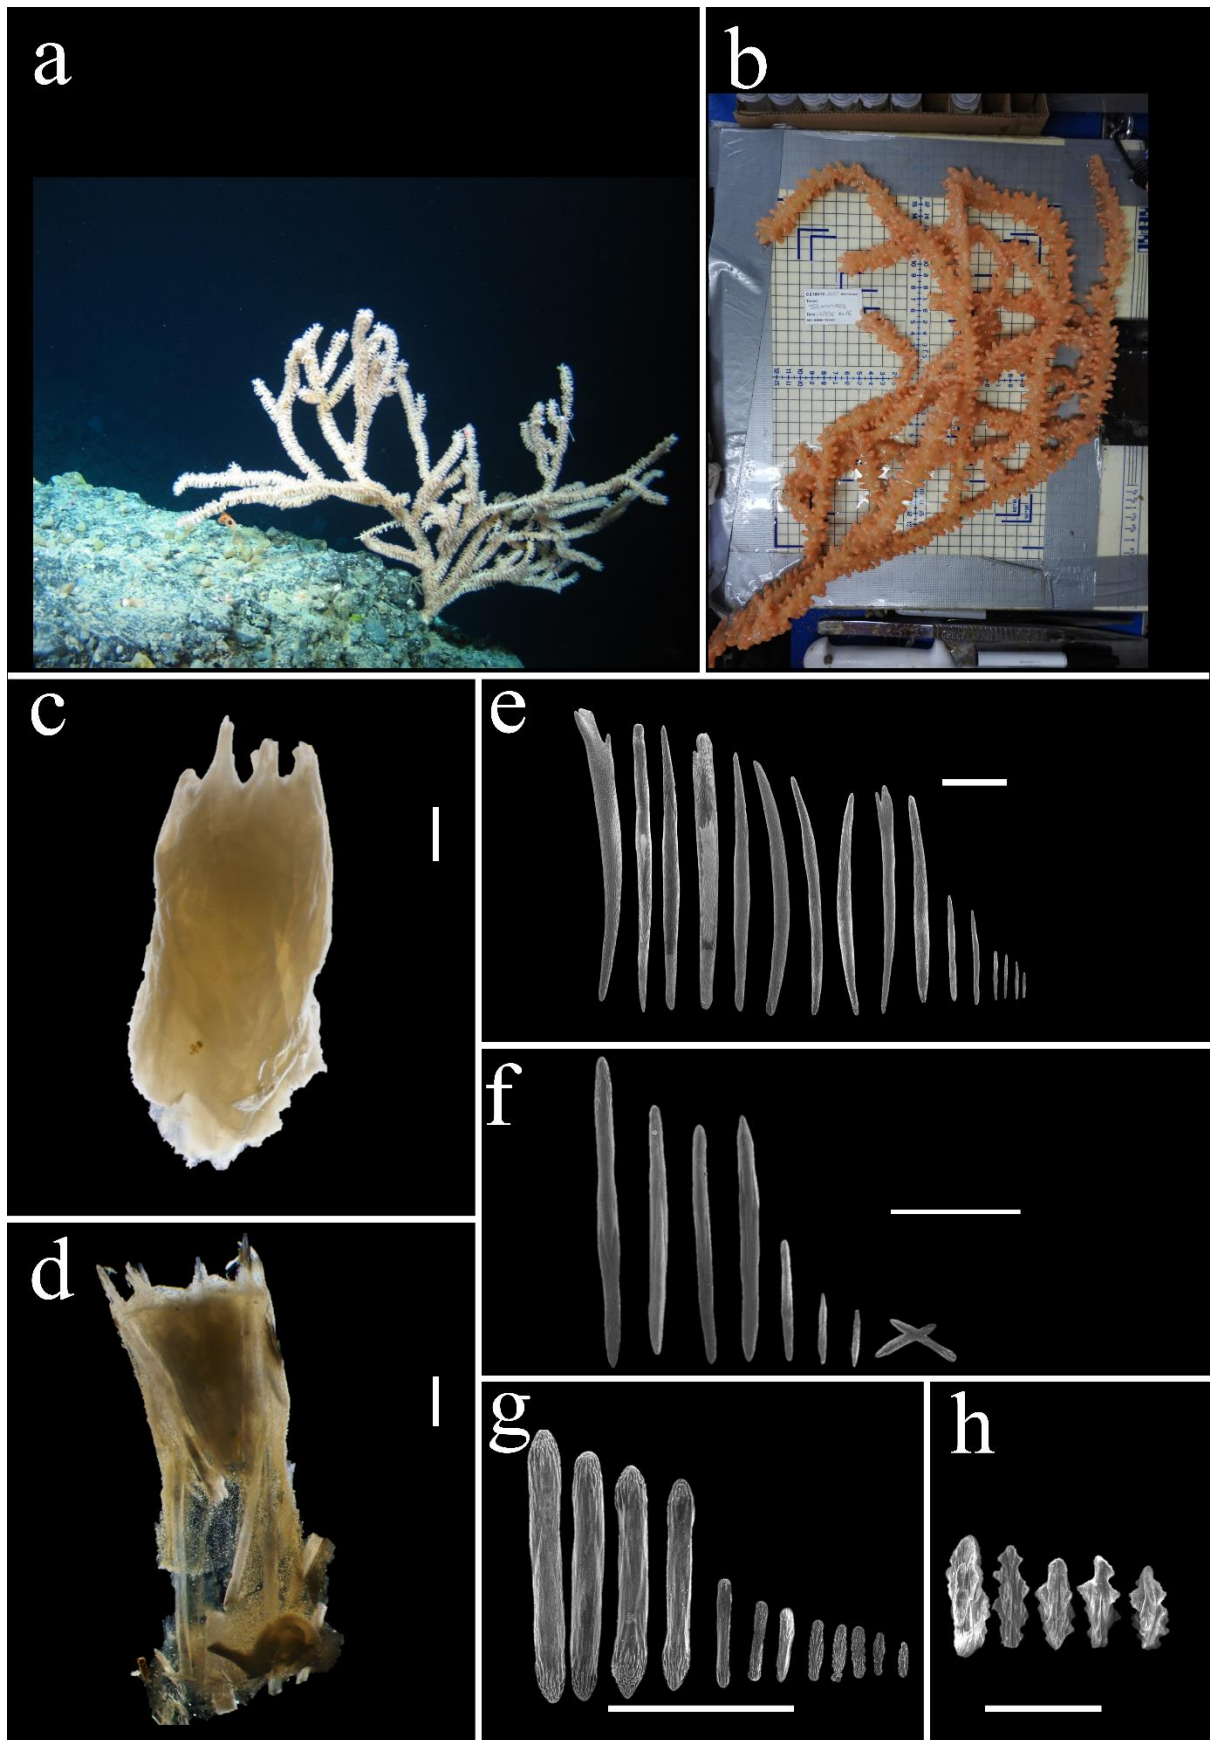

Figure S3. Morphotype 3 – Haplotype 10, voucher CE-18-222. **a**, *In-situ* image. **b**, *Ex-situ* image. **c**, Whole polyp. **d**, Whole polyp cleared in clove oil. **e**, Sclerites from the body wall. **f**, Sclerites from the coenenchyme. **g**, Sclerites from the tentacles. **h**, Sclerites from the pharynx. Scale bar: c, d, and e = 1 mm, f and g = 500  $\mu$ m, and h = 100  $\mu$ m.

## **Morphotype 4 – Haplotype 7**

*Vouchers:* **CE-17-201**

*Location:* Whittard Canyon at 1997 m.

*Colony and polyp morphology:* Sparse dichotomous branching from the internodes (Figure S4a and b). Coenenchyme is cream in colour. Polyps are distally pink in colour and are slightly tapered at the distal end (Figure S4c and d). Polyps primarily originate from two opposing planes along the coenenchyme.

*Sclerites:* Rods are arranged obliquely along the polyp body ( $\approx 3.4$  mm – 1.2 mm, Figure S4e) and coenenchyme ( $\approx 1.7$  mm – 540  $\mu$ m, Figure S4f). These rods are finely striated along the length of the sclerite with grooves and ridges at the ends. Intertentacular sclerites present, sometimes as a cluster of sclerites. Blunt ended rods ( $\approx 500$   $\mu$ m - 260  $\mu$ m) with grooves and ridges at the ends and flattened rods ( $\approx 200$   $\mu$ m – 130  $\mu$ m) are found in the tentacles (Figure S4g). Thorned rodlets ( $\approx 75$   $\mu$ m – 40  $\mu$ m) are found in the pharynx (Figure S4h).

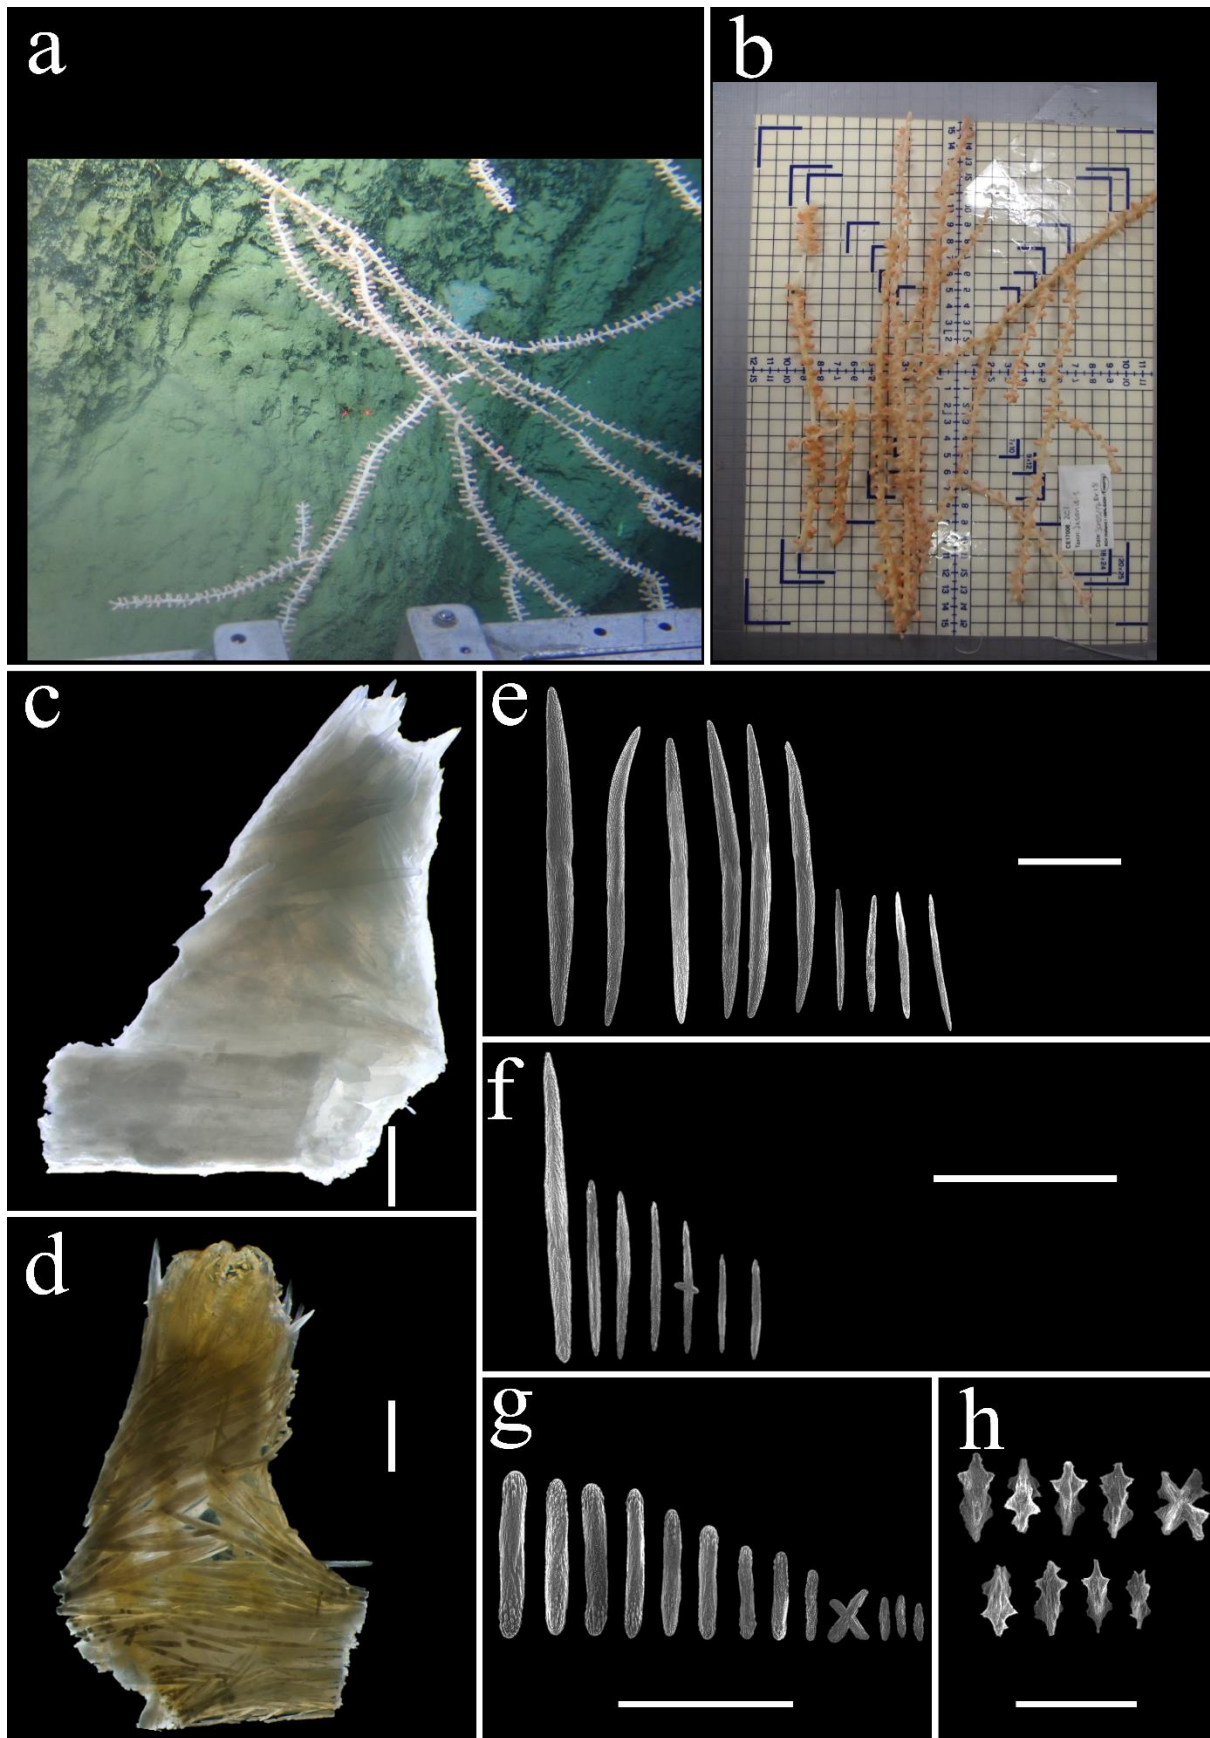

Figure S4. Morphotype 4 – Haplotype 7, voucher CE-17-201. **a**, *In-situ* image. **b**, *Ex-situ* image. **c**, Whole polyp. **d**, Whole polyp cleared in clove oil. **e**, Sclerites from the body wall. **f**, Sclerites from the coenenchyme. **g**, Sclerites from the tentacles. **h**, Sclerites from the pharynx. Scale bar: c, d, e, and f = 1 mm, g = 500  $\mu$ m, and h = 100  $\mu$ m.



## **Morphotype 5 – Haplotype 8**

### **Subclade D2**

*Vouchers:* **CE-18-129**

*Location:* North Porcupine Bank between 1791 m.

*Colony and polyp morphology:* Sparse dichotomous branching from the internodes (Figure S5a and b). The coenenchyme is cream with polyps, orange to pink in colour, originating from all sides. Polyps are tapered at the distal end (Figure S5c and d).

*Sclerites:* Needles and rods are arranged obliquely along the polyp body ( $\approx 2.6$  mm – 250  $\mu$ m, Figure S5e) and coenenchyme ( $\approx 1.9$  mm – 300  $\mu$ m, Figure S5f). The body and coenenchyme sclerites are finely striated in the middle of the sclerite with both ridges and grooves found at one or both ends of the sclerites. Intertentacular sclerites present, sometimes as clusters of sclerites. Blunt ended rods ( $\approx 510$   $\mu$ m – 400  $\mu$ m) are present in the tentacles (Figure S5g) with the same striation, grooves, and ridges present in the body and coenenchyme sclerites. Flattened rods ( $\approx 210$   $\mu$ m – 70  $\mu$ m) are also present in the tentacles (Figure S5g). Thorned rodlets ( $\approx 100$   $\mu$ m) are found in the pharynx (Figure S5h).

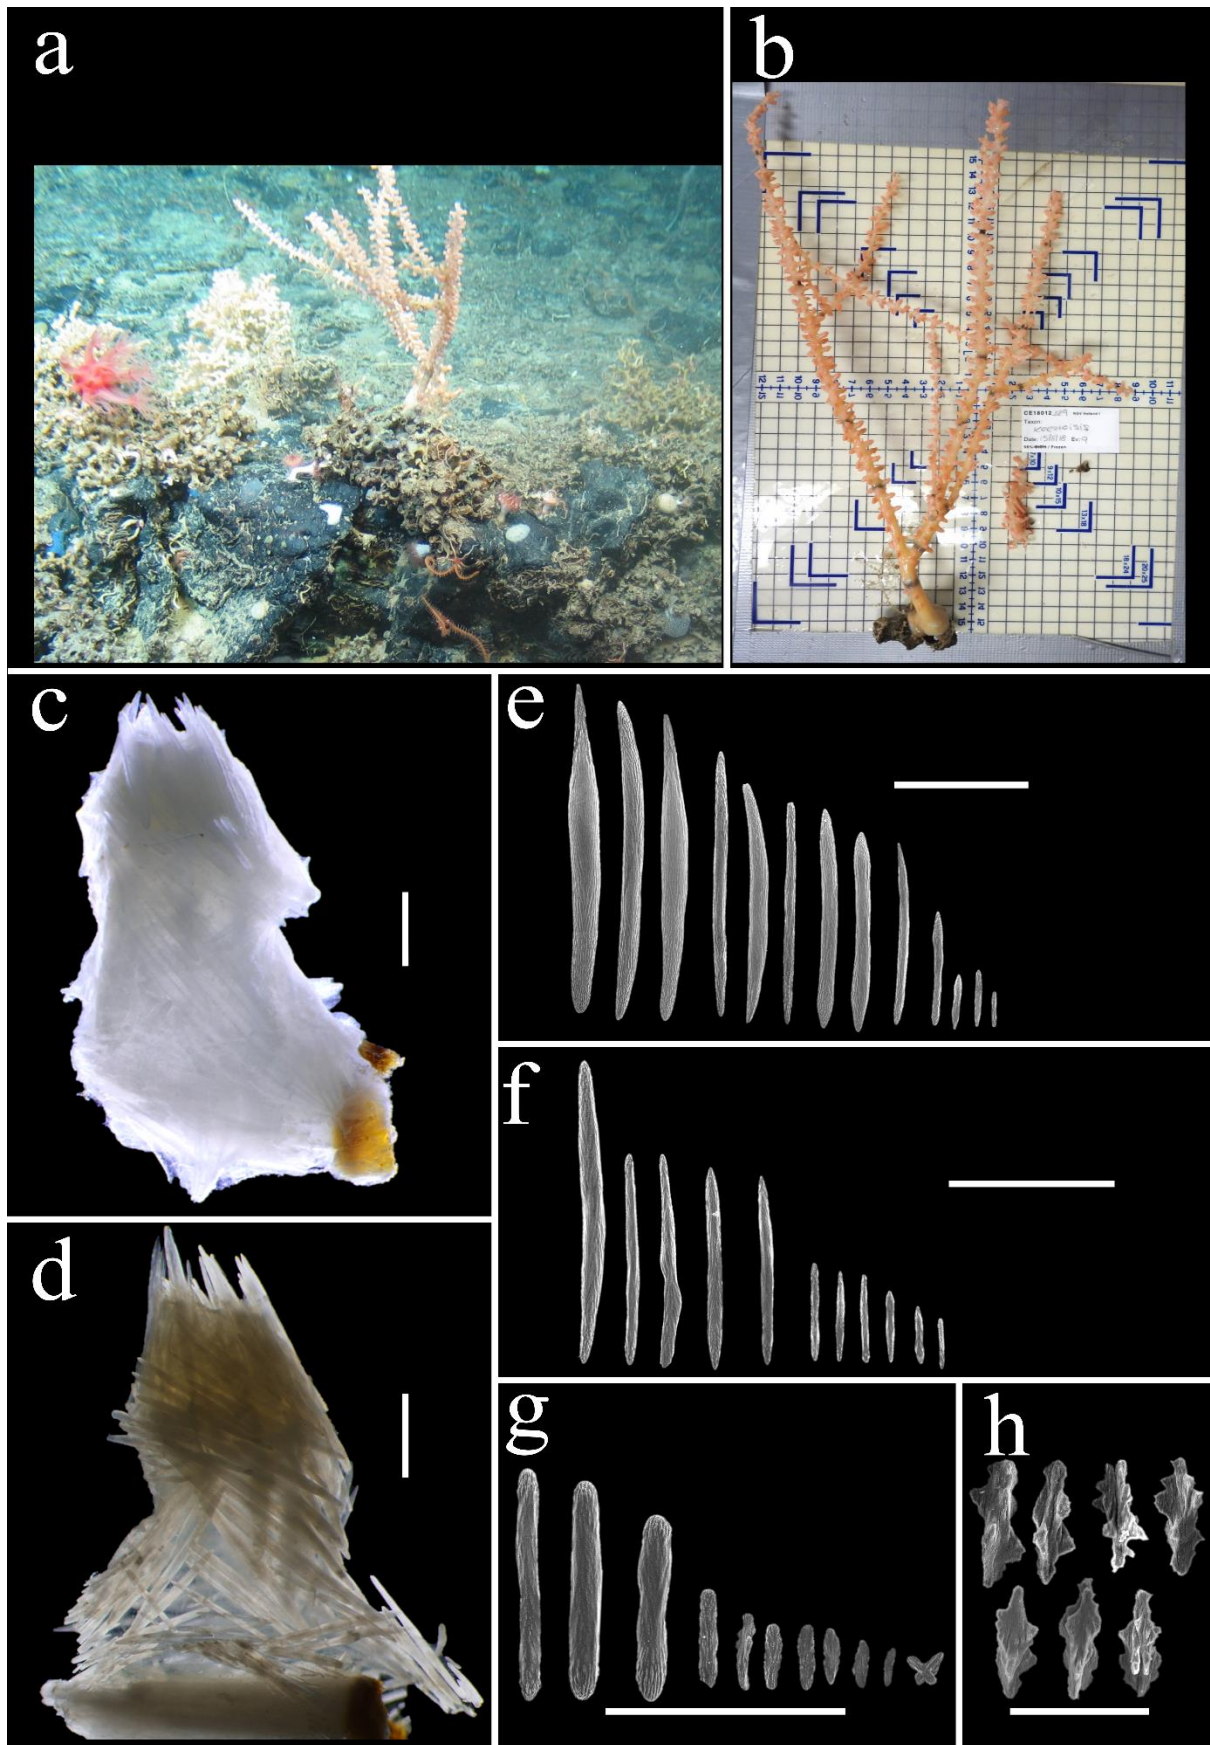

Figure S5. Morphotype 5 – Haplotype 8, voucher CE-18-249. **a**, *In-situ* image. **b**, *Ex-situ* image. **c**, Whole polyp. **d**, Whole polyp cleared in clove oil. **e**, Sclerites from the body wall. **f**, Sclerites from the coenenchyme. **g**, Sclerites from the tentacles. **h**, Sclerites from the pharynx. Scale bar: c, d, e, and f = 1 mm, g = 500  $\mu$ m, and h = 100  $\mu$ m.



## **Morphotype 6 – Haplotype 8**

### **Subclade D2**

*Vouchers:* CE-18-132, **CE-18-387**

*Location:* North Porcupine Bank between 1679 – 1766 m.

*Colony and polyp morphology:* Dichotomous branching from the internodes (Figure S6a and b). Polyps are barrel shaped (Figure S6c and d), orange to pink in colour, and occur on all sides of the orange coenenchyme. Tentacles folded neatly over the top of the polyp.

*Sclerites:* Needles and rods are arranged obliquely along the polyp body ( $\approx 2\text{ mm} - 260\text{ }\mu\text{m}$ , Figure S6e), and are also present in the coenenchyme ( $\approx 2.1\text{ mm} - 210\text{ }\mu\text{m}$ , Figure S6f). Rarely, body sclerites project past the base of the tentacles. Blunt ended rods ( $\approx 500\text{ }\mu\text{m} - 330\text{ }\mu\text{m}$ ) with grooves and ridges at the tips and fattened rods are found in the tentacles ( $\approx 165\text{ }\mu\text{m} - 90\text{ }\mu\text{m}$ , Figure S6g). The body and coenenchyme sclerites are finely striated and have grooves and ridges at the ends of the sclerites. The blunt ended rods are also ornamented with grooves and ridges at the sclerite tips. Thorned rodlets ( $\approx 100\text{ }\mu\text{m}$ ) are present in the pharynx (Figure S6h).

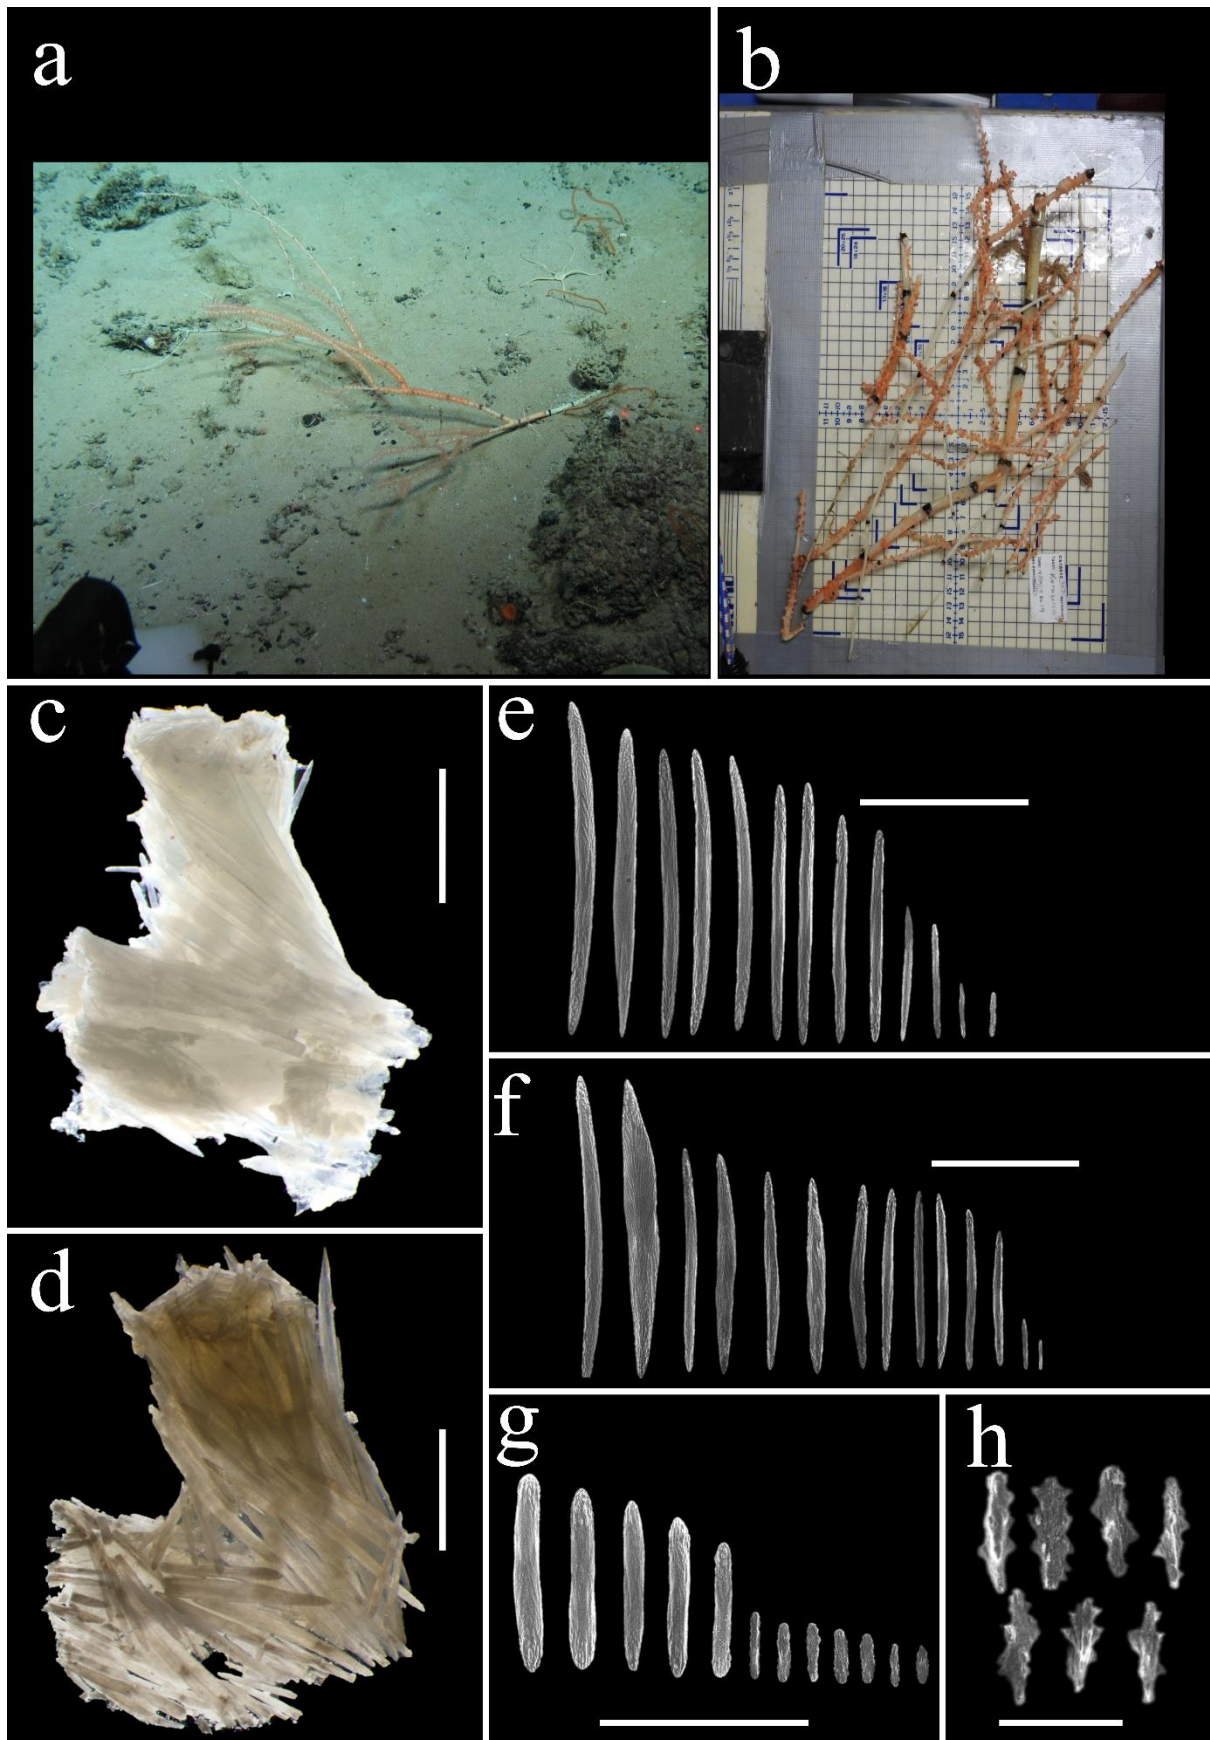

Figure S6. Morphotype 6 – Haplotype 8, voucher CE-18-387. **a**, *In-situ* image. **b**, *Ex-situ* image. **c**, Whole polyp. **d**, Whole polyp cleared in clove oil. **e**, Sclerites from the body wall. **f**, Sclerites from the coenenchyme. **g**, Sclerites from the tentacles. **h**, Sclerites from the pharynx. Scale bar: c, d, e, and f = 1 mm, g = 500  $\mu$ m, and h = 100  $\mu$ m.

## **Morphotype 7 – Haplotype 1**

### **Subclade D1**

**Vouchers:** CE-17-266, CE-17-597, CE-18-404, CE-18-509

*Location:* Whittard Canyon and North Porcupine Bank between 1509 – 1787 m.

*Colony and polyp morphology:* Dichotomous branching from the internodes. Fan shaped colony (Figure S7a and b) attached to scleractinian rubble by a white circular disk. Coenenchyme is cream to orange in colour and densely populated with polyps that originate on all sides. Polyps are orange to pink in colour and cylindrical in shape (Figure S7c and d).

*Sclerites:* Needles and rods are arranged obliquely and longitudinally along the polyp body ( $\approx 4.87$  mm – 1.2 mm Figure S7e). Body sclerites are finely striated longitudinally with heavy dentition of grooves and ridges at each end. Intertentacular sclerites present. There are no coenenchyme sclerites present. Blunt ended rods ( $\approx 670$   $\mu$ m – 360  $\mu$ m) and flattened rodlets ( $\approx 200$   $\mu$ m – 100  $\mu$ m) are found in the tentacles (Figure S7g). The blunt ended rods have grooves and ridges at the ends. Thorned rodlets ( $\approx 100$   $\mu$ m) are present in the pharynx (Figure S7h).

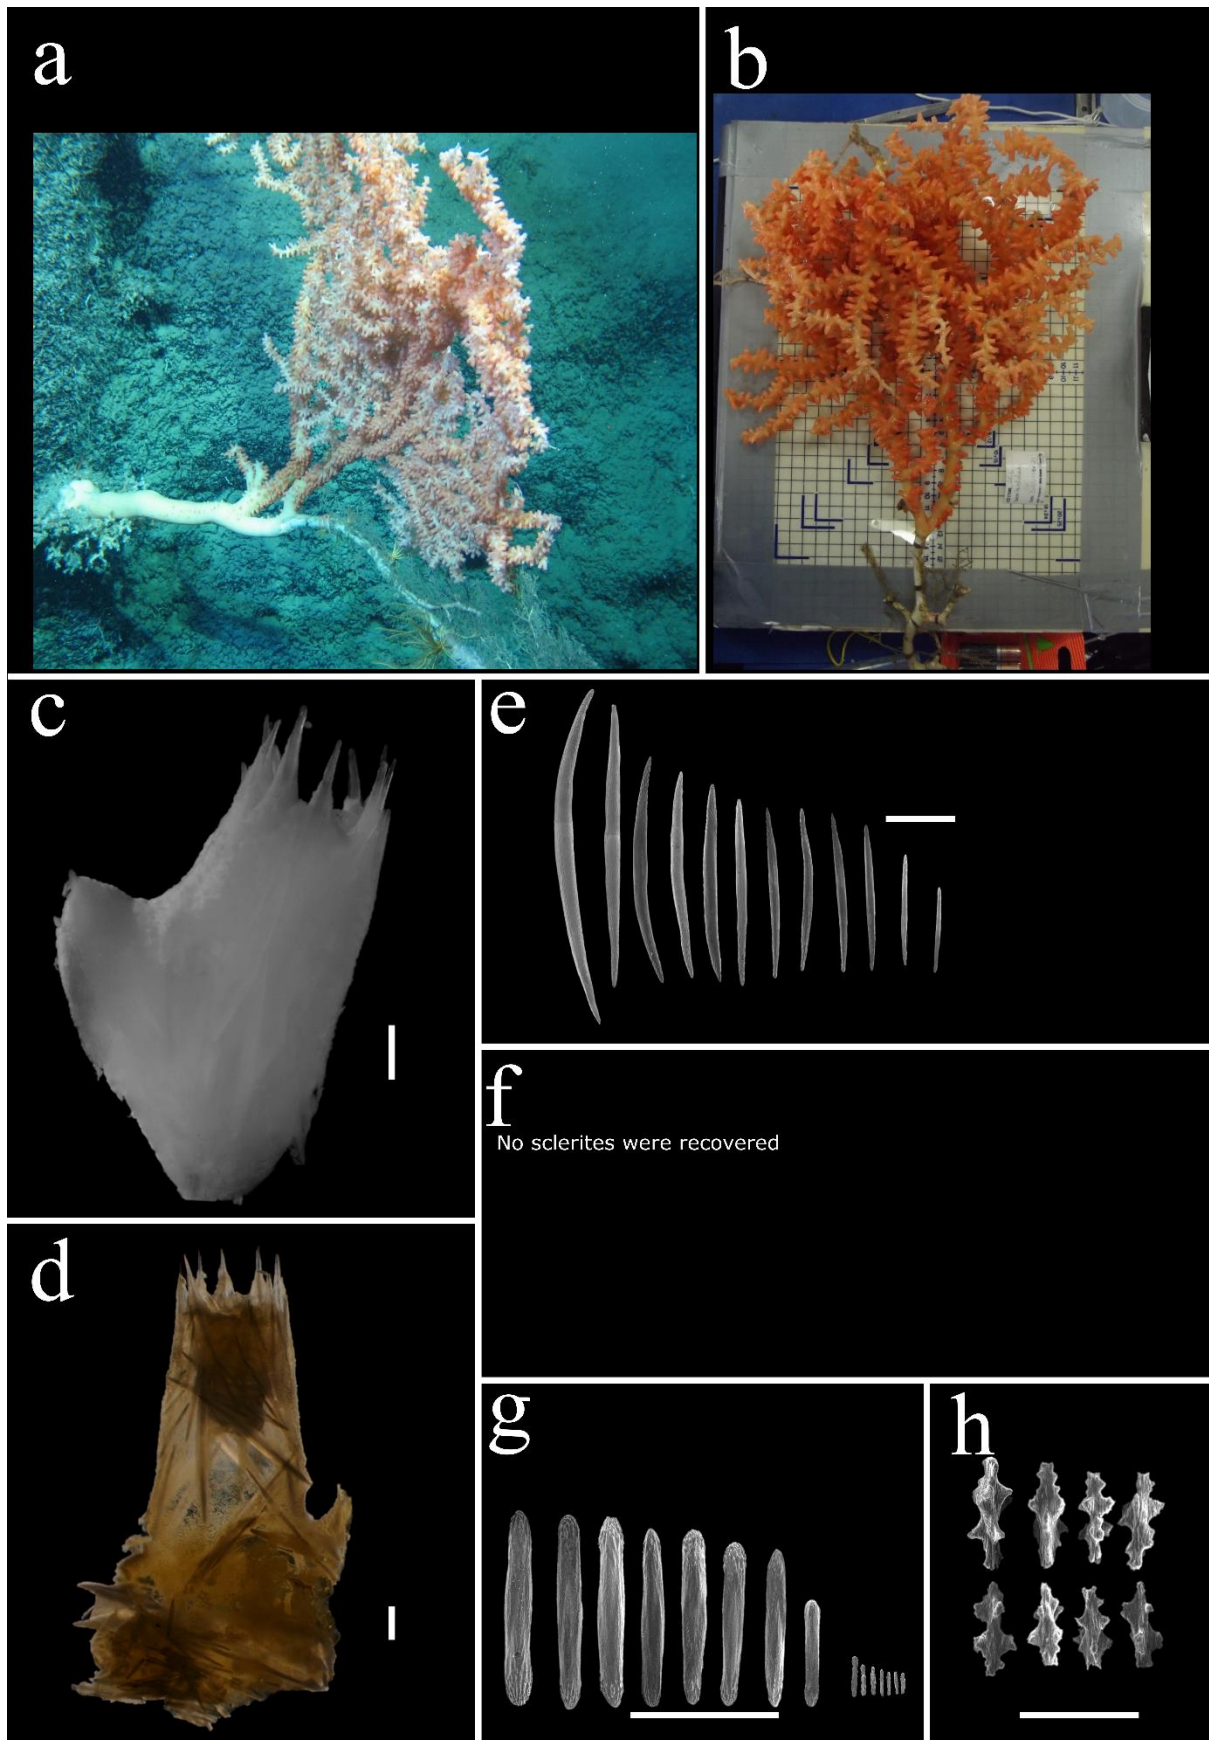

Figure S7. Morphotype 7 – Haplotype 1, voucher CE-17-266. **a**, *In-situ* image. **b**, *Ex-situ* image. **c**, Whole polyp. **d**, Whole polyp cleared in clove oil. **e**, Sclerites from the body wall. **f**, Sclerites from the coenenchyme. **g**, Sclerites from the tentacles. **h**, Sclerites from the pharynx. Scale bar: c, d, and e = 1 mm, g = 500  $\mu$ m, and h = 100  $\mu$ m.

## **Morphotype 8 – Haplotype 1:**

### **Subclade D1**

*Vouchers:* CE-18-435, **CE-18-646**

*Location:* North Porcupine Bank between 1395 – 1418 m.

*Colony and polyp morphology:* Sparse dichotomous branching from the internodes (Figure S8a and b). Attached to scleractinian rubble, seemingly directly to holdfast. The coenenchyme is pink-orange and distally thickened. Polyps are pink-orange in colour, darker than the coenenchyme. The polyps are the same width at both proximal and distal ends of the polyps (Figure S8c and d).

*Sclerites:* Needles and rods are arranged obliquely along the body ( $\approx 3.4$  mm – 300  $\mu$ m, Figure S8e). Body sclerites are finely striated along the middle of the sclerite and have grooves and ridges at both ends. Some larger sclerites, sometimes clusters of fused sclerites, project past the base of the tentacles, not always between tentacles. There are no coenenchyme sclerites. Blunt ended rods ( $\approx 580$   $\mu$ m – 340  $\mu$ m) and flattened rodlets ( $\approx 180$   $\mu$ m – 80  $\mu$ m) are present in the tentacles (Figure S8g) and thorned rodlets ( $\approx 130$   $\mu$ m – 60  $\mu$ m) are found in the pharynx (Figure S8h). The blunt ended rods have grooves and ridges at both ends of the sclerite.



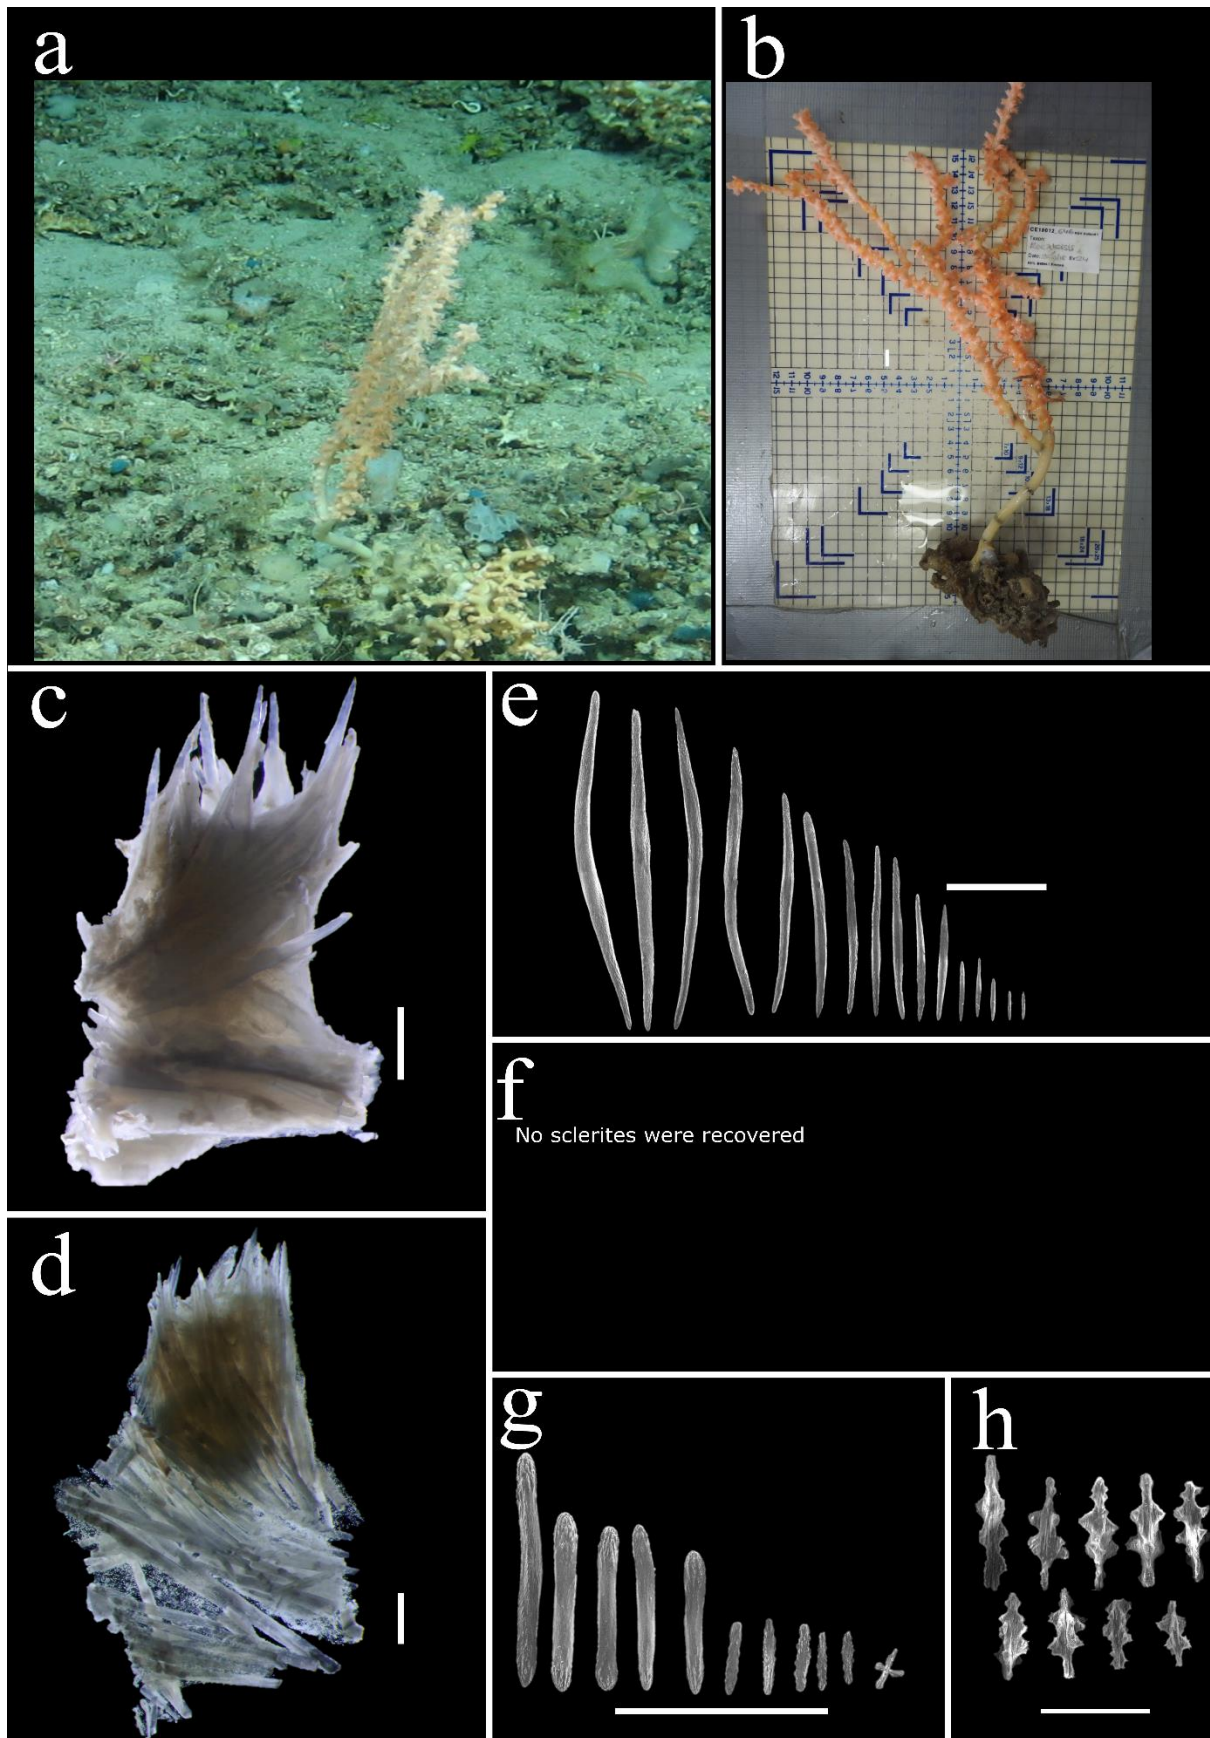

Figure S8. Morphotype 8 – Haplotype 1, voucher CE-18-646. **a**, *In-situ* image. **b**, *Ex-situ* image. **c**, Whole polyp. **d**, Whole polyp cleared in clove oil. **e**, Sclerites from the body wall. **f**, Sclerites from the coenenchyme. **g**, Sclerites from the tentacles. **h**, Sclerites from the pharynx. Scale bar: c, d, and e = 1 mm, g = 500  $\mu$ m, and h = 100  $\mu$ m.

## **Morphotype 9 – Haplotype 2**

### **Subclade D1**

*Vouchers:* **CE-18-508**

*Location:* North Porcupine Bank at 1509 m.

*Colony and polyp morphology:* Sparse dichotomous branching from the internodes, found attached to a rock by a circular disk (Figure S9a and b) The coenenchyme appears thin, and transparent. Polyps are barrel shaped (Figure S9c and d), orange to pink, and originate on all sides of the coenenchyme.

*Sclerites:* Needles and rods are arranged obliquely around the polyp body ( $\approx 4.3$  mm – 470  $\mu$ m, Figure S9e). These body sclerites are finely striated and have grooves and ridges at the ends. Intertentacular sclerites present, sometimes as clusters of fused sclerites. No sclerites are observed in the coenenchyme. Blunt ended rods ( $\approx 630$   $\mu$ m – 350  $\mu$ m) and flattened rods ( $\approx 160$   $\mu$ m) are found in the tentacles (Figure S9g). Thorned rodlets ( $\approx 100$   $\mu$ m) are present in the pharynx (Figure S9h).

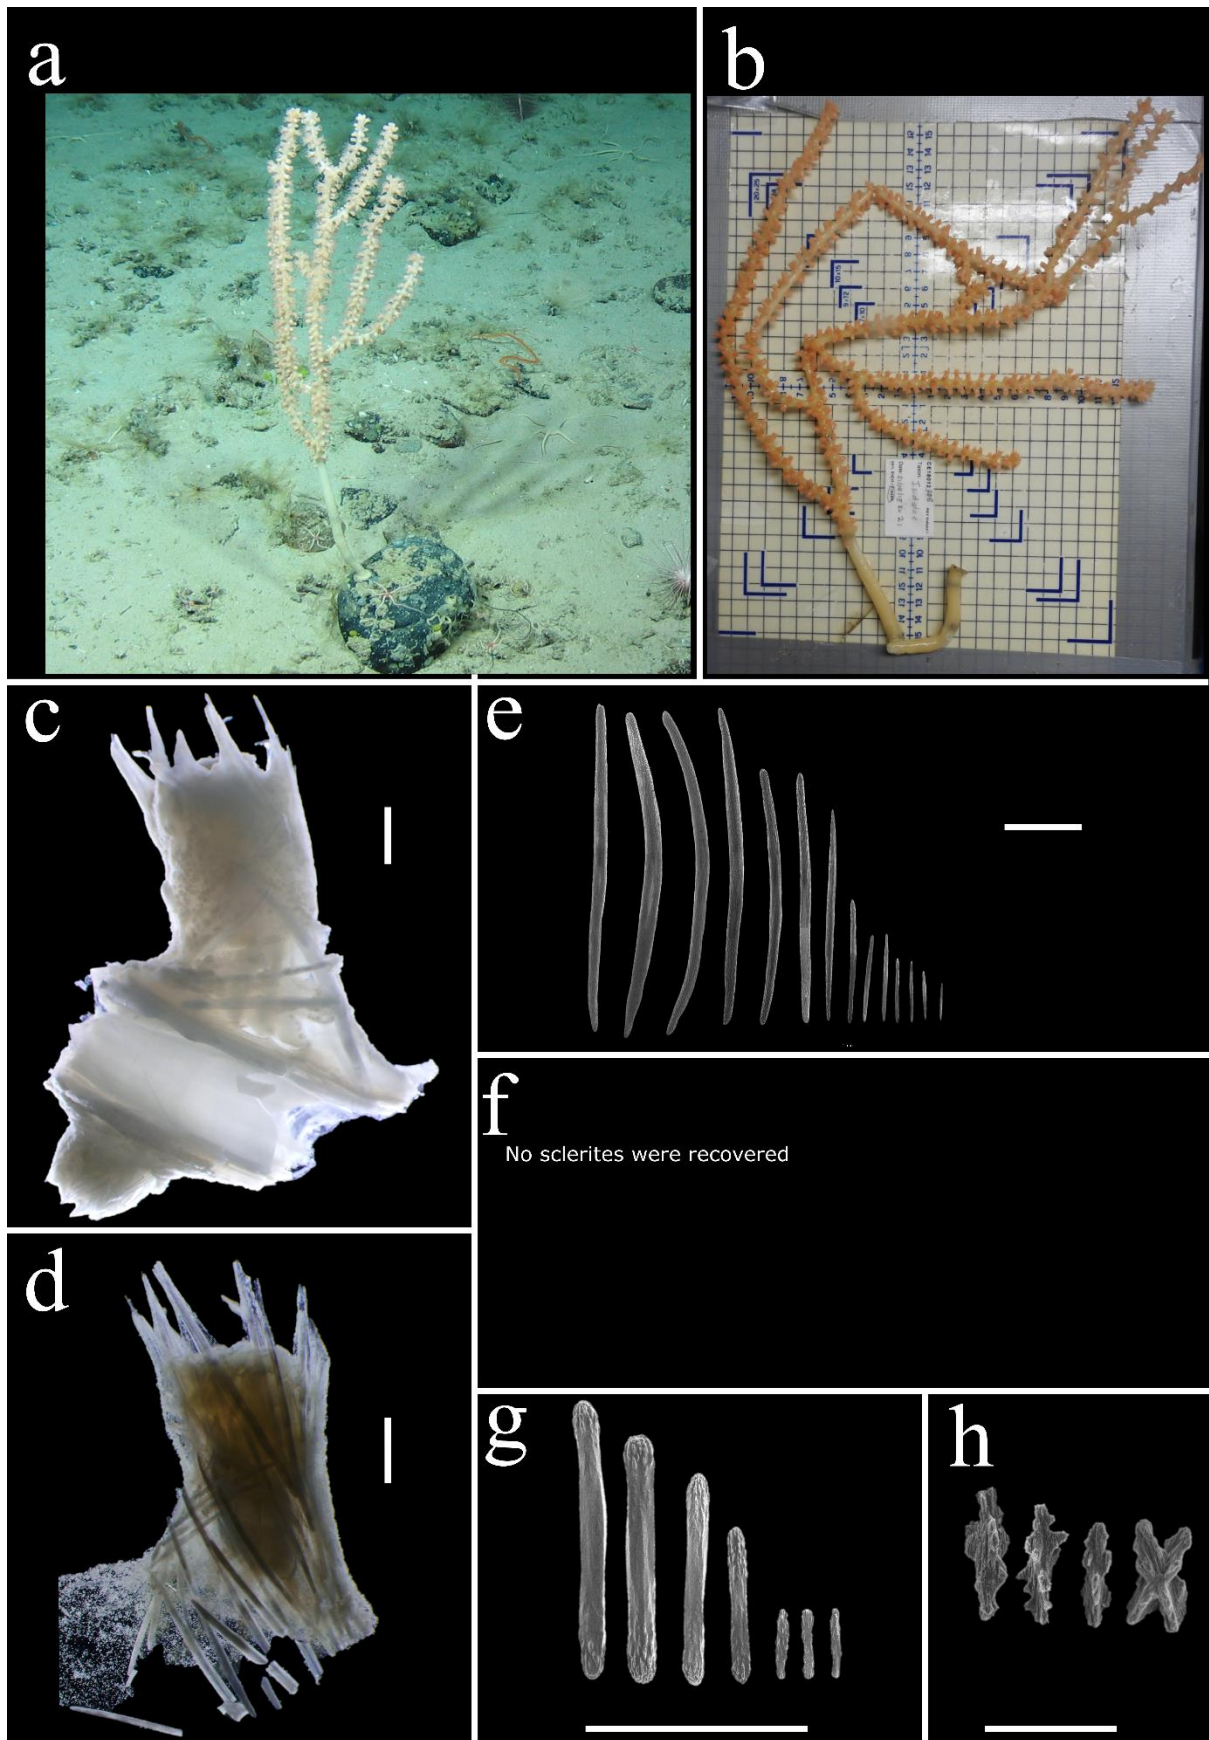

Figure S9. Morphotype 9 – Haplotype 2, voucher CE-18-508. **a**, *In-situ* image. **b**, *Ex-situ* image. **c**, Whole polyp. **d**, Whole polyp cleared in clove oil. **e**, Sclerites from the body wall. **f**, Sclerites from the coenenchyme. **g**, Sclerites from the tentacles. **h**, Sclerites from the pharynx. Scale bar: c, d, and e = 1 mm, g = 500  $\mu$ m, and h = 100  $\mu$ m.



## **Morphotype 10 – Haplotype 4**

### **Subclade B1**

*Vouchers:* **CE-17-174**

*Location:* Whittard Canyon at 1489 m.

*Colony and polyp morphology:* Unbranched whip coral (Figure S10a and b) attached to hard substrate. Coenenchyme is orange and densely populated on all sides with polyps. Polyps are a darker orange than the coenenchyme and are trumpet shaped, wider distally (Figure S10c and d). Tentacles fold neatly over the mouth.

*Sclerites:* Needles ( $\approx 5.3$  mm – 2.5 mm) and scales ( $\approx 260$   $\mu$ m, Figure S10e) are arranged longitudinally and obliquely in the body the body with many fusiform sclerites present. Intertentacular sclerites present either as individual or clusters of needles. Flattened rods are present in the tentacles. Coenenchyme sclerites (Figure S10f) are the same as body sclerites: rods and needles ( $\approx 1$ mm – 380  $\mu$ m) and scales ( $\approx 300$   $\mu$ m). Small flattened rods ( $\approx 300$   $\mu$ m – 80  $\mu$ m, Figure S10g) are found in the tentacles. Body and coenenchyme sclerites are smooth and rarely have warts. Thorned rodlets ( $\approx 85$   $\mu$ m, Figure S10h) are found in the pharynx.

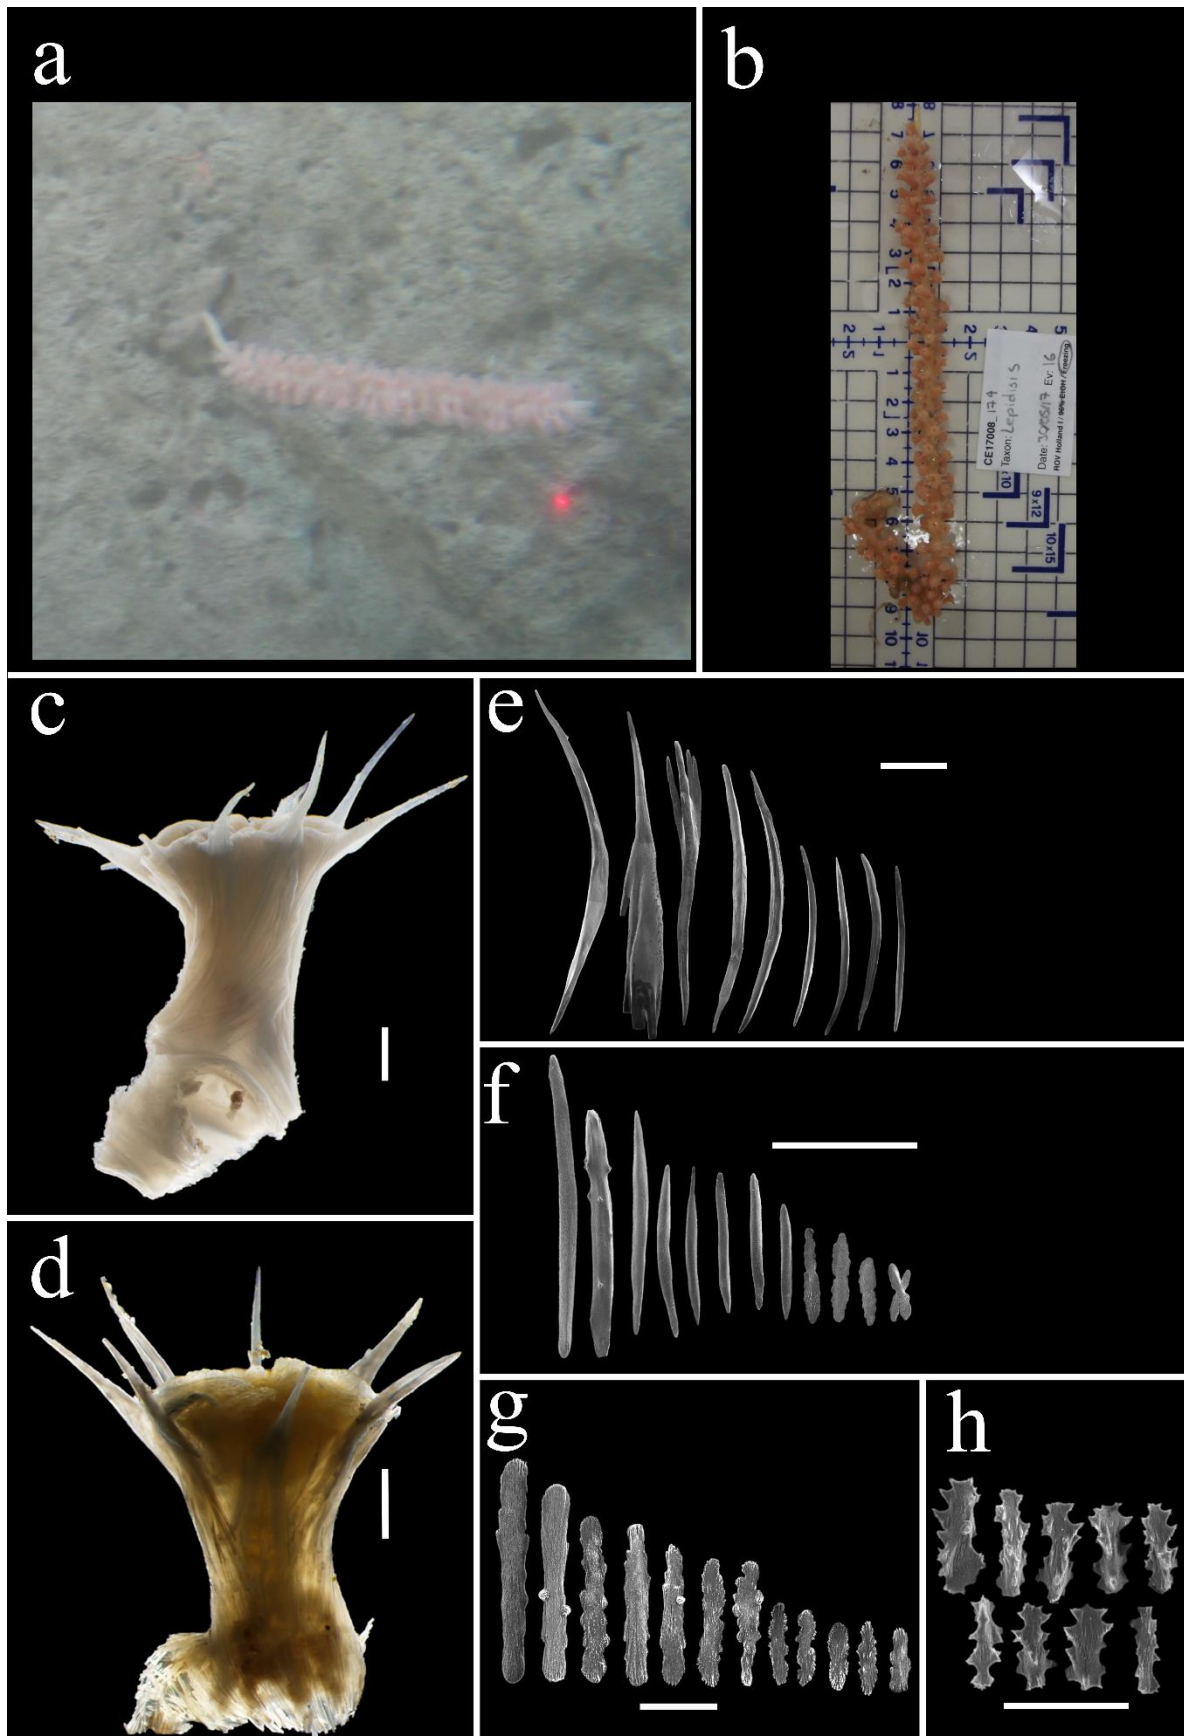

Figure S10. Morphotype 10 – Haplotype 4, voucher CE-17-174. **a**, *In-situ* image. **b**, *Ex-situ* image. **c**, Whole polyp. **d**, Whole polyp cleared in clove oil. **e**, Sclerites from the body wall. **f**, Sclerites from the coenenchyme. **g**, Sclerites from the tentacles. **h**, Sclerites from the pharynx. Scale bar: c, d, and e = 1 mm, f = 500  $\mu$ m, g and h = 100  $\mu$ m.

## **Morphotype 10 – Haplotype 6:**

### **Subclade B1**

*Vouchers:* **CE-17-146**, CE-17-163, CE-17-433, CE-17-490, CE-17-496, CE-17-501,

*Location:* Whittard Canyon between 1303 – 1468 m.

*Colony and polyp morphology:* All individuals except one are branched. It is unclear if branching occurs at the nodes or internodes. The unbranched individual (Figure S11a and b) is smaller than the others, perhaps the coral had not yet reached a size where it would branch. The coenenchyme is orange and densely populated with polyps, which are distally a darker orange. The polyps are trumpet shaped (Figure S11c and d) and the tentacles fold neatly over the mouth.

*Sclerites:* Needles ( $\approx 3.5$  mm – 1.4 mm) and scales ( $\approx 230$   $\mu$ m) are arranged obliquely and longitudinally along the body (Figure S11e). Intertentacular needles are present either as single or clusters of needles. Needles ( $\approx 1.9$  mm – 300  $\mu$ m) and scales ( $\approx 350$   $\mu$ m) are also present in the coenenchyme (Figure S11f). The sclerites in the body and coenenchyme are smooth. Thin flattened rods ( $\approx 330$   $\mu$ m – 100  $\mu$ m) are present in the tentacles (Figure S11g) and thorned rodlets ( $\approx 90$   $\mu$ m) are in the pharynx (Figure S11h).

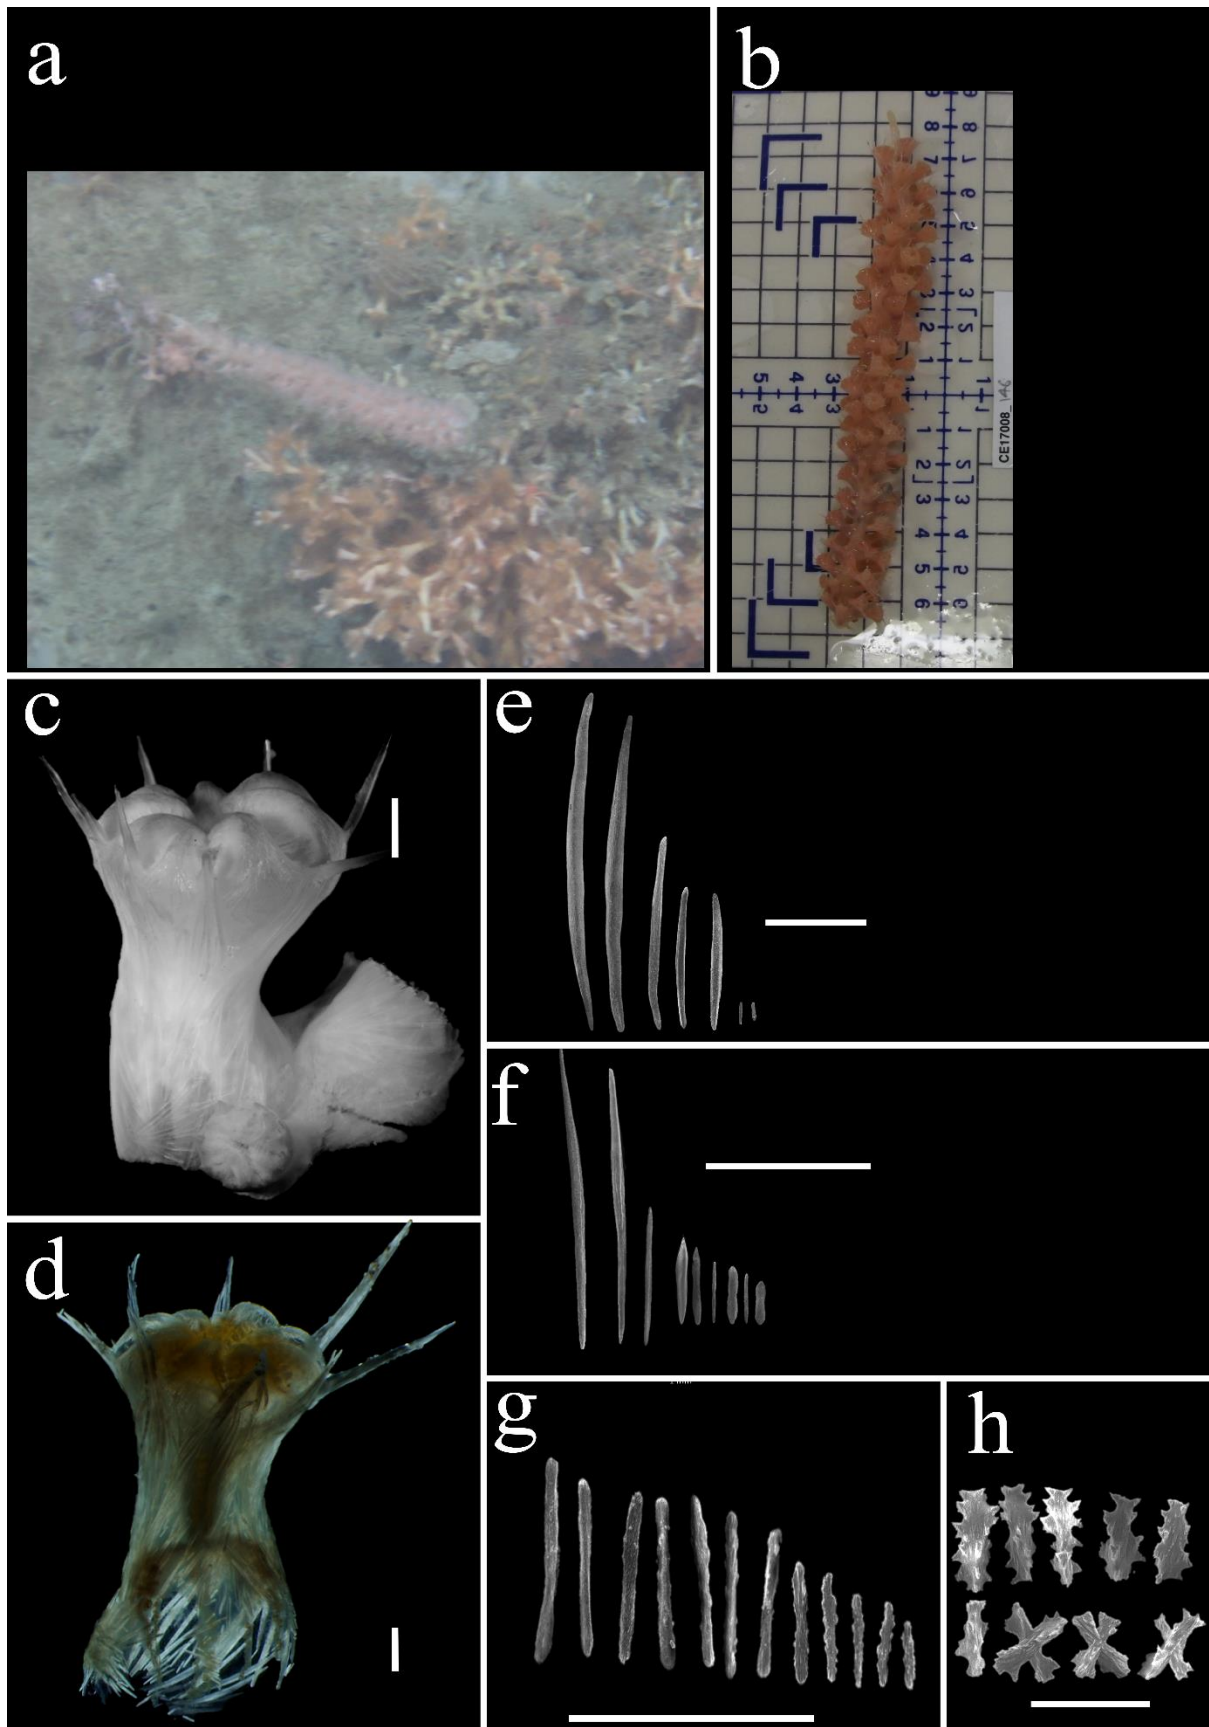

## **Morphotype 11 – Haplotype 6**

### **Subclade B1**

**Vouchers:** CE-17-424, CE-18-244

**Location:** Whittard Canyon and North Porcupine Bank between 1298 – 1300 m.

**Colony and polyp morphology:** One unbranched (Figure S12a and b) and one laterally dichotomously branched individual. Unclear if branching occurs at the nodes or internodes. Both colonies found attached to hard substrate. Coenenchyme is cream with pink polyps densely populating all sides. Polyps are barrel shaped (Figure S12c and d).

**Sclerites:** Needles ( $\approx 4.7$  mm – 1 mm) and scales ( $\approx 400$   $\mu$ m – 100  $\mu$ m) are present in the body wall (Figure S12e). Intertentacular sclerites present. Body sclerites are arranged obliquely at the bottom of the polyp before changing to a longitude orientation along the polyp about 1/3 from the proximal end of the polyp. No sclerites were observed in the coenenchyme. Flattened rods ( $\approx 300$   $\mu$ m – 100  $\mu$ m) are found in the tentacles (Figure S12g) and thorned rodlets ( $\approx 80$   $\mu$ m) in the pharynx (Figure S12h).



## **Morphotype 12 – Haplotype 3**

### **Subclade B1**

*Vouchers:* **CE-17-269**

*Location:* Whittard Canyon at 1753 m

*Colony and polyp morphology:* Unbranched whip coral (Figure S13a and b) attached to hard substrate with a small disk, same circumference as the holdfast. Coenenchyme is cream in colour with pink polyps. Polyps arise from all sides of coenenchyme. Polyps are barrel shaped (Figure S13c and d) and are swollen proximally. Tentacles fold neatly over the mouth.

*Sclerites:* Needles ( $\approx 4.75$  mm – 2.5 mm) and scales ( $\approx 250$   $\mu$ m) are obliquely or longitudinally arranged along the polyp body (Figure S13e). Scales commonly pinched at the waist. Intertentacular needles are present. Body sclerites are smooth and arranged obliquely along the body. No sclerites are present in the coenenchyme. Flattened rods are present in the tentacles ( $\approx 220$   $\mu$ m – 60  $\mu$ m, Figure S13g). Thorned rodlets ( $\approx 70$   $\mu$ m, Figure S13h) are present in the pharynx.



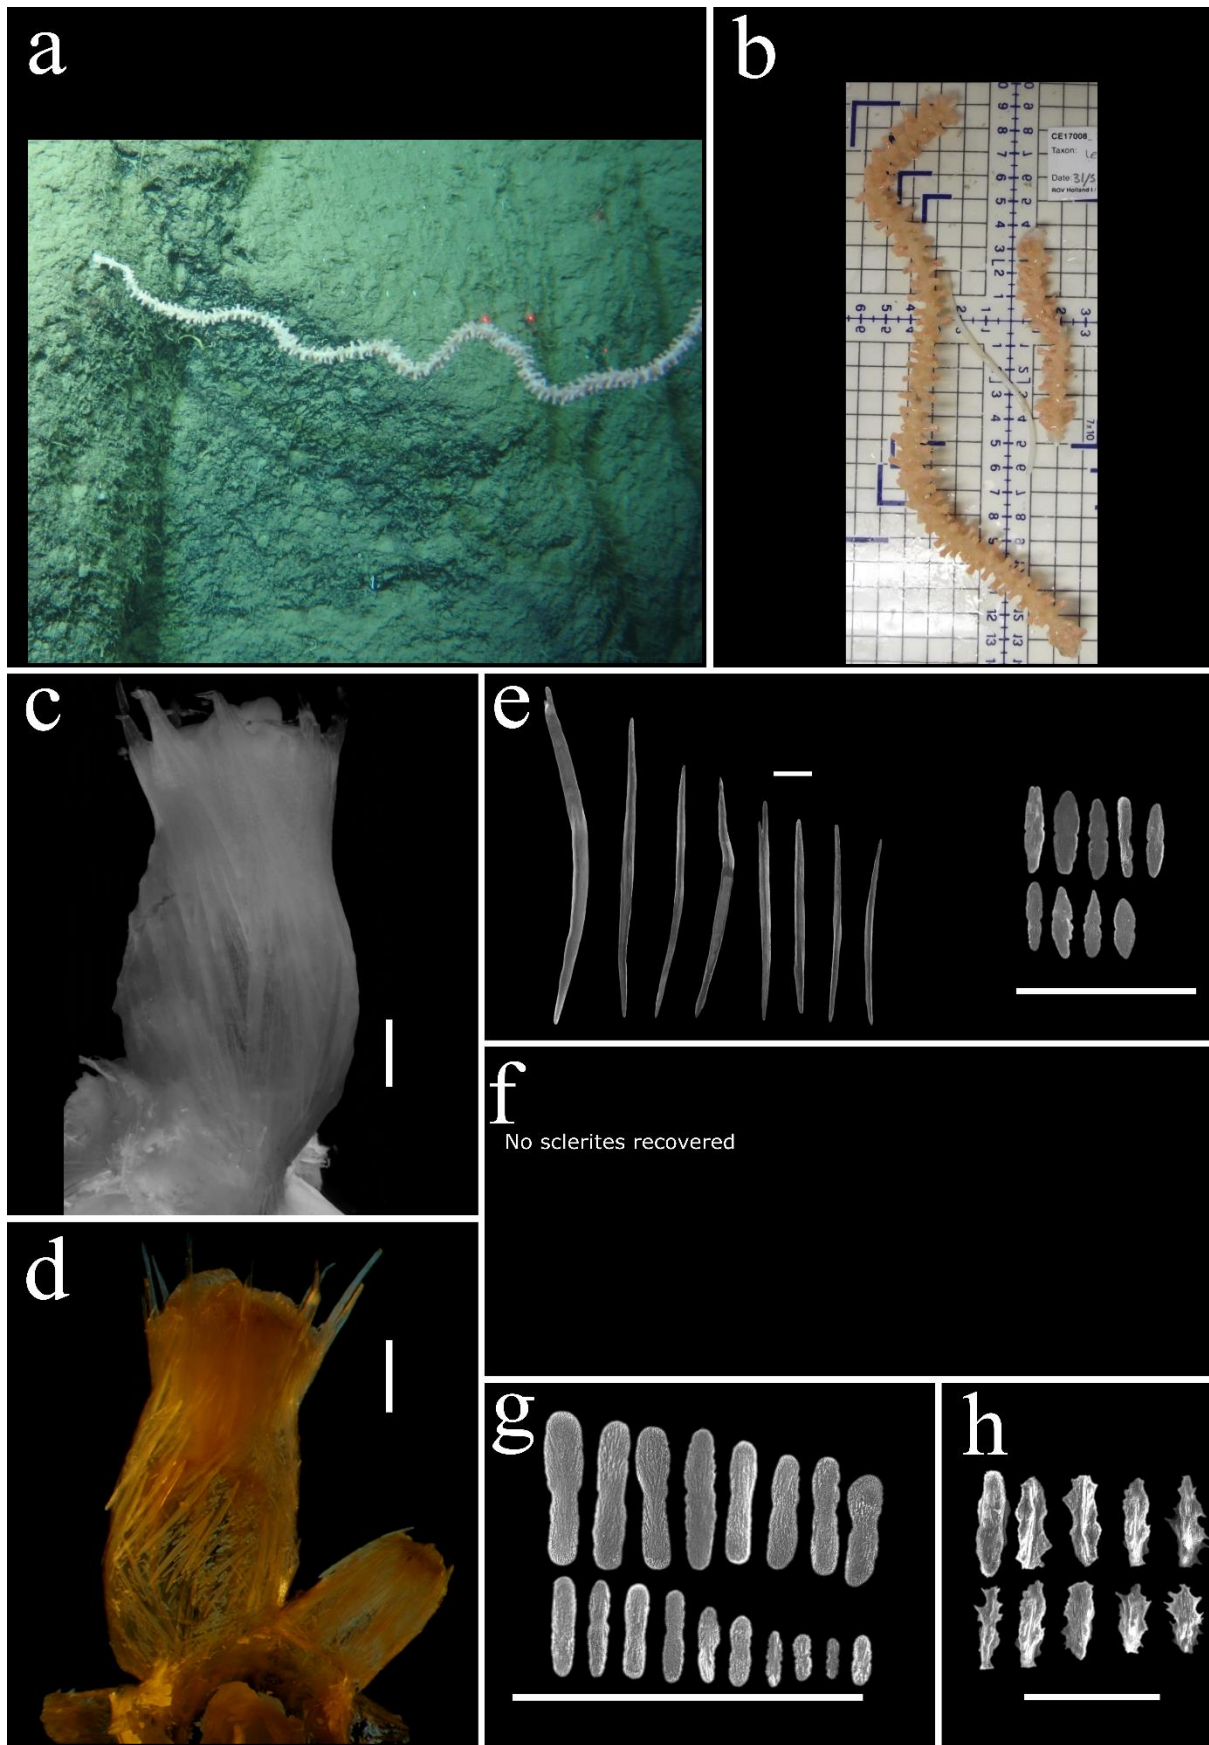

Figure S13. Morphotype 12 – Haplotype 3, voucher CE-17-269. **a**, *In-situ* image. **b**, *Ex-situ* image. **c**, Whole polyp. **d**, Whole polyp cleared in clove oil. **e**, Sclerites from the body wall. **f**, Sclerites from the coenenchyme. **g**, Sclerites from the tentacles. **h**, Sclerites from the pharynx. Scale bar: c and d = 1 mm, e and g = 500  $\mu$ m, and h = 100  $\mu$ m.



### **Morphotype 13 – Haplotype 5**

*Vouchers:* **CE-17-206**, CE-17-550, CE-18-126, CE-18-409

*Location:* Whittard Canyon and North Porcupine Bank between 1776 – 2080 m.

*Colony and polyp morphology:* Unbranched whip corals (Figure S14a and b) attached to hard substrate with a circular disk. The coenenchyme is cream in colour and polyps, which are distally pink (Figure S14c and d), originate on all sides. The tentacles sit on top of mouth, forming an hourglass shaped polyp.

*Sclerites:* Needles ( $\approx 3.5$  mm – 1.7 mm) and scales ( $\approx 300$   $\mu$ m) are arranged both obliquely and longitudinally along the polyp body wall (Figure S14e). Intertentacular needles present. Needles ( $\approx 2.1$  mm – 370  $\mu$ m) and scales ( $\approx 290$   $\mu$ m – 170  $\mu$ m) are also present in the coenenchyme (Figure S14f). Sclerites found in the body and coenenchyme are smooth. Flattened rods ( $\approx 275$   $\mu$ m – 80  $\mu$ m) are present in the tentacles (Figure S14g) and thorned rodlets ( $\approx 70$   $\mu$ m) in the pharynx (Figure S14h).

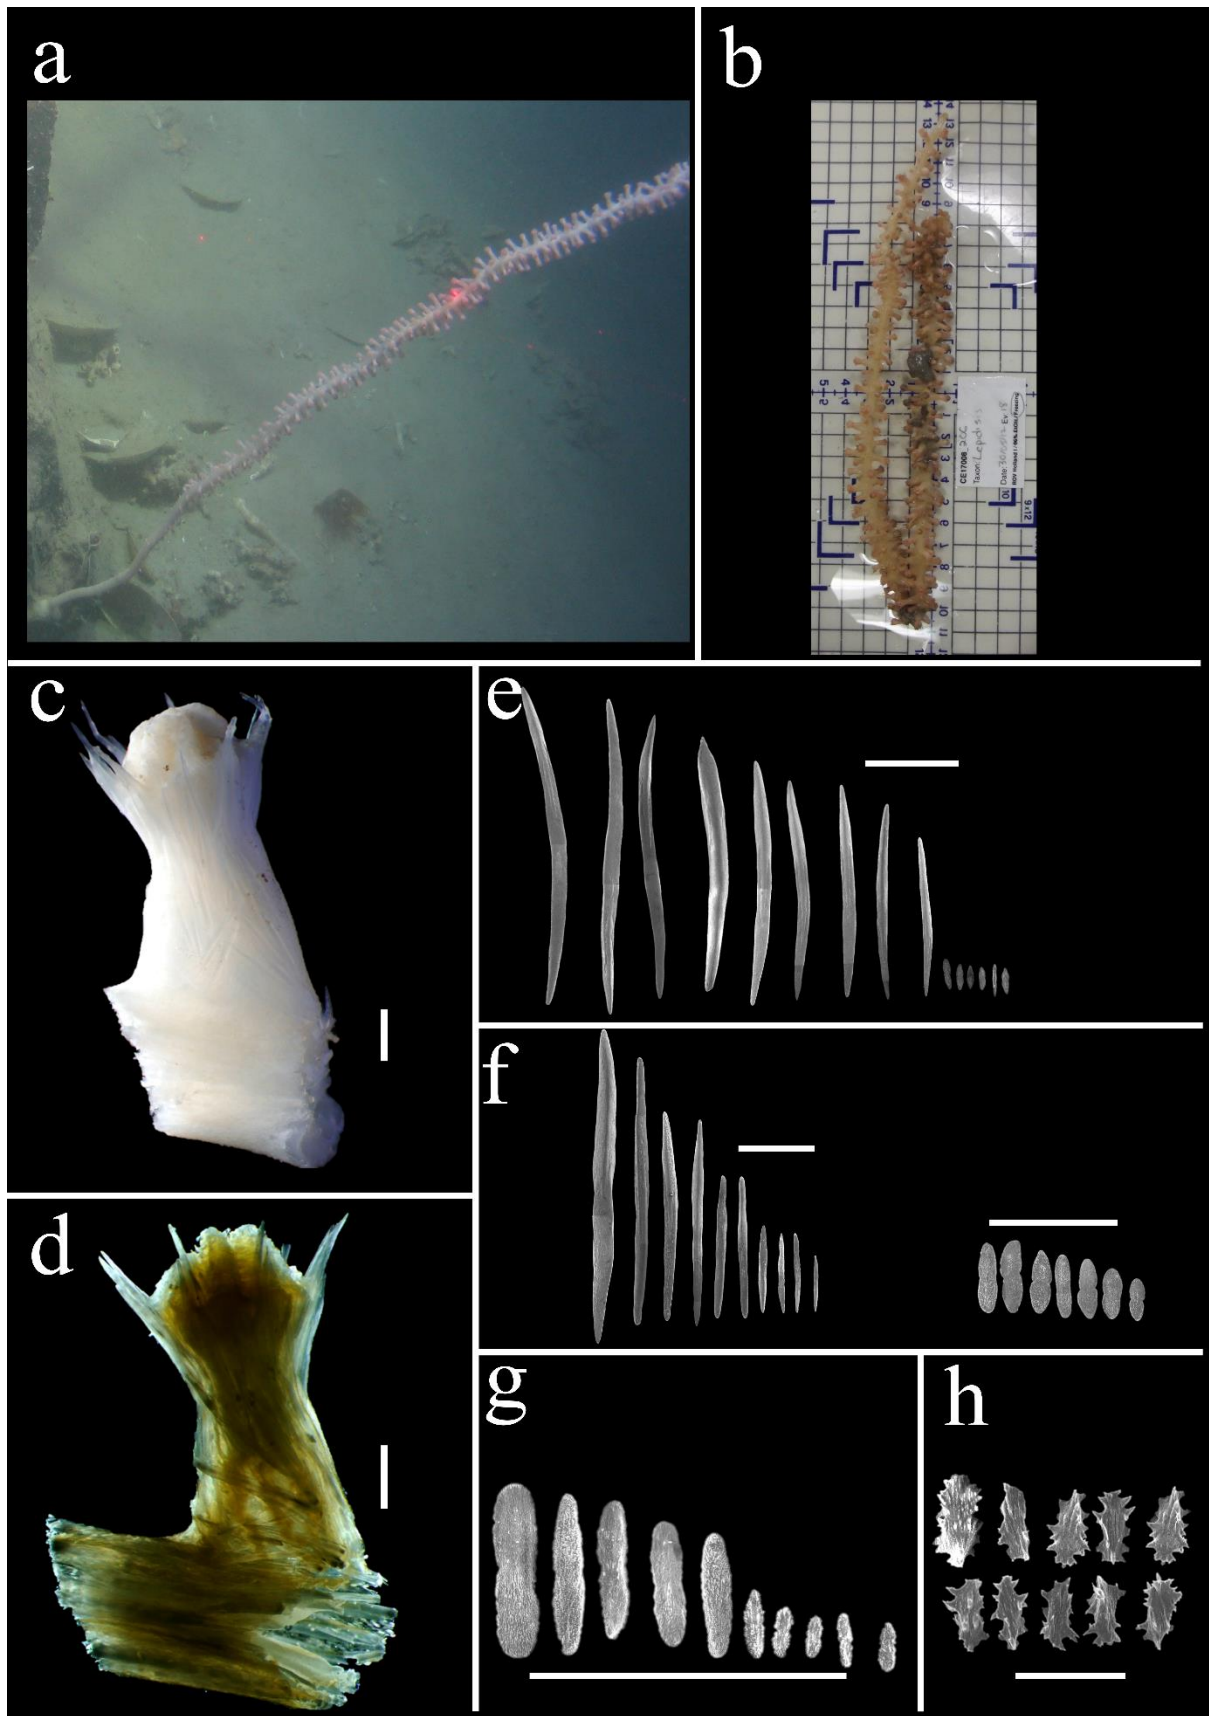

Figure S14. Morphotype 13 – Haplotype 5, voucher CE-17-206. **a**, *In-situ* image. **b**, *Ex-situ* image. **c**, Whole polyp. **d**, Whole polyp cleared in clove oil. **e**, Sclerites from the body wall. **f**, Sclerites from the coenenchyme. **g**, Sclerites from the tentacles. **h**, Sclerites from the pharynx. Scale bar: c, d, and e = 1 mm, f and g = 500  $\mu$ m, and h = 100  $\mu$ m.

## **Morphotype 14 – Haplotype 23:**

### **Subclade F1**

*Vouchers:* **CE-17-216**

*Location:* Whittard Canyon at 1971 m.

*Colony and polyp morphology:* Unbranched whip coral (Figure S15a and b) found attached to hard substrate by a white circular disk. Cream coenenchyme with distally pink polyps. Polyps are long, narrow, and flare at the distal end towards the tentacles (Figure S15c and d). Tentacles are folded over mouth.

*Sclerites:* Needles and rods ( $\approx 3.4$  mm – 300  $\mu$ m) are present in the body (Figure S15e) and coenenchyme ( $\approx 1.7$  mm – 150  $\mu$ m, Figure S15f). Blunt end rods ( $\approx 600$   $\mu$ m – 330  $\mu$ m) and flattened rods ( $\approx 300$   $\mu$ m – 90  $\mu$ m) with an irregular margin are found in the tentacles (Figure S15g). Thorned rodlets ( $\approx 90$   $\mu$ m) are present in the pharynx (Figure S15h). Sclerites located in the body, coenenchyme and tentacles have a granulated surface with ridges and grooves at one or both ends of the needles and rods.

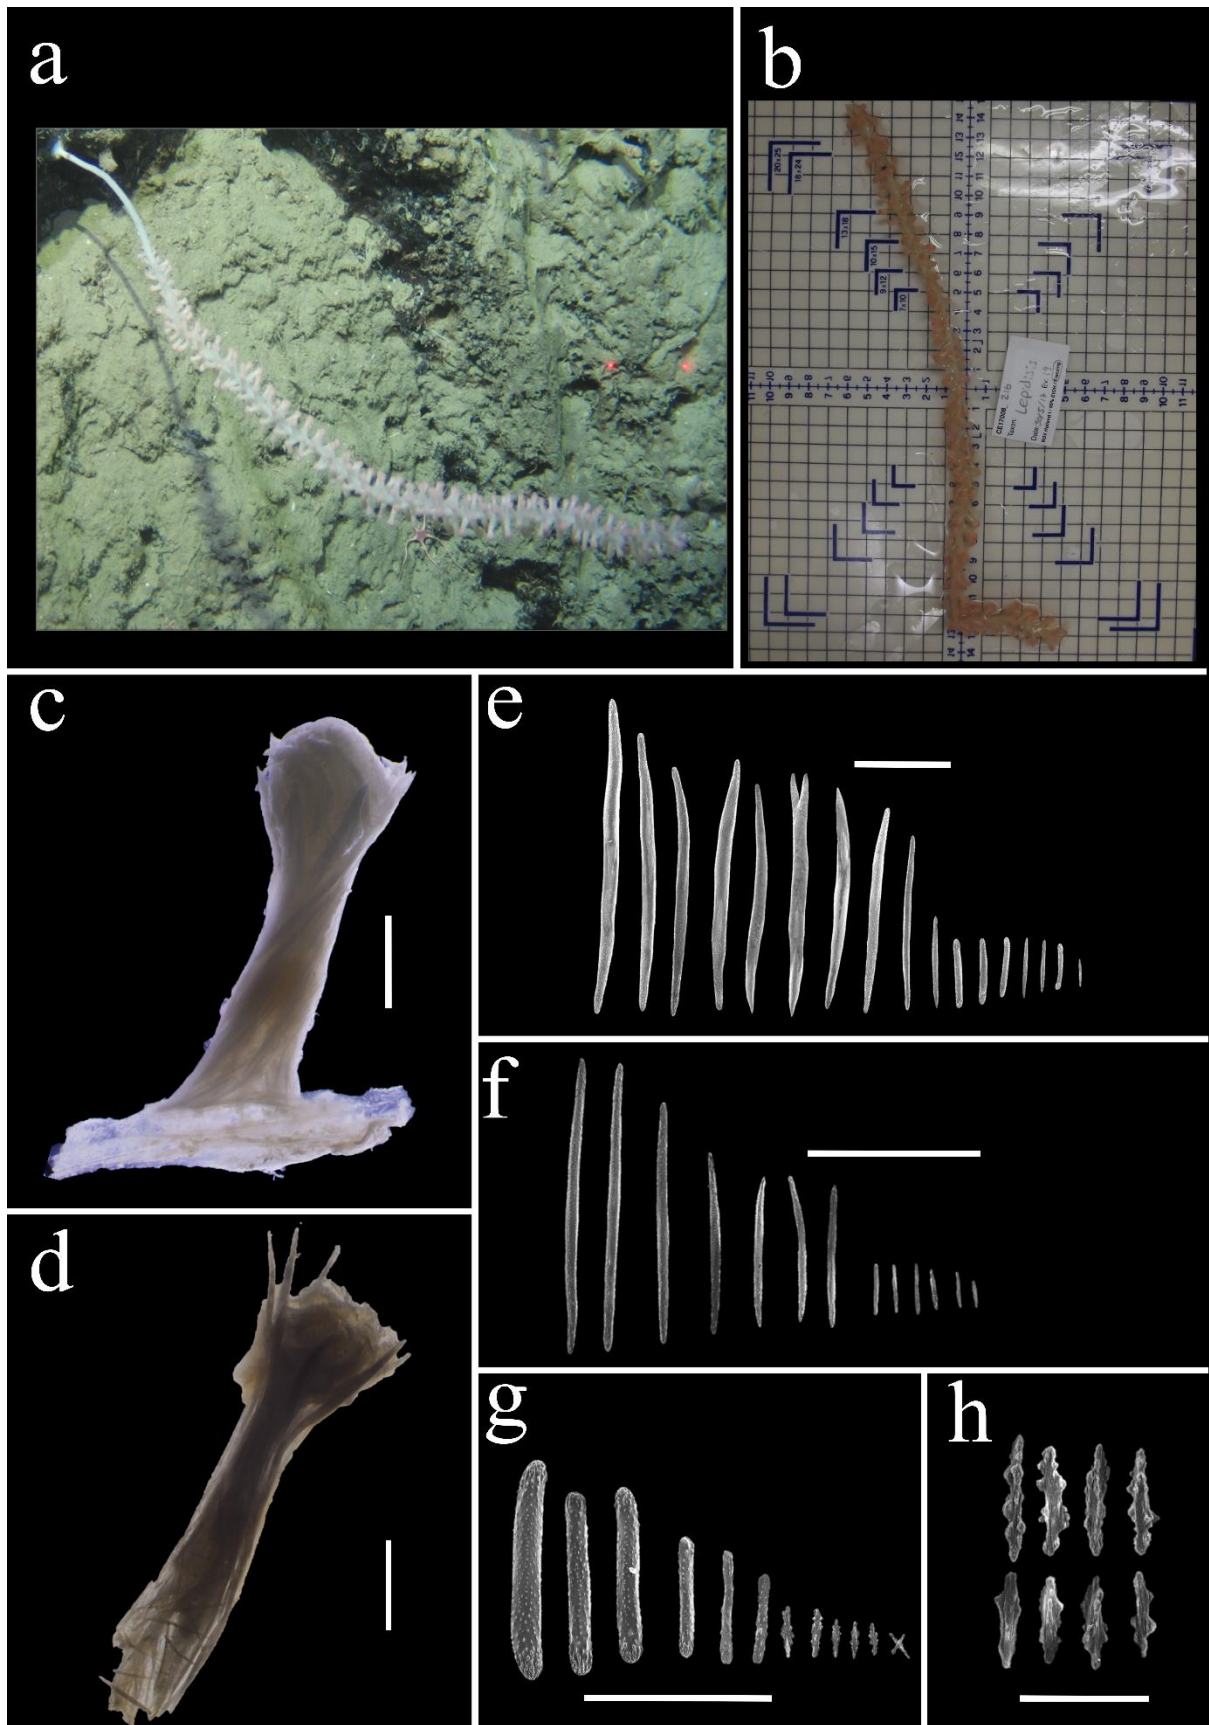

Figure S15. Morphotype 14 – Haplotype 23, voucher CE-17-216. **a**, *In-situ* image. **b**, *Ex-situ* image. **c**, Whole polyp. **d**, Whole polyp cleared in clove oil. **e**, Sclerites from the body wall. **f**, Sclerites from the coenenchyme. **g**, Sclerites from the tentacles. **h**, Sclerites from the pharynx. Scale bar: c, d, e, and f = 1 mm, g = 500 μm, and h = 100 μm.

## **Morphotype 15 – Haplotype 12**

### **Subclade I1**

*Vouchers:* CE-18-197, **CE-18-203**

*Location:* Whittard Canyon between 2031 – 2054 m.

*Colony and polyp morphology:* Colonies branch dichotomously, but not often (Figure S16a and b). Coenenchyme is largely transparent with polyps originating primarily from alternating sides of the coenenchyme. Polyps are both perpendicular to the axis and L-shaped (Figure S16c and d). Polyps are cylindrical in shape with the tentacles loosely gathered over the mouth.

*Sclerites:* Needles ( $\approx 4.8$  mm – 2.4 mm) scarcely populate the body wall (Figure S16e) occurring only in the distal half of the polyp. Body sclerites are granulated and are arranged both longitudinally and obliquely. Large sclerites project past the base of the tentacles. No sclerites were observed in the coenenchyme. Flattened rods ( $\approx 200$   $\mu$ m – 60  $\mu$ m) are present in the tentacles (Figure S16g) and thorned rodlets ( $\approx 60$   $\mu$ m) are found in the pharynx (Figure S16h).



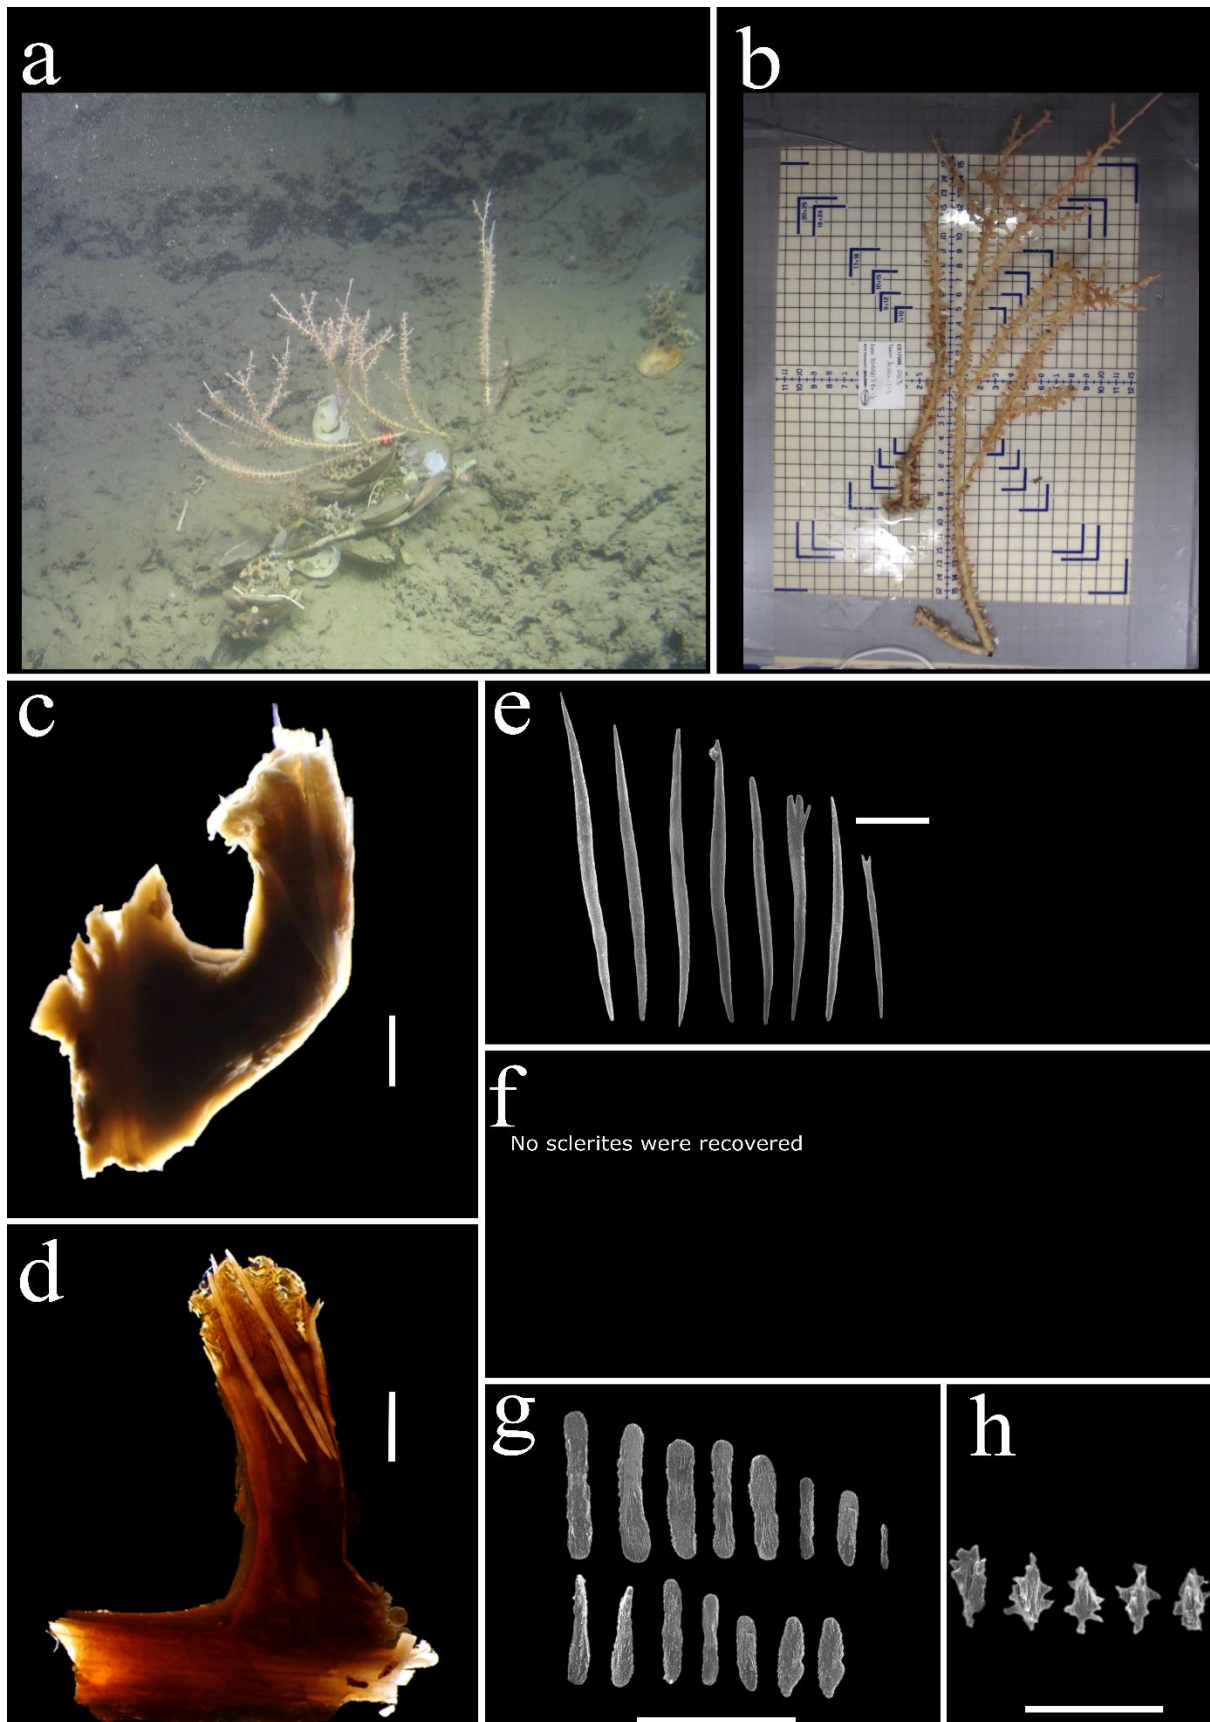

## **Morphotype 16 – Haplotype 13**

### **Clade II**

*Vouchers:* **CE-17-234**

*Location:* Whittard Canyon at 1852 m.

*Colony and polyp morphology:* Di- and trichotomous branching occurring at the nodes (Figure S17a and b). Attached to hard substrate. The coenenchyme appears transparent with polyps, orange to pink, originating from two opposing sides of the coenenchyme. Polyps are slightly wider distally (Figure S17c and d). Tentacles appear fully extended.

*Sclerites:* Lightly granulated needles ( $\approx 6.3$  mm – 2.1 mm) arranged longitudinally along the body (Figure S17e), primarily concentrated distally. Some sclerites project past the base of the tentacles. No sclerites are observed in the coenenchyme. Flattened rods ( $\approx 280$   $\mu$ m – 80  $\mu$ m) are present in the tentacles (Figure S17f) and thorned rodlets ( $\approx 140$   $\mu$ m – 65  $\mu$ m) are present in the pharynx (Figure S17g).

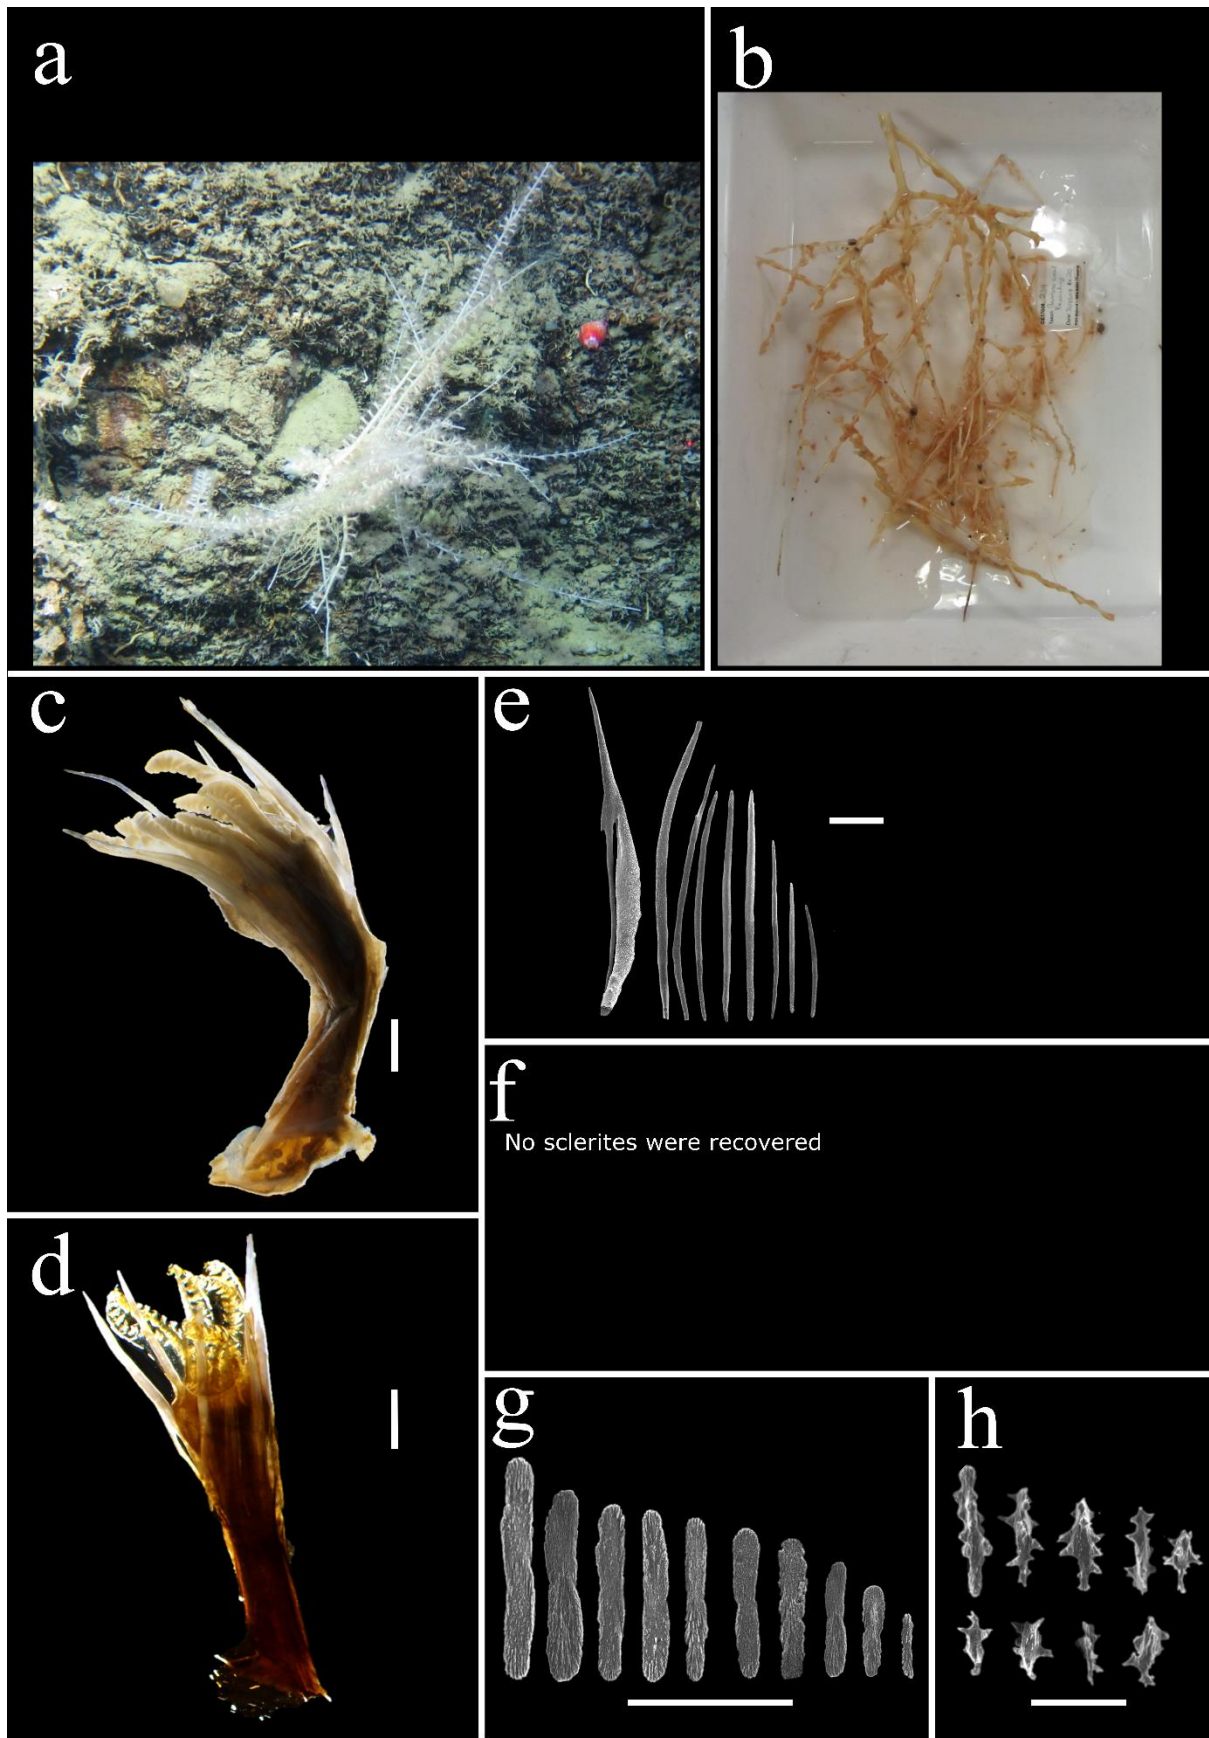

Figure S17. Morphotype 16 – Haplotype 13, voucher CE-17-234. **a**, *In-situ* image. **b**, *Ex-situ* image. **c**, Whole polyp. **d**, Whole polyp cleared in clove oil. **e**, Sclerites from the body wall. **f**, Sclerites from the coenenchyme. **g**, Sclerites from the tentacles. **h**, Sclerites from the pharynx. Scale bar: c, d, and e = 1 mm, g = 200  $\mu$ m, and h = 100  $\mu$ m.



## **Morphotype 17 – Haplotype 13**

### **Subclade I1**

Vouchers: **CE-18-063**,

Location: North Porcupine Bank at 1288 m

*Colony and polyp morphology:* Di- and trichotomous branching from the nodes occurring in multiple planes forming a bush (Figure S18a and b). Attached to scleractinian coral skeleton. Coenenchyme appears transparent and polyps, orange to pink in colour, originate on two opposing sides of the coenenchyme. Polyps are slightly distally flared to form a funnel shape (Figure S18c and d). The tentacles are relaxed and folded over the mouth.

*Sclerites:* Needles arranged longitudinally along the body ( $\approx 3.9 \text{ mm} - 790 \mu\text{m}$ , Figure S18e) and coenenchyme ( $\approx 3.3 \text{ mm} - 320 \mu\text{m}$ , Figure S18f). Intertentacular sclerites present between each pair of tentacles. Sclerites in the body and coenenchyme are lightly granulated. Flattened rodlets ( $\approx 200 \mu\text{m} - 90 \mu\text{m}$ ) are present in the tentacles (Figure S18g) and thorny rods are present in the pharynx ( $\approx 110 \mu\text{m} - 70 \mu\text{m}$ , Figure S18h).

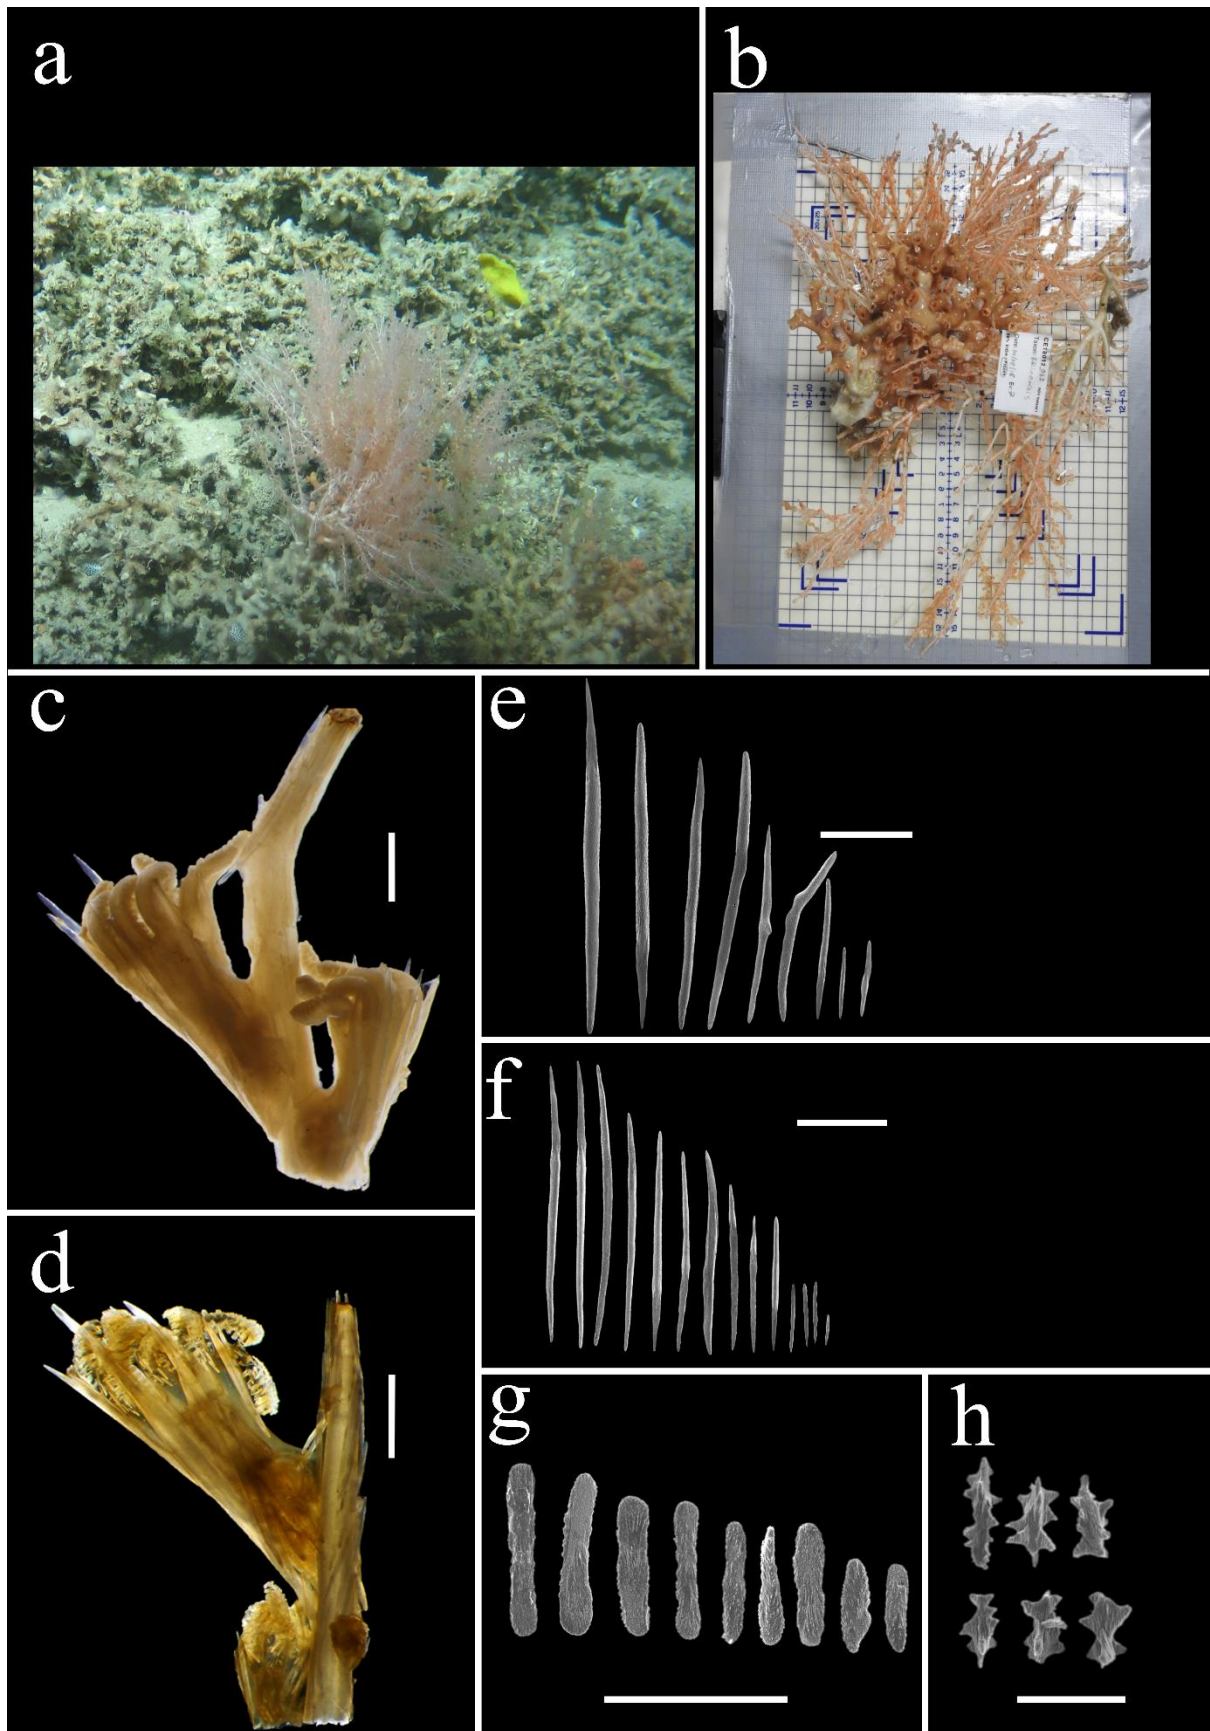

Figure S18. Morphotype 17 – Haplotype 13, voucher CE-18-063. **a**, *In-situ* image. **b**, *Ex-situ* image. **c**, Whole polyp. **d**, Whole polyp cleared in clove oil. **e**, Sclerites from the body wall. **f**, Sclerites from the coenenchyme. **g**, Sclerites from the tentacles. **h**, Sclerites from the pharynx. Scale bar: c, d, e, and f = 1 mm, g = 200  $\mu$ m, and h = 100  $\mu$ m.

**Morphotype 17 – Haplotype 14:**

*Vouchers:* CE-18-058, CE-18-067, **CE-18-110**, CE-18-111, CE-18-113, CE-18-639, CE-18-658, CE-18-661.

*Location:* North Porcupine Bank between 1290 – 1483 m.

*Colony and polyp morphology:* Di- and trichotomous branching from the nodes in one or multiple planes forming a fan or bush colony (Figure S19a and b). Coenenchyme is thin and transparent with polyps, orange to pink, originating from two opposing sides of the coenenchyme. Polyps are funnel shaped, wider distally (Figure S19c and d). Tentacles folded loosely over mouth.

*Sclerites:* Rods arranged longitudinally along the polyp body ( $\approx 1.4$  mm – 150  $\mu$ m, Figure S19 E) and coenenchyme ( $\approx 2.1$  mm – 410  $\mu$ m, Figure S19f). Body and coenenchyme sclerites can be lightly granulated. Some body sclerites project past the base of the tentacles between tentacles. Flattened rods ( $\approx 190$   $\mu$ m – 80  $\mu$ m) are present in the tentacles (Figure S19g). No sclerites are found in the pharynx.

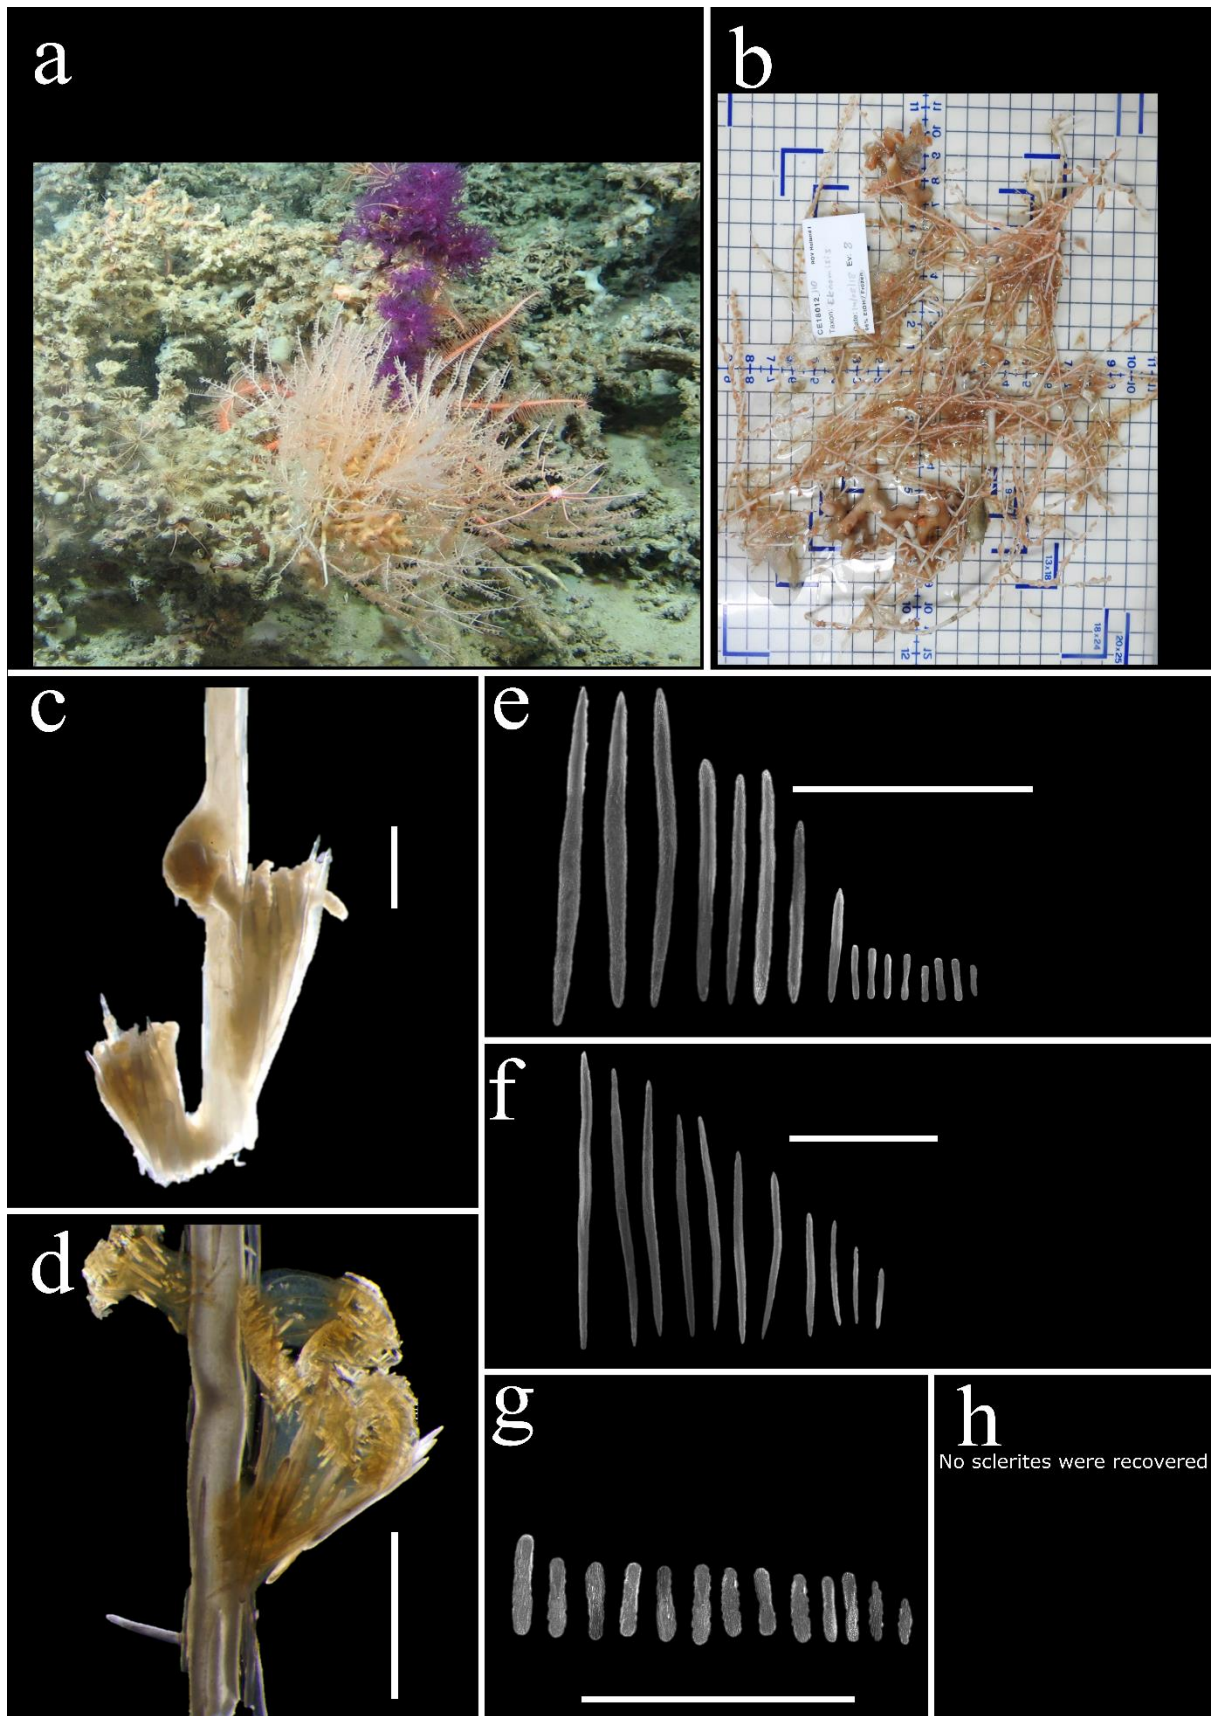

Figure S19. Morphotype 17 – Haplotype 14, voucher CE-18-110. **a**, *In-situ* image. **b**, *Ex-situ* image. **c**, Whole polyp. **d**, Whole polyp cleared in clove oil. **e**, Sclerites from the body wall. **f**, Sclerites from the coenenchyme. **g**, Sclerites from the tentacles. **h**, Sclerites from the pharynx. Scale bar: c, d, e, and f = 1 mm, and g = 500  $\mu$ m.

## **Morphotype 18 – Haplotype 13**

### **Subclade I1**

Vouchers: **CE-18-415**

*Location:* North Porcupine Bank at 1774 m.

*Colony and polyp morphology:* Di- and trichotomous branching from the nodes forming a loose bush colony (Figure S20a and b). The coenenchyme is seemingly transparent and populated with orange polyps, originating from opposing sides of the coenenchyme. Polyps are funnel shaped, distally wider (Figure S20c and d). Tentacles are loosely folded over the mouth.

*Sclerites:* Needles and rods are arranged obliquely along the polyp body ( $\approx 4.13 - 1.7$  mm, Figure S20 E). Intertentacular sclerites present. Rods and spindles are present in the coenenchyme ( $\approx 1.4$  mm – 310  $\mu\text{m}$ , Figure S20f). Body and coenenchyme sclerites are very lightly granulated. Flattened rods ( $\approx 140 \mu\text{m} - 100 \mu\text{m}$ ) are present in the tentacles (Figure S20g) and thorned rodlets ( $\approx 70 \mu\text{m}$ ) are present in the pharynx (Figure S20h).



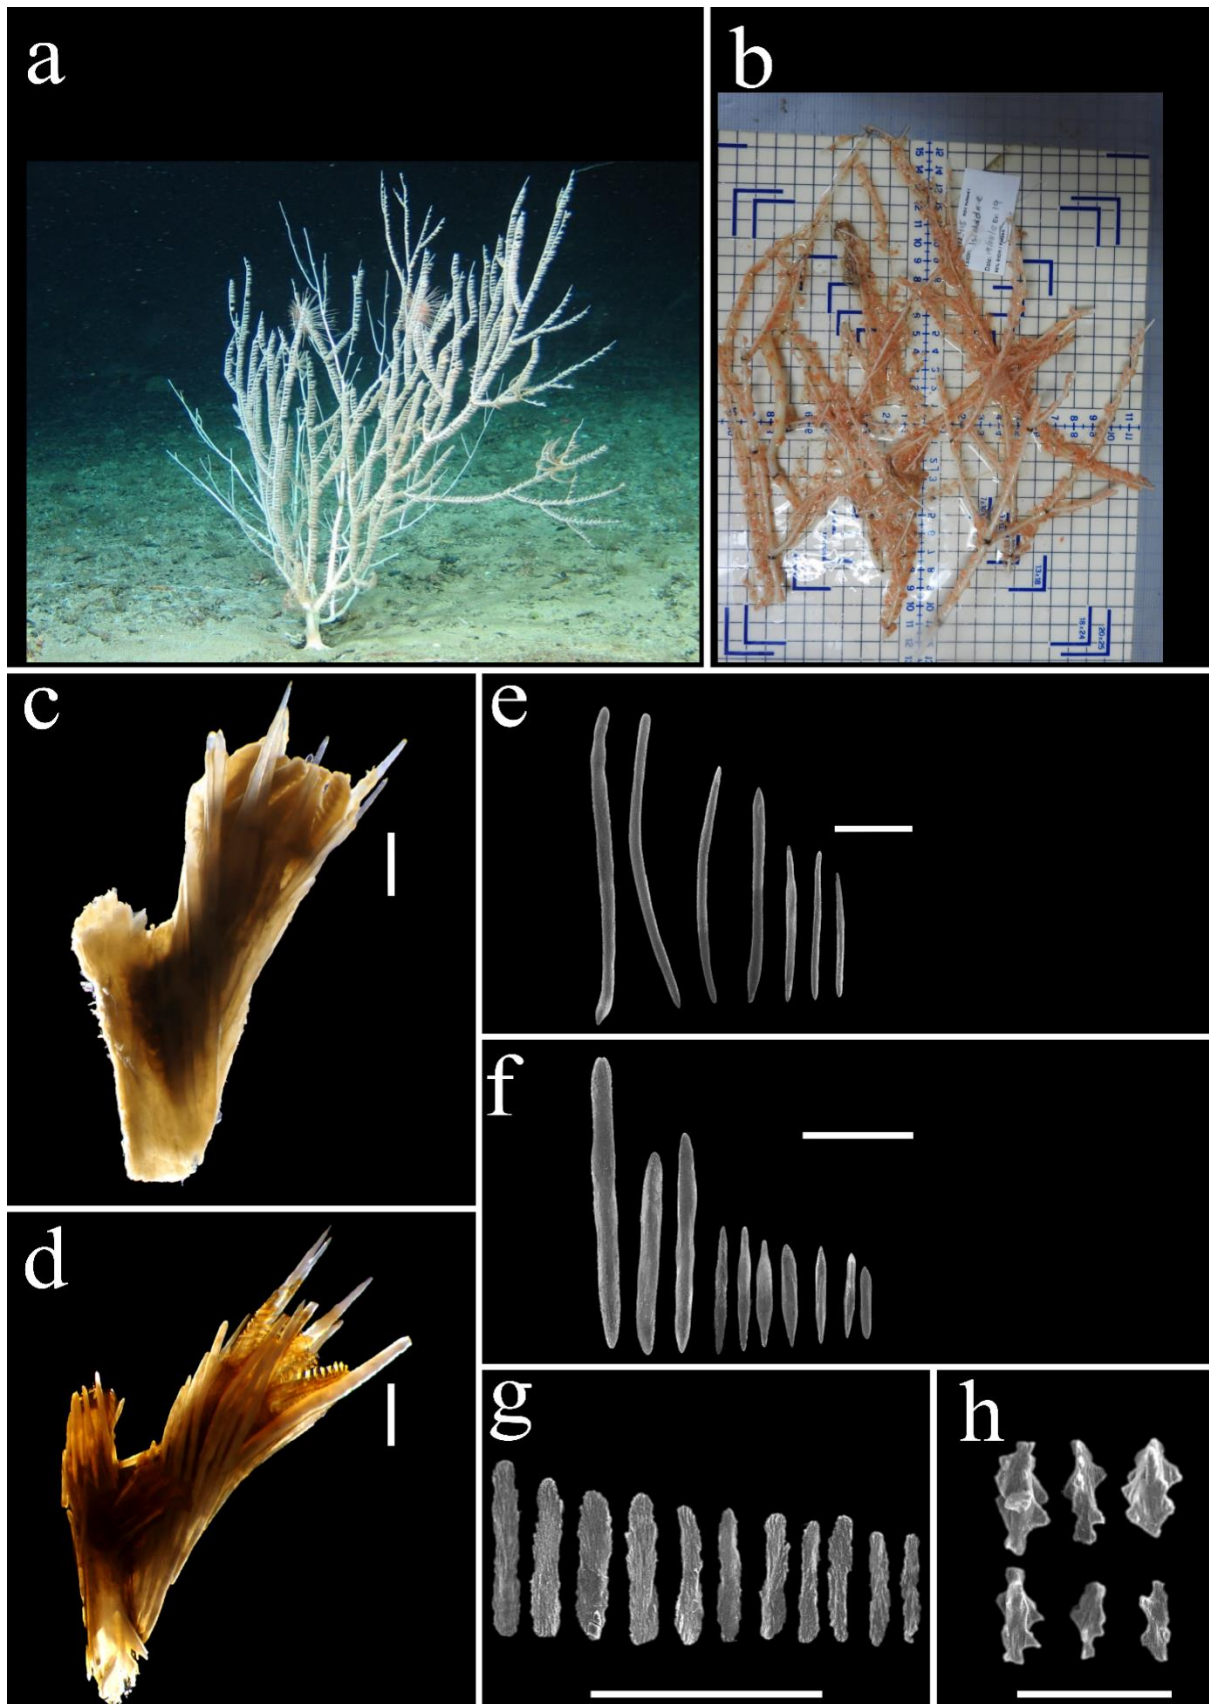

Figure S20. Morphotype 18 – Haplotype 13, voucher CE-18-415. **a**, *In-situ* image. **b**, *Ex-situ* image. **c**, Whole polyp. **d**, Whole polyp cleared in clove oil. **e**, Sclerites from the body wall. **f**, Sclerites from the coenenchyme. **g**, Sclerites from the tentacles. **h**, Sclerites from the pharynx. Scale bar: c, d, and e = 1 mm, f = 500  $\mu$ m, g = 200  $\mu$ m, and h = 100  $\mu$ m.



## **Morphotype 19 – Haplotype 15**

### **Subclade I1**

*Vouchers:* **CE-17-125**, CE-17-511

*Location:* Whittard Canyon between 1341 – 1473 m.

*Colony and polyp morphology:* Unbranched whip coral (Figure S21a and b) attached to scleractinian rubble. Coenenchyme appears transparent with polyps, orange to pink, originating from all sides of the axis. Polyps can be either funnel shaped, wider at the distal end, or they are cylindrical with very little change in width between distal and proximal ends (Figure S21c and d).

*Sclerites:* Needles and rods are arranged both longitudinally and obliquely along the body ( $\approx 4.7$  mm – 2.6 mm, Figure S21e), some project past the base of the tentacles between tentacle pairs. Needles and rods are found in the coenenchyme ( $\approx 1.2$  mm – 710  $\mu$ m, Figure S21f). Flattened rods ( $\approx 230$   $\mu$ m – 80  $\mu$ m) are observed in the tentacles (Figure S21g) and thorned rodlets ( $\approx 70$   $\mu$ m) are present in the pharynx (Figure S21h).

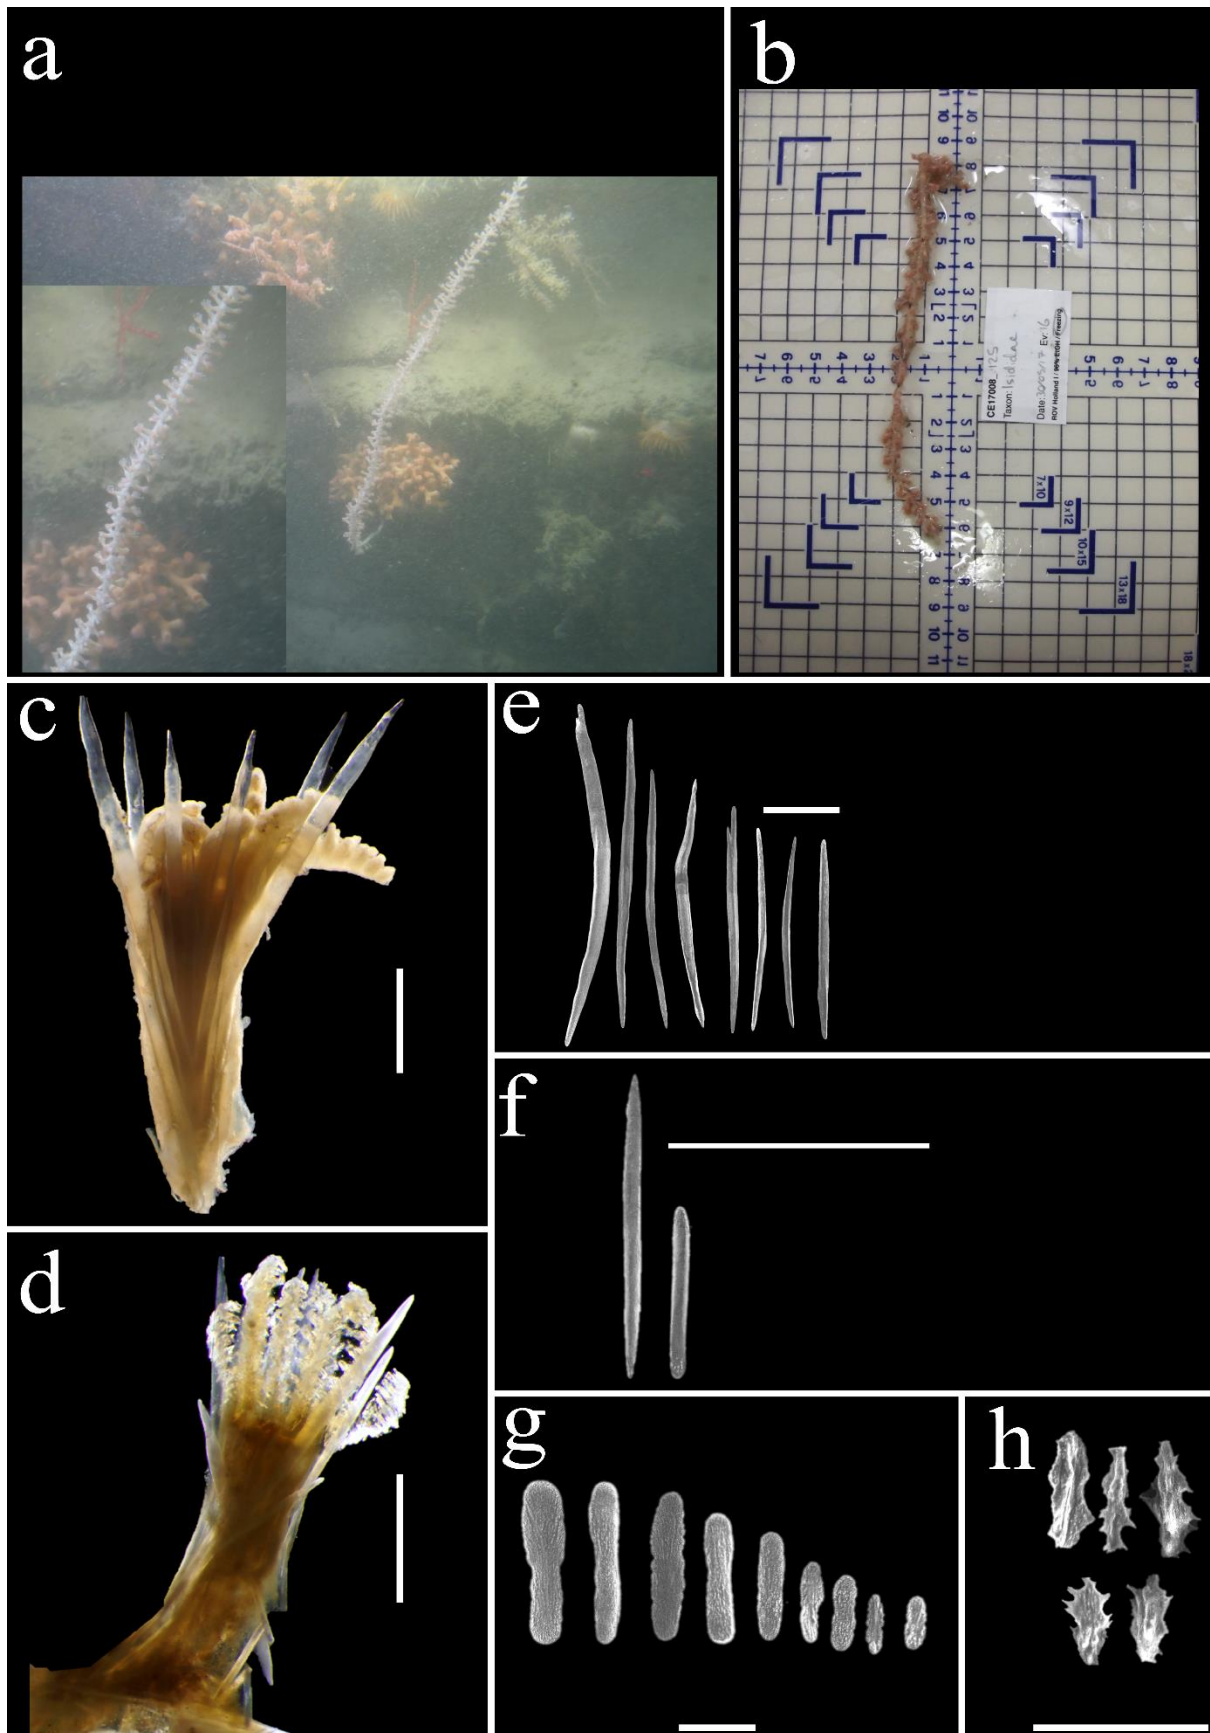

## **Morphotype 20 – Haplotype 18**

### **Subclade J3**

*Vouchers:* **CE-17-276**

*Location:* Whittard Canyon at 1695 m

*Colony morphology:* branching occurs dichotomously from the node (and internode?) in a single plane to form a fan shaped colony (Figure S22a and b).

*Sclerites:* Not examined due to missing material.

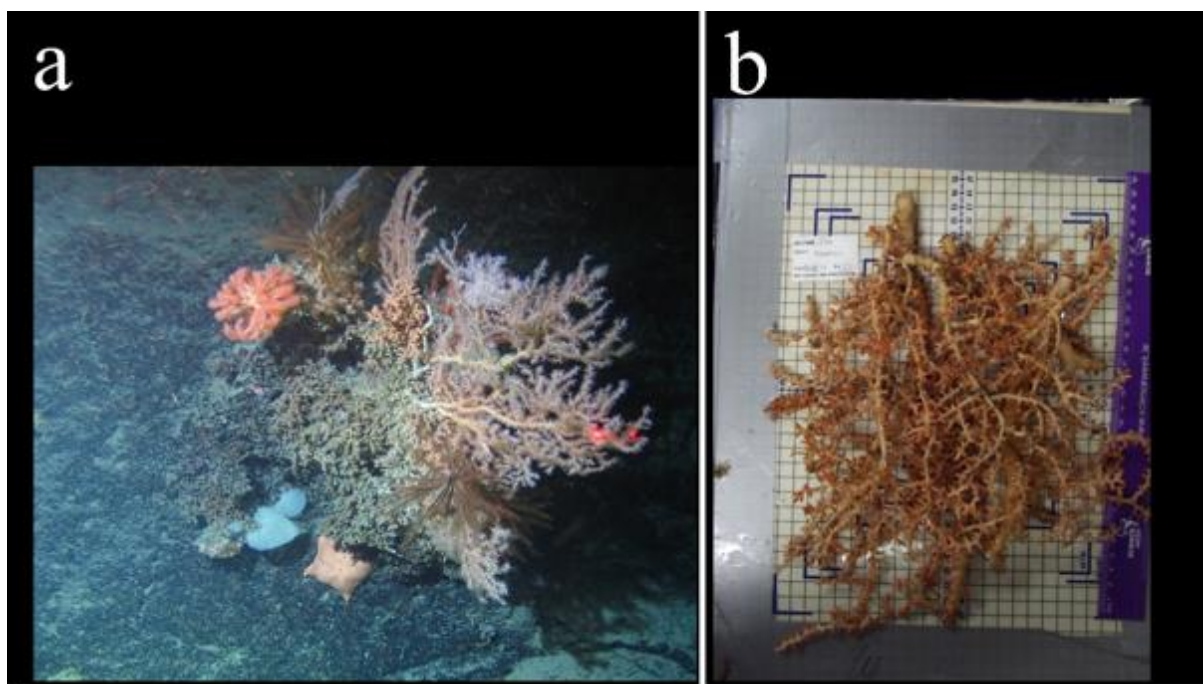

Figure S22. Morphotype 20 – Haplotype 18. voucher CE-17-276 **A**, *In-situ* image. **B**, *Ex-situ* image.

## **Morphotype 21 – Haplotype 19**

### **Subclade J3**

*Vouchers:* **CE-17-274**, CE-17-284, CE-17-289, CE-17-348, CE-17-384

*Location:* Whittard Canyon between 1599 – 1685 m.

*Colony and polyp morphology:* Planar colonies that branch dichotomously forming a fan (Figure S23a and b). Polyps are trumpet shaped (Figure S23c and d), orange to pink in colour, and originate from all sides of the coenenchyme.

*Sclerites:* Spindles and rods are found in arranged longitudinally in the body ( $\approx 2\text{ mm} - 630\text{ }\mu\text{m}$ , Figure S23e). Fusiform sclerites project past the base of the tentacles between each tenacle pair. Body sclerites were arranged longitudinally along the polyp body. Spindles and clubs are found in the coenenchyme ( $\approx 2.8\text{ mm} - 730\text{ }\mu\text{m}$ , Figure S23f). Flattened rods are found in the tentacles ( $\approx 230\text{ }\mu\text{m} - 45\text{ }\mu\text{m}$ , Figure S23g) and pharynx ( $\approx 300\text{ }\mu\text{m}$ , Figure S23h). All body and coenenchyme sclerites are always granulated and sometimes finely striated in the middle.

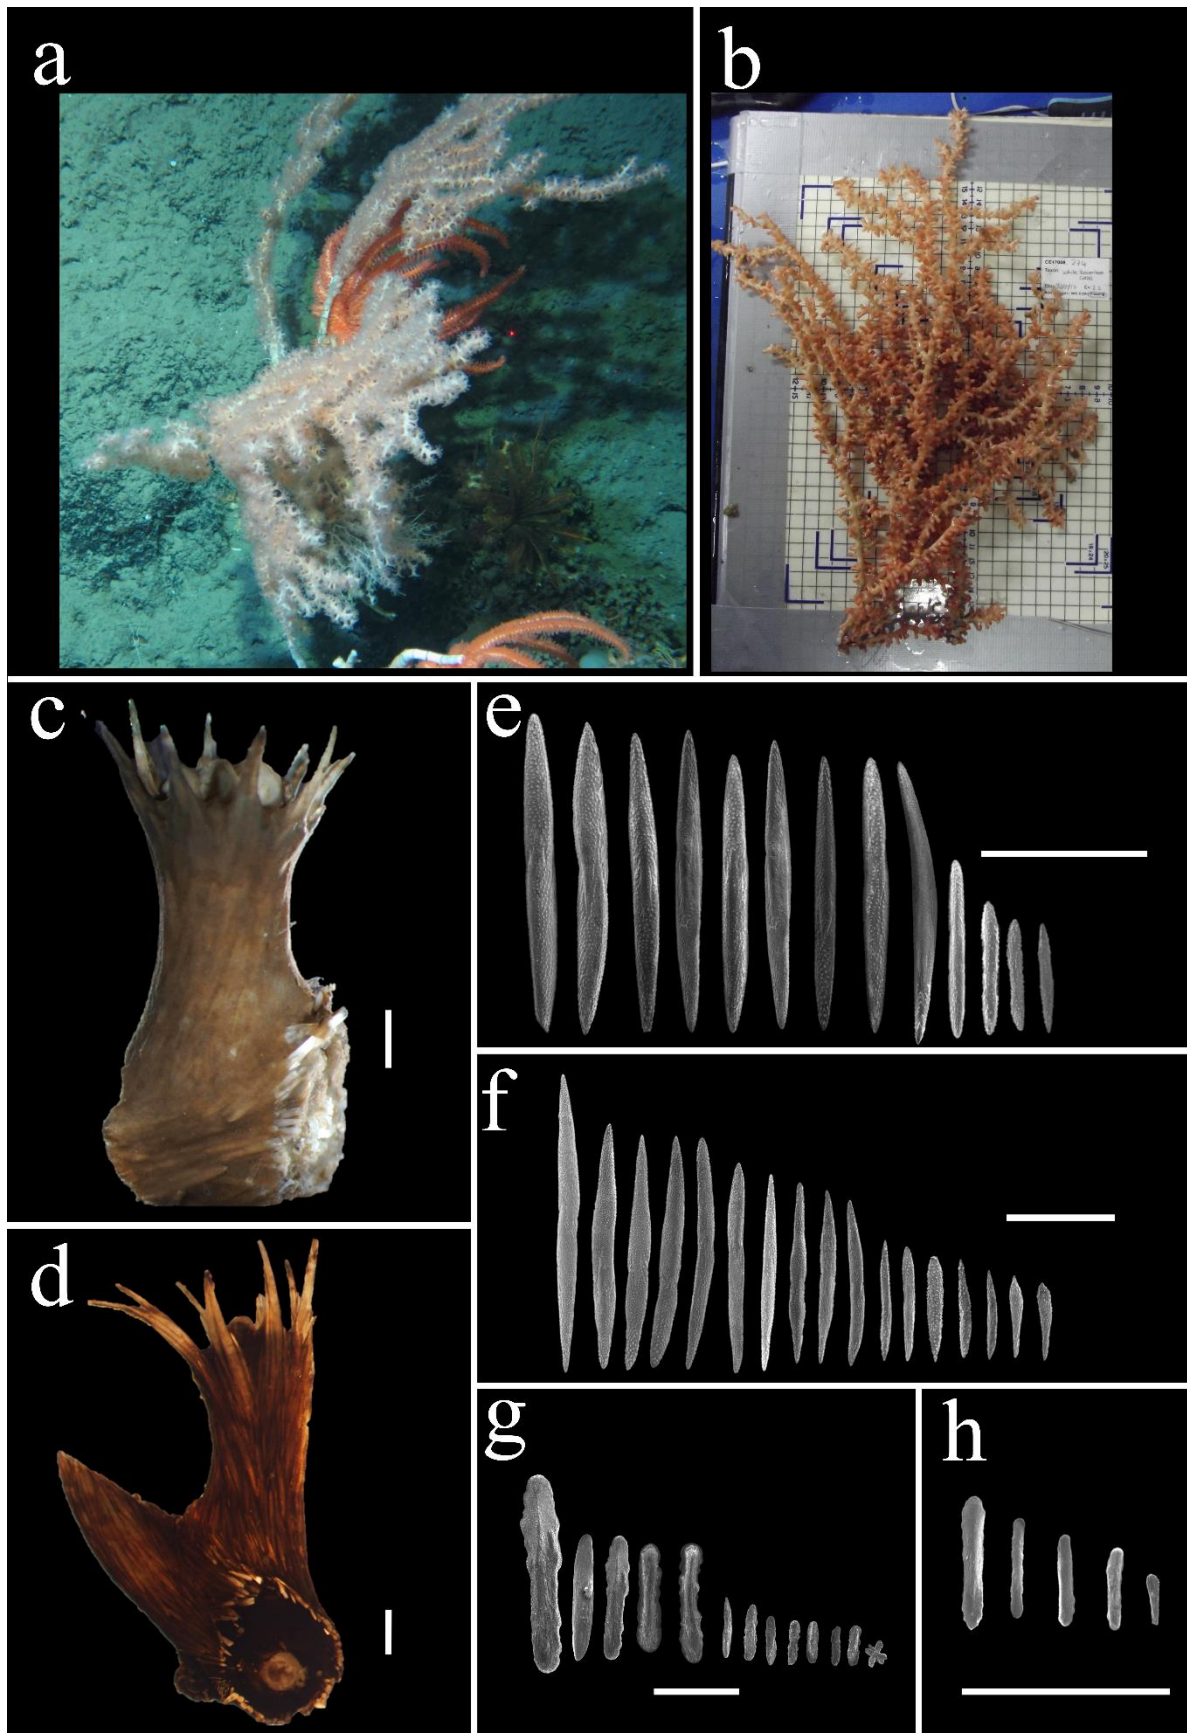

Figure S23. Morphotype 21 – Haplotype 19, voucher CE-17-274. **a**, *In-situ* image. **b**, *Ex-situ* image. **c**, Whole polyp. **d**, Whole polyp cleared in clove oil. **e**, Sclerites from the body wall. **f**, Sclerites from the coenenchyme. **g**, Sclerites from the tentacles. **h**, Sclerites from the pharynx. Scale bar: c, d, e, and f = 1 mm, g = 100  $\mu$ m, and h = 500  $\mu$ m.



## **Morphotype 22 – Haplotype 19**

### **Subclade J3**

*Vouchers:* CE-18-088, **CE-18-538**, CE-18-653

*Location:* North Porcupine Bank between 1361 – 1397 m.

*Colony and polyp morphology:* Colonies planar and branch di- and trichotomously from the nodes (Figure S24a and b), but less so than morphotype 1. Polyps are circular to trumpet in shape (Figure S24c and d). Colonies have a thin coenenchyme and polyps originate from all sides of the coenenchyme.

*Sclerites:* Clubs and rods are present in the body ( $\approx 3.1$  mm – 320  $\mu$ m, Figure S24e) arranged obliquely toward the base and between large inter-tentacular sclerites. Intertentacular sclerites present. Rods ( $\approx 1.7$  mm – 660  $\mu$ m) and flattened rods ( $\approx 490$   $\mu$ m – 170  $\mu$ m) are present in the coenenchyme (Figure S24f). Flattened rods are found in the tentacles ( $\approx 370$   $\mu$ m – 120  $\mu$ m, Figure S24g) and pharynx ( $\approx 120$   $\mu$ m, Figure S24h). Clubs are more often finely striated with granulation at the ends.

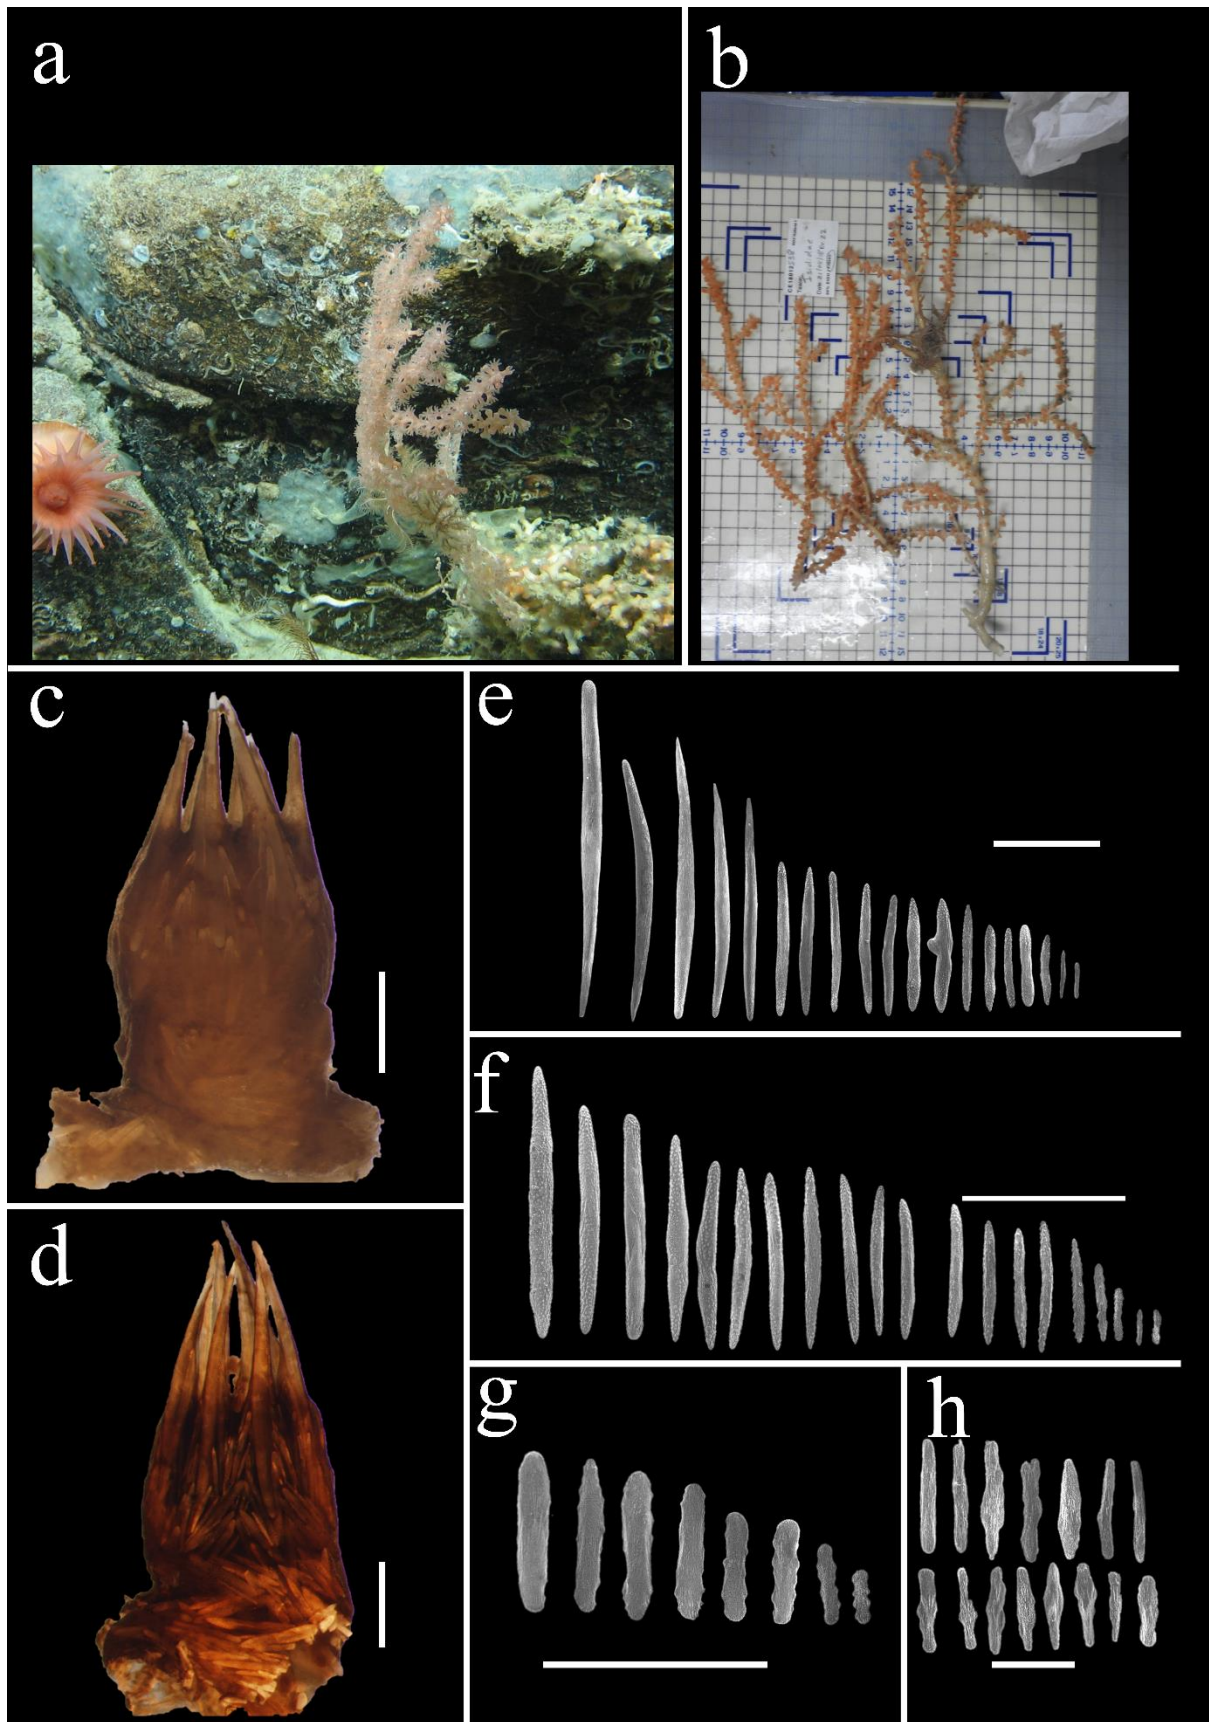

Figure S24. Morphotype 22 – Haplotype 19, voucher CE-18-538. **a**, *In-situ* image. **b**, *Ex-situ* image. **c**, Whole polyp. **d**, Whole polyp cleared in clove oil. **e**, Sclerites from the body wall. **f**, Sclerites from the coenenchyme. **g**, Sclerites from the tentacles. **h**, Sclerites from the pharynx. Scale bar: c, d, e, and f = 1 mm, g = 500  $\mu$ m, and h = 100  $\mu$ m.

## **Morphotype 23 – Haplotype 20**

### **Subclade J3**

*Vouchers:* **CE-17-367**

*Location:* Whittard Canyon at 1599 m.

*Colony and polyp morphology:* Planar colony with dichotomous branching from the nodes (Figure S25a and b). Coenenchyme is thick and cream to orange in colour with dark orange polyps. Polyps are barrel shaped (Figure S25c and d), covered in a thick tissue, and densely populate all sides of the coenenchyme. The tentacles fold over the mouth.

*Sclerites:* Needles and spindles are arranged longitudinally along the body ( $\approx 2.3$  mm – 680  $\mu$ m, Figure S25e) and coenenchyme ( $\approx 2.3$  mm – 750  $\mu$ m, Figure S25f). There are smaller scales ( $\approx 300$   $\mu$ m – 160  $\mu$ m) with lobed margins, similar to those reported in *Jasonisis thresheri* (Alderslade and McFadden 2012), present in the coenenchyme (Figure S25f). Flattened rodlets ( $\approx 360$   $\mu$ m – 90  $\mu$ m) are found in the tentacles (Figure S25g) and elongated diamond shaped rods ( $\approx 120$   $\mu$ m – 75  $\mu$ m) are found in the pharynx (Figure S25h). All body and coenenchyme sclerites were heavily granulated and/or longitudinally striated along the middle of the sclerite. Spindles are often pinched at the waist.

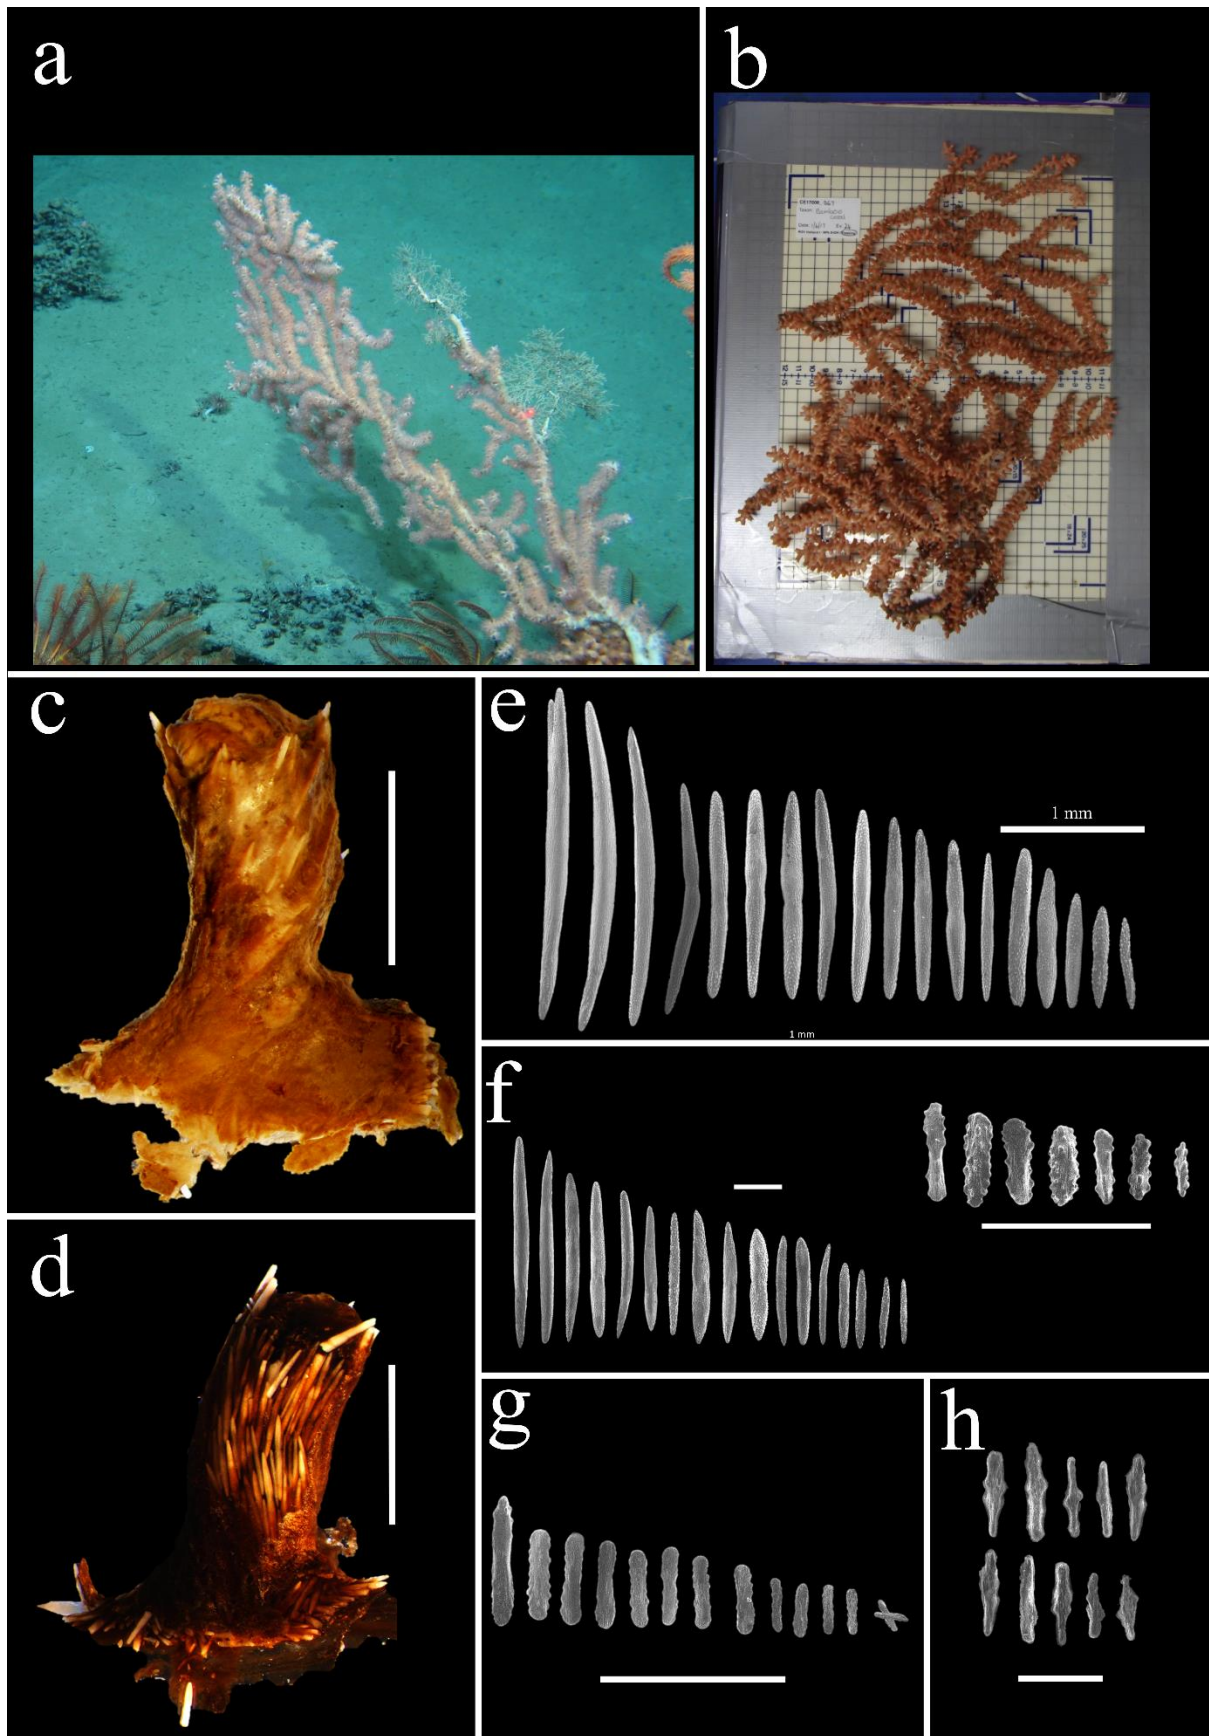

Figure S25. Morphotype 23 – Haplotype 20, voucher CE-17-367. **a**, *In-situ* image. **b**, *Ex-situ* image. **c**, Whole polyp. **d**, Whole polyp cleared in clove oil. **e**, Sclerites from the body wall. **f**, Sclerites from the coenenchyme. **g**, Sclerites from the tentacles. **h**, Sclerites from the pharynx. Scale bar: c, d, and e = 1 mm, f and g = 500  $\mu$ m, and h = 100  $\mu$ m.

## **Morphotype 24 - Haplotype 21 – *Acanella arbuscula***

### **Subclade A1**

*Vouchers:* CE-17-205, CE-17-217, CE-17-229, CE-17-248, **CE-17-304**

*Location:* Whittard Canyon between 1780 -1980 m

*Colony and polyp morphology:* Sparse di- and trichotomous branching from the nodes which forms a loose bush colony (Figure S26a and b). Coenenchyme and polyps are deep orange and the polyps are funnel shaped, tapered at the proximal end (Figure S26c and d). Tentacles fold over the mouth of the polyp. Colonies lacked a rhizoid holdfast implying attachment to hard substrate.

*Sclerites:* Slender rods ( $\approx 2.3$  mm – 300  $\mu$ m) are present in the body (Figure S26e). These rods are arranged obliquely around the polyp. Body sclerites project past the base of the tentacles between each pair of tentacles. Rods ( $\approx 1$  mm – 250  $\mu$ m) and flattened rods ( $\approx 190$   $\mu$ m – 120  $\mu$ m) with irregular margins are present in the coenenchyme (Figure S26f). Blunt ended rods ( $\approx 350$   $\mu$ m – 140  $\mu$ m) and flattened rods ( $\approx 115$   $\mu$ m) are present in the tentacles (Figure S26g). Rods ( $\approx 180$   $\mu$ m – 115  $\mu$ m) with irregular margins are present in the pharynx (Figure S26h). Sclerites from the body, coenenchyme, and tentacles are heavily granulated.



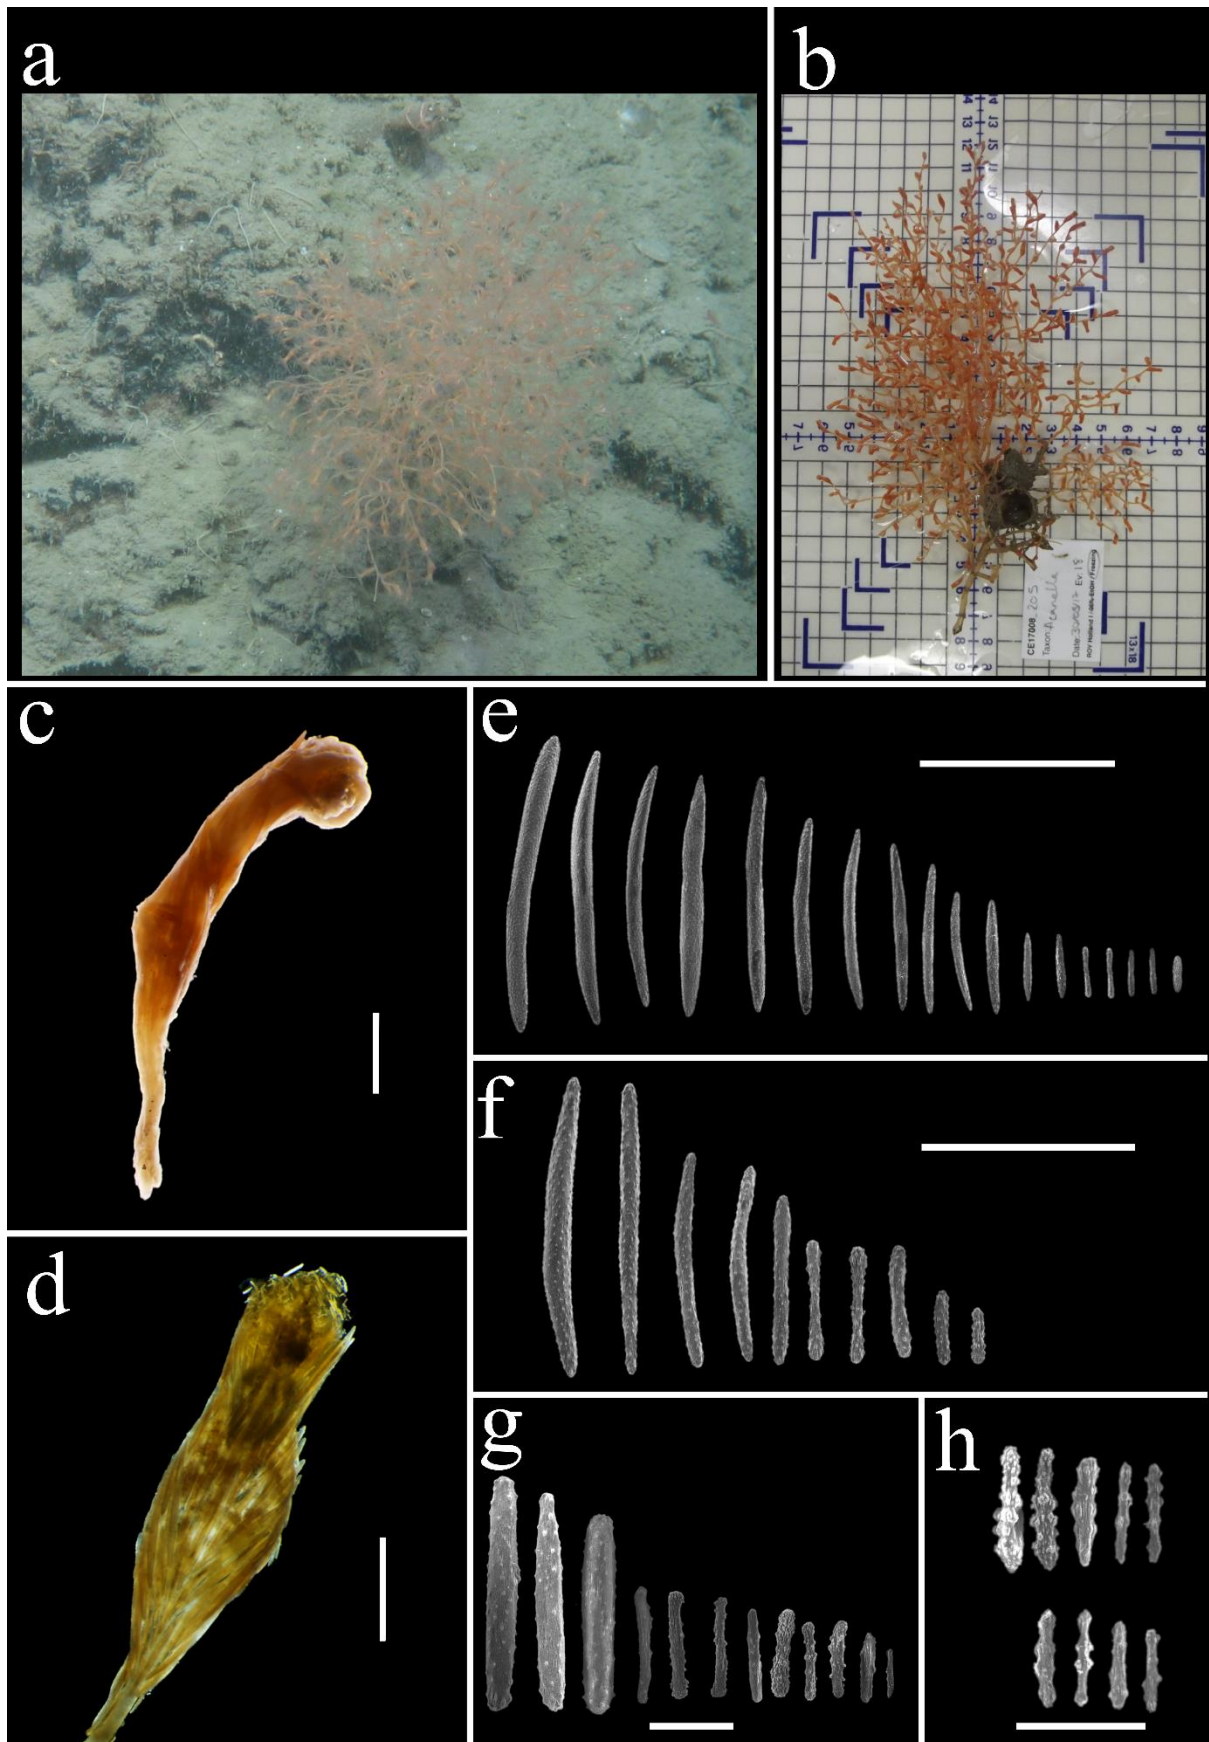

Figure S26. Morphotype 24 – Haplotype 21, voucher CE-17-304. **a**, *In-situ* image. **b**, *Ex-situ* image. **c**, Whole polyp. **d**, Whole polyp cleared in clove oil. **e**, Sclerites from the body wall. **f**, Sclerites from the coenenchyme. **g**, Sclerites from the tentacles. **h**, Sclerites from the pharynx. Scale bar: c, d, and e = 1 mm, f = 500  $\mu$ m, g and h = 100  $\mu$ m.



## **Morphotype 25 – Haplotype 21 – *Acanella arbuscula***

### **Subclade A1**

*Vouchers:* **CE-17-357**

*Location:* Whittard Canyon at 1589 m.

*Colony and polyp morphology:* Gross morphology is an intermediate between Morphotype 24 and Morphotype 26: a robust tight bush shaped colony (Figure S27a and b). Polyps are elongated and the same width from proximal to distal ends. The tentacles are gathered over the mouth (Figure S27c and d)

*Sclerites:* Needles and irregular rods of varying thickness are found in the body ( $\approx 2.9$  mm – 370  $\mu$ m, Figure S27e). Body sclerites are arranged obliquely around the polyp. Rods are present in the coenenchyme ( $\approx 650$   $\mu$ m – 390  $\mu$ m, Figure S27f). Blunt ended rods ( $\approx 320$   $\mu$ m – 220  $\mu$ m) and flattened rods ( $\approx 140$   $\mu$ m – 90  $\mu$ m) with irregular margins are present in the tentacles (Figure S27g). Rods and needles from the body, coenenchyme, and tentacles are lightly granulated. A single rod ( $\approx 120$   $\mu$ m). was extracted from the pharynx (Figure S27h).

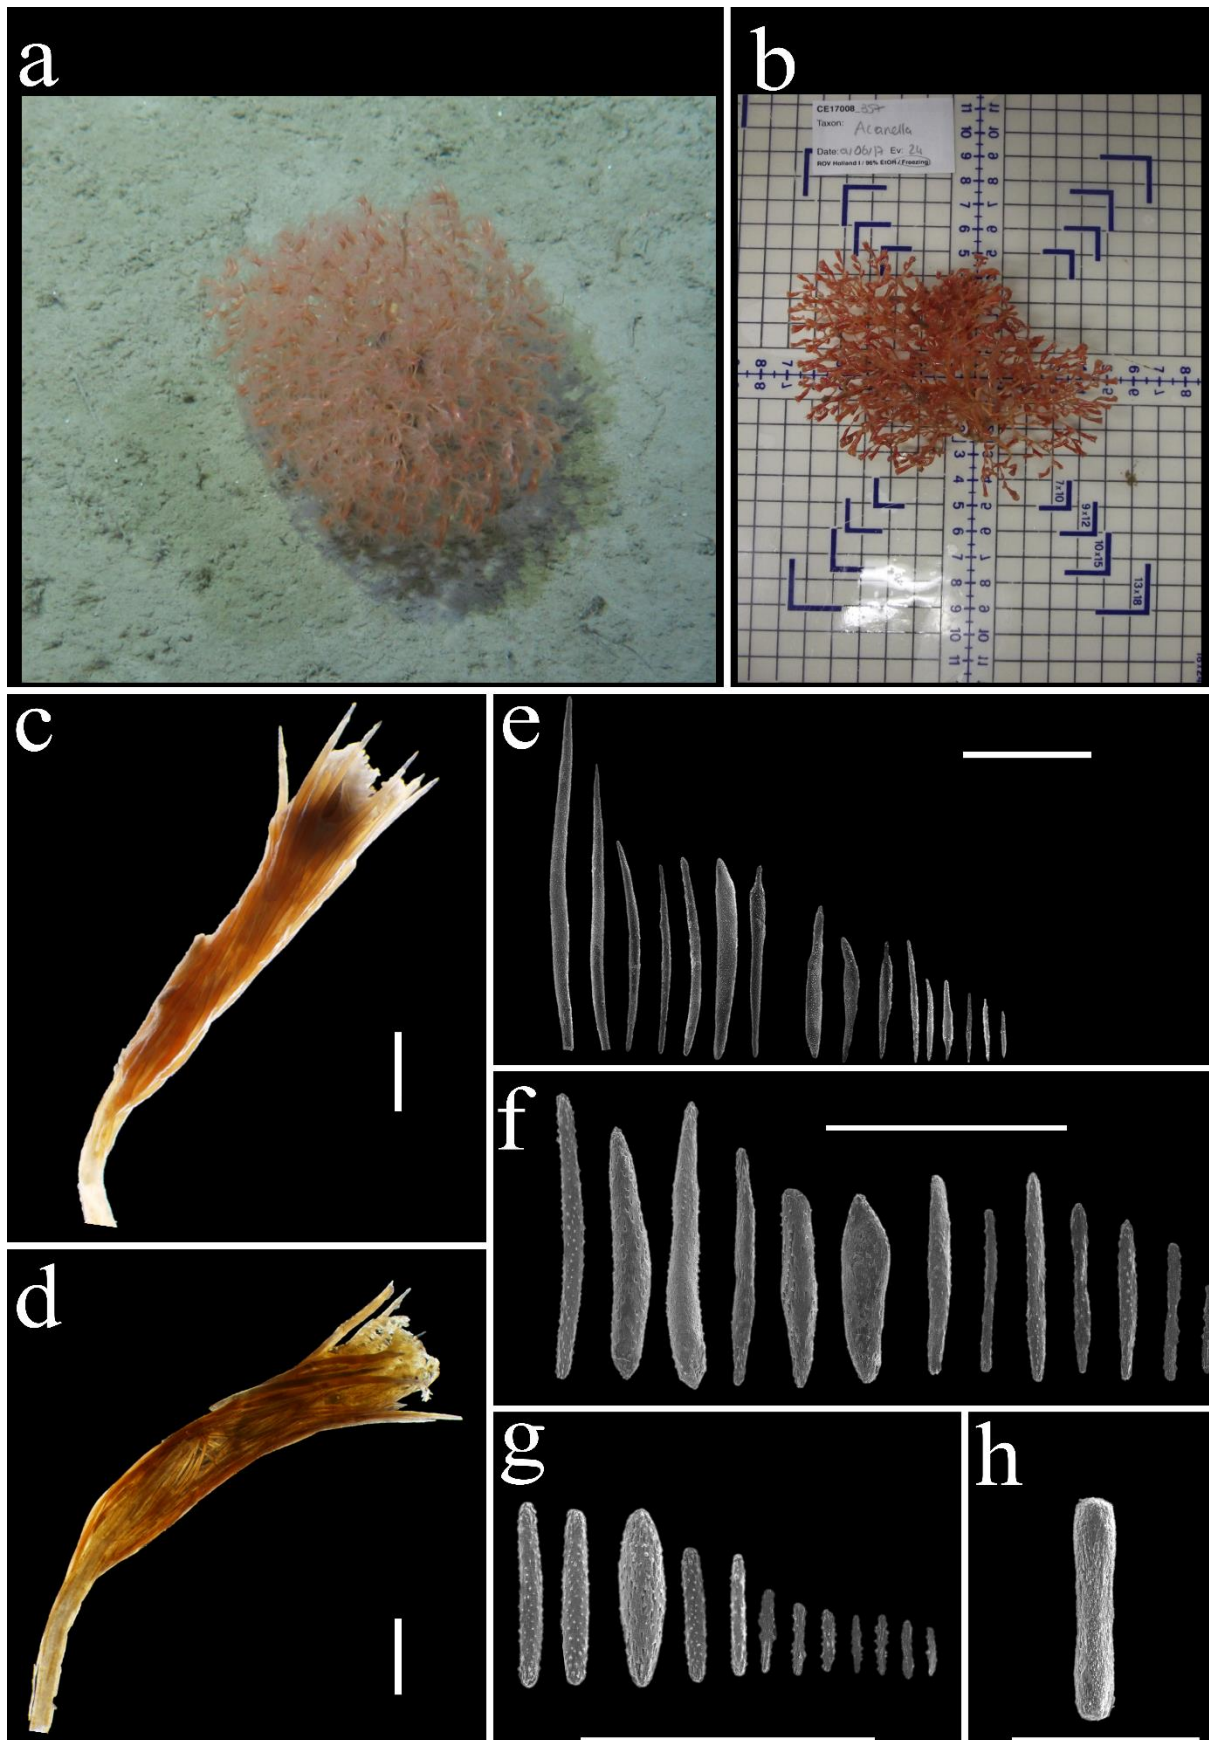

Figure S27. Morphotype 25 – Haplotype 21, voucher CE-17-357. **a**, *In-situ* image. **b**, *Ex-situ* image. **c**, Whole polyp. **d**, Whole polyp cleared in clove oil. **e**, Sclerites from the body wall. **f**, Sclerites from the coenenchyme. **g**, Sclerites from the tentacles. **h**, Sclerites from the pharynx. Scale bar: c, d, and e = 1 mm, f and g = 500 µm, and h = 100 µm.

## **Morphotype 26 – Haplotype 21 – *Acanella arbuscula***

### **Subclade A1**

*Vouchers:* **CE-17-425**, CE-17-449, CE-18-247

*Location:* Whittard Canyon and North Porcupine Bank between 1287 – 1294 m

*Colony and polyp morphology:* Di- and trichotomous branching from the nodes at an acute angle forming a funnel bush shape (Figure S28a and b). Coenenchyme and polyps are orange. Coenenchyme more transparent at proximal portion of colony, thickening distally to an orange or yellow colour. Attached to hard substrates. Polyps are barrel shaped and densely populate the coenenchyme (Figure S28c and d).

*Sclerites:* Slender rods found in the body wall ( $\approx 2.2$  mm – 280  $\mu$ m, Figure S28e) and coenenchyme ( $\approx 1$  mm, Figure S28f). Body sclerites arranged obliquely around the polyp. Intertentacular sclerites present. Blunt ended rods ( $\approx 275$   $\mu$ m – 160  $\mu$ m) and flattened scales ( $\approx 100$   $\mu$ m) with irregular margins are present in the tentacles (Figure S28g). All sclerites from the body wall, tentacles, and coenenchyme are heavily granulated. Warty rods are found in the pharynx (Figure S28h).

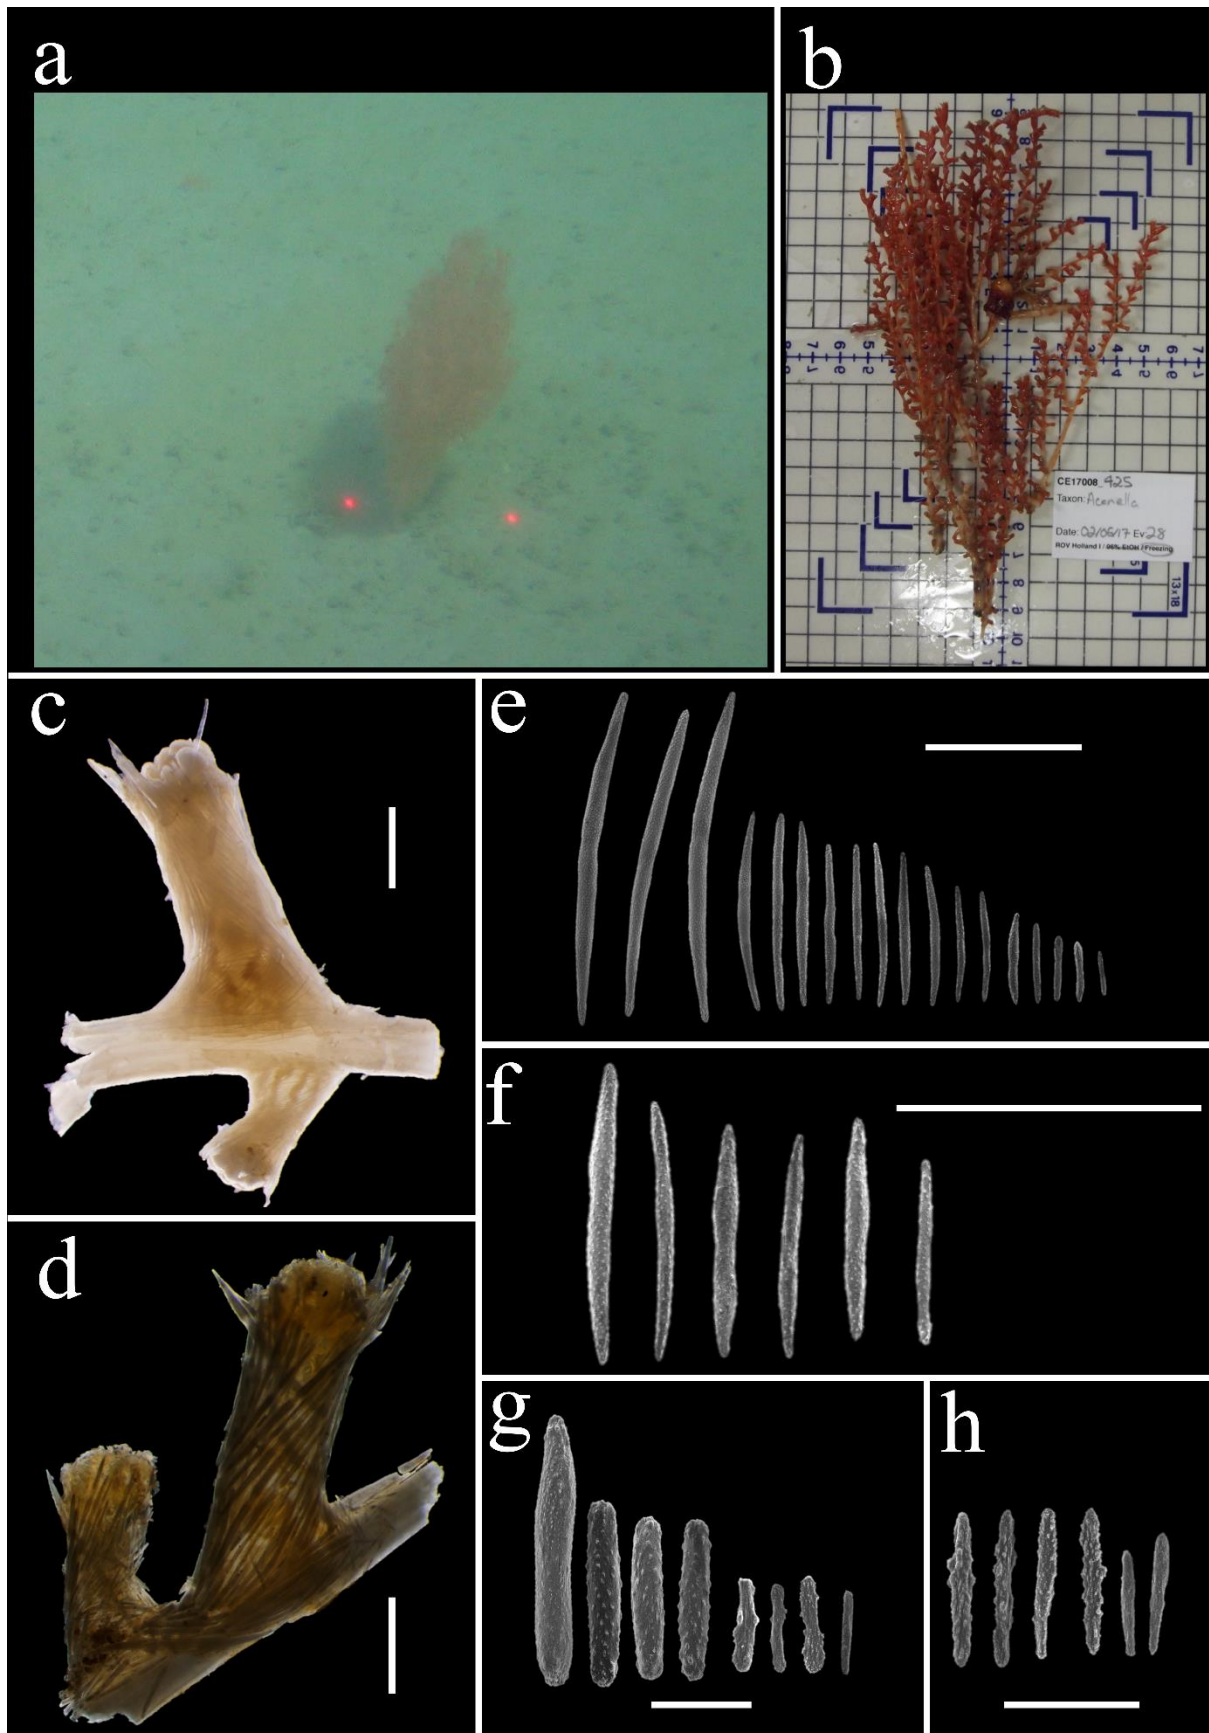

Figure S28. Morphotype 26 – Haplotype 21, voucher CE-17-425. **a**, *In-situ* image. **b**, *Ex-situ* image. **c**, Whole polyp. **d**, Whole polyp cleared in clove oil. **e**, Sclerites from the body wall. **f**, Sclerites from the coenenchyme. **g**, Sclerites from the tentacles. **h**, Sclerites from the pharynx. Scale bar: c, d, e and f = 1 mm, g and h = 100 µm.

**Morphotype 27 – Haplotype 22 – *Acanella* sp.**

**Clade A1**

*Vouchers:* **CE-18-339**

*Location:* North Porcupine Bank at 821 m.

*Colony and polyp morphology:* Dichotomous branching from the node occurring in a single plane leading to a flabellate colony (Figure S29a and b). Coenenchyme is thin near the base of colony and thickens distally with an orange colour. Polyps are barrel shaped, and tentacles are contracted over the mouth (Figure S29c and d). Individual attached to hard substrate.

*Sclerites:* Rods and needles, heavily granulated, present in the polyp body ( $\approx 2.3$  mm - 180  $\mu$ m, Figure S29e) and coenenchyme ( $\approx 1$  mm – 115  $\mu$ m, Figure S29f). Body sclerites are arranged obliquely around the polyp. Intertentacular needles present. Blunt ended rods ( $\approx 400$   $\mu$ m – 75  $\mu$ m), are present in the tentacles (Figure S29g) all lightly granulated. Warty rods ( $\approx 140$   $\mu$ m- 70  $\mu$ m) are present in the pharynx (Figure S29h).



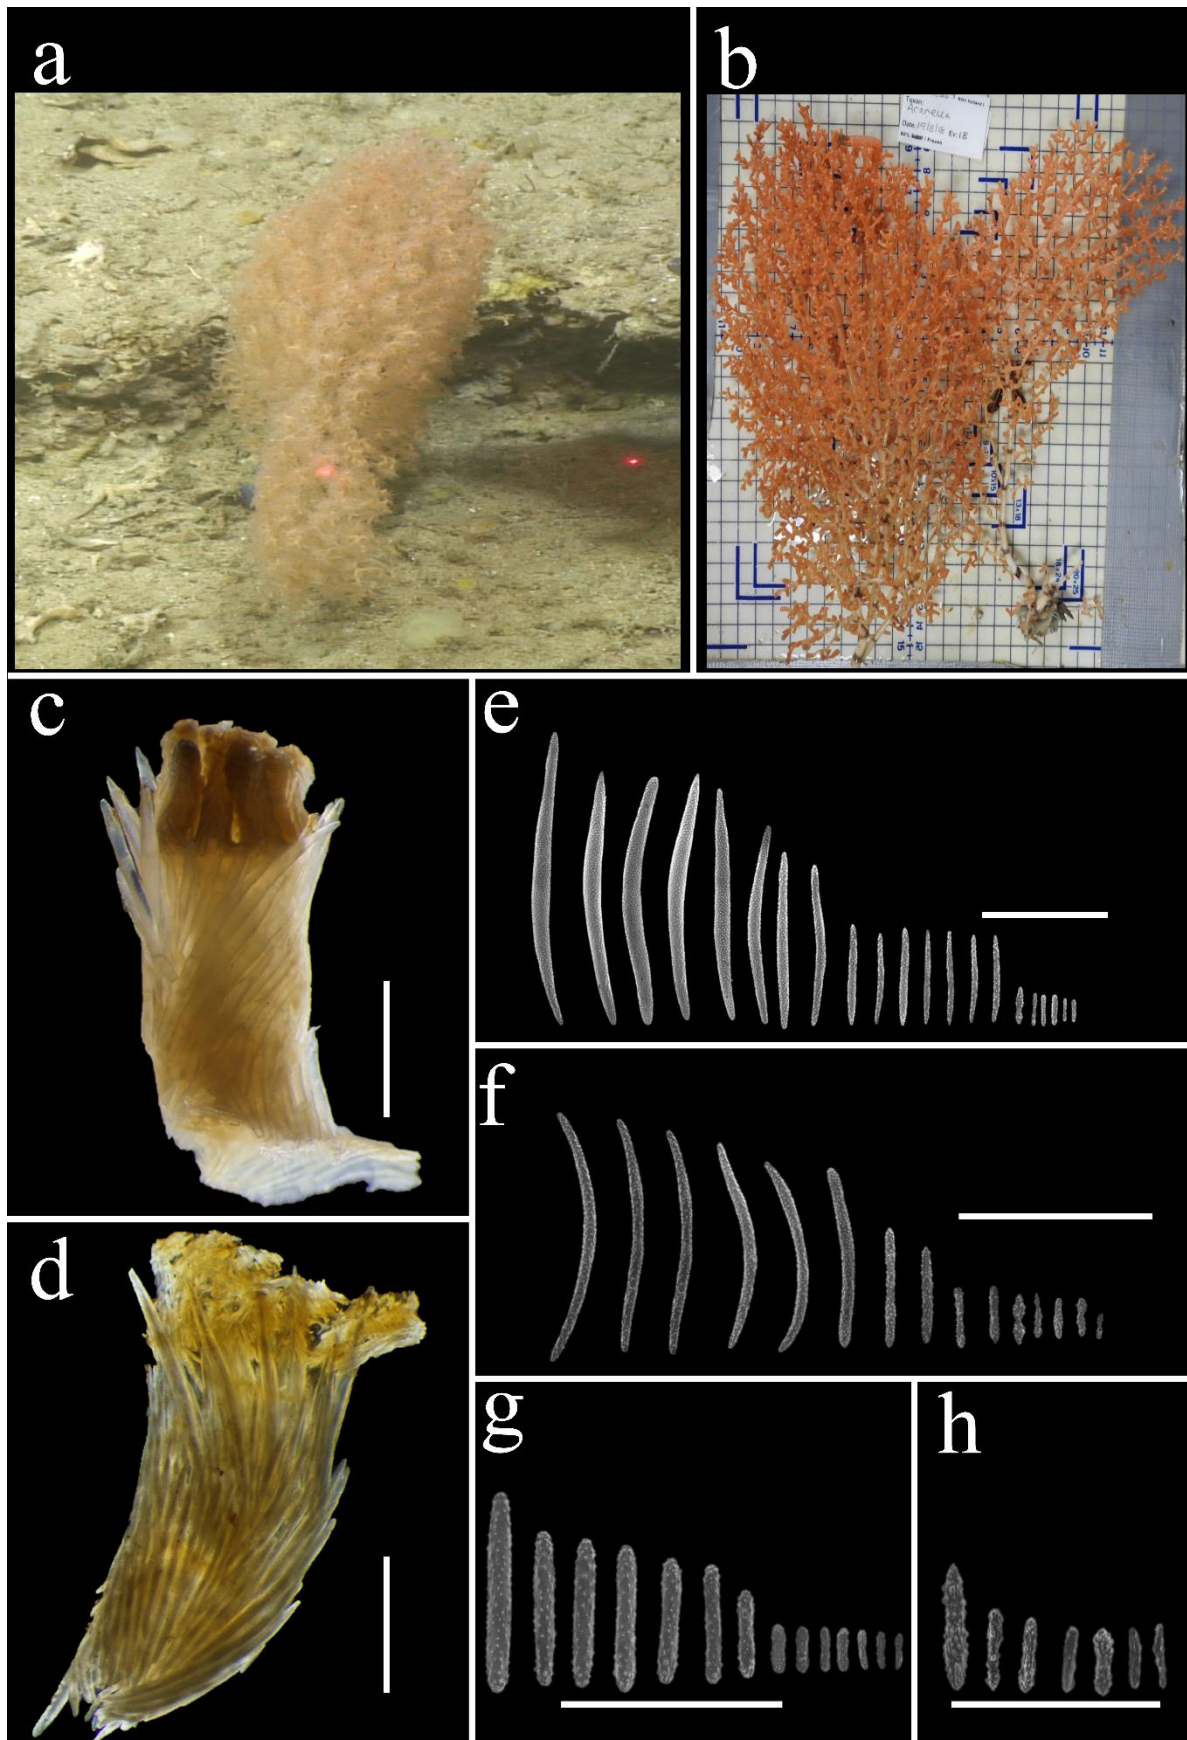

Figure S29. Morphotype 27 – Haplotype 22, voucher CE-18-339. **a**, *In-situ* image. **b**, *Ex-situ* image. **c**, Whole polyp. **d**, Whole polyp cleared in clove oil. **e**, Sclerites from the body wall. **f**, Sclerites from the coenenchyme. **g**, Sclerites from the tentacles. **h**, Sclerites from the pharynx. Scale bar: c, d, e, and f = 1 mm, g = 500  $\mu$ m, and h = 250  $\mu$ m.



## **Morphotype 28 – Haplotype 16**

### **Subclade C1**

*Vouchers:* CE-17-233, **CE-17-287**, CE-18-143,

*Location:* Whittard Canyon and North Porcupine Bank between 1745 – 1845 m.

*Colony and polyp morphology:* Unbranched whip coral (Figure S30a and b). Coenenchyme is cream in colour with pink polyps that originate on all sides of the coenenchyme. A thick tissue covers the polyps, which are barrel shaped (Figure S30c and d). Tentacles are loosely gathered over the mouth.

*Sclerites:* Needles ( $\approx 5.4$  mm – 290  $\mu$ m) are present in the body (Figure S30e), concentrated longitudinally on one side of the polyp with some needles projecting past the base of the tentacles. No sclerites are found in the coenenchyme. Flattened rods ( $\approx 300$   $\mu$ m – 80  $\mu$ m) are found in the tentacles (Figure S30g). The pharyngeal sclerites were elongated diamond shaped rods ( $\approx 130$   $\mu$ m, Figure S30h).

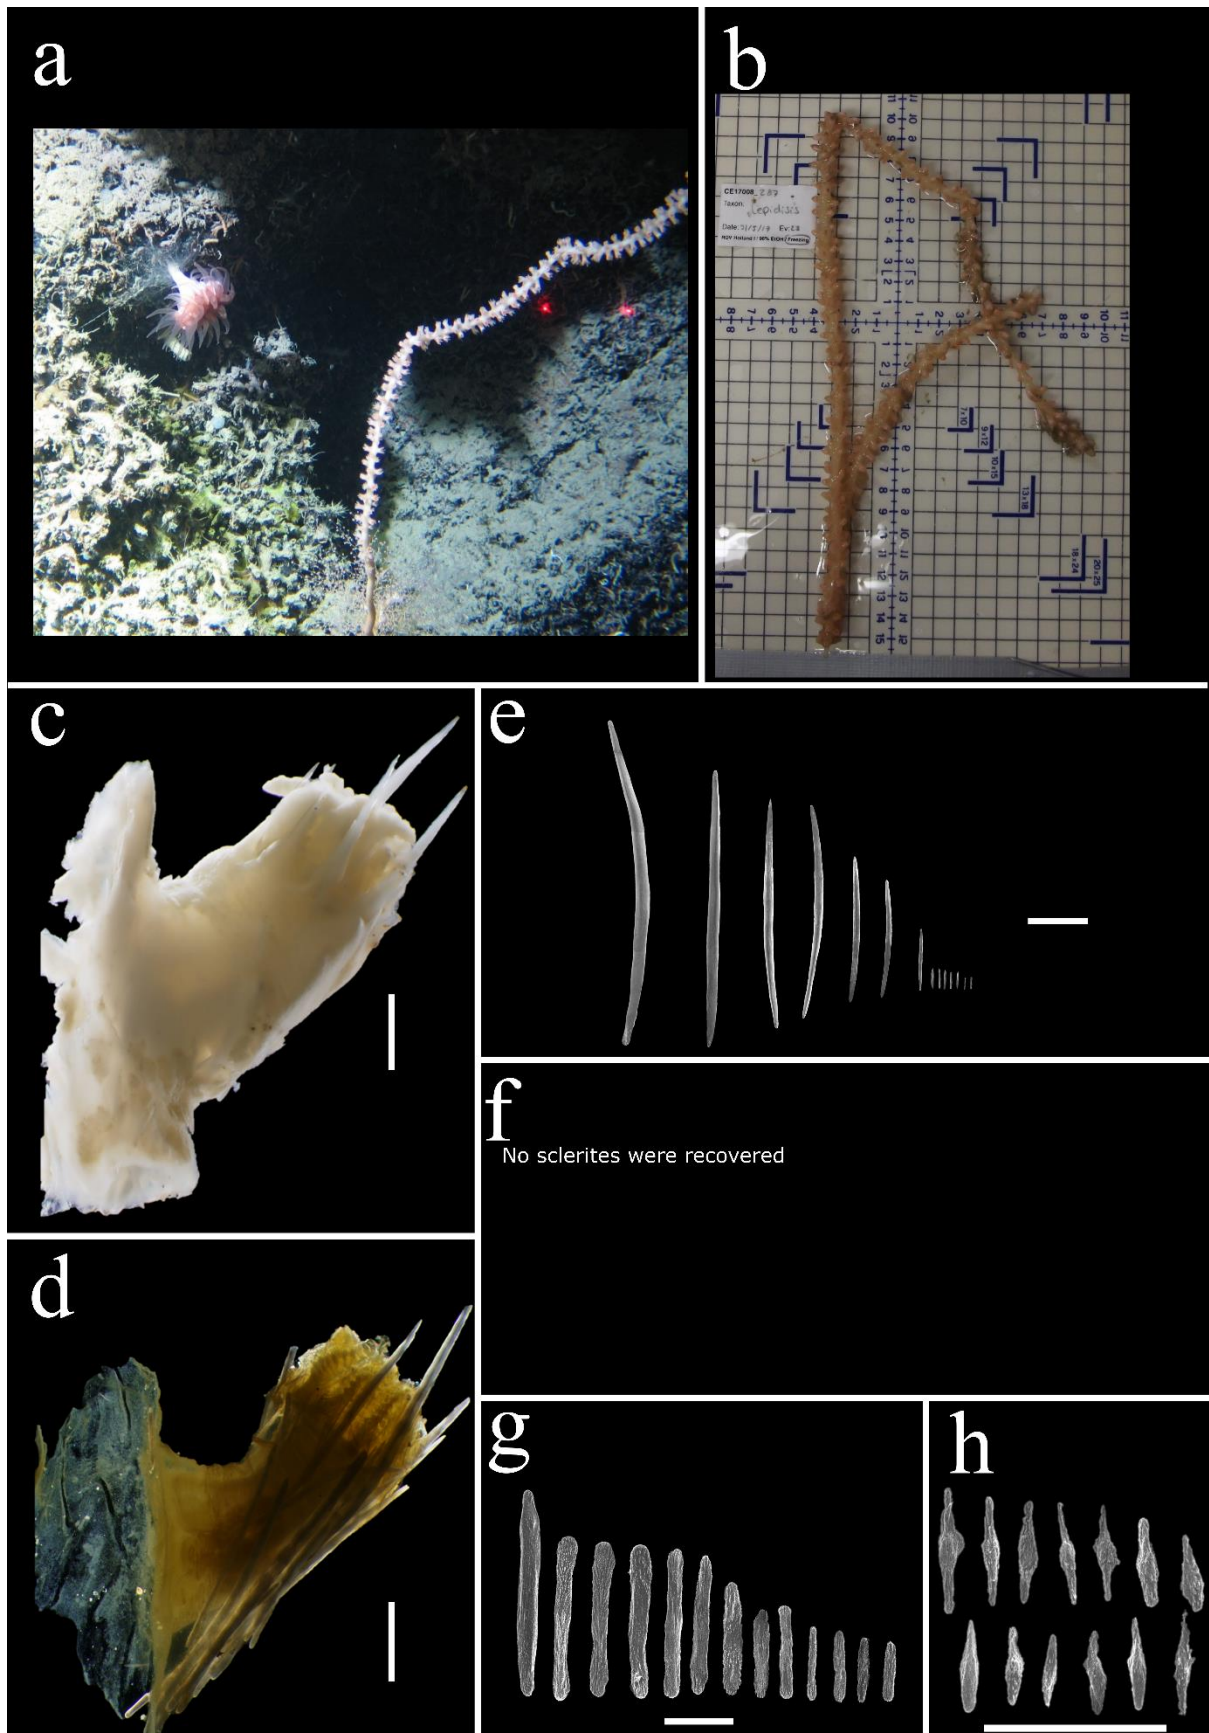

Figure S30. Morphotype 28 – Haplotype 16, voucher CE-17-287. **a**, *In-situ* image. **b**, *Ex-situ* image. **c**, Whole polyp. **d**, Whole polyp cleared in clove oil. **e**, Sclerites from the body wall. **f**, Sclerites from the coenenchyme. **g**, Sclerites from the tentacles. **h**, Sclerites from the pharynx. Scale bar: c, d, and e = 1 mm, g = 100  $\mu$ m, and h = 200  $\mu$ m.

## **Morphotype 29 – Haplotype 16**

### **Subclade C1**

**Vouchers:** CE-18-242, CE-18-456

*Location:* North Porcupine Bank between 1292 – 1532 m.

*Colony and polyp morphology:* Unbranched whip coral that infrequently coils distally (Figure S30a and b). Coenenchyme is thick and densely populated with irregularly placed polyps. Coenenchyme is cream-orange in colour transitioning to orange-pink polyps. Polyps are the same width from proximal to distal ends (Figure S30c and d) and are covered with a thick tissue. Tentacles relaxed over the mouth.

*Sclerites:* Smooth needles ( $\approx 4\text{ mm} - 200\text{ }\mu\text{m}$ ) sparsely populate body wall (Figure S30e) arranged obliquely and longitudinally along the polyp. Smooth needles ( $\approx 2\text{ mm} - 730\text{ }\mu\text{m}$ ) and elongate diamond rodlets ( $\approx 300\text{ }\mu\text{m}$ ) are present in the coenenchyme (Figure S30f). Flattened rods ( $\approx 230\text{ }\mu\text{m}$ ) are present in the tentacles (Figure S30g) and elongated diamond shaped rods ( $\approx 140\text{ }\mu\text{m}$ ) in the pharynx (Figure S30h).

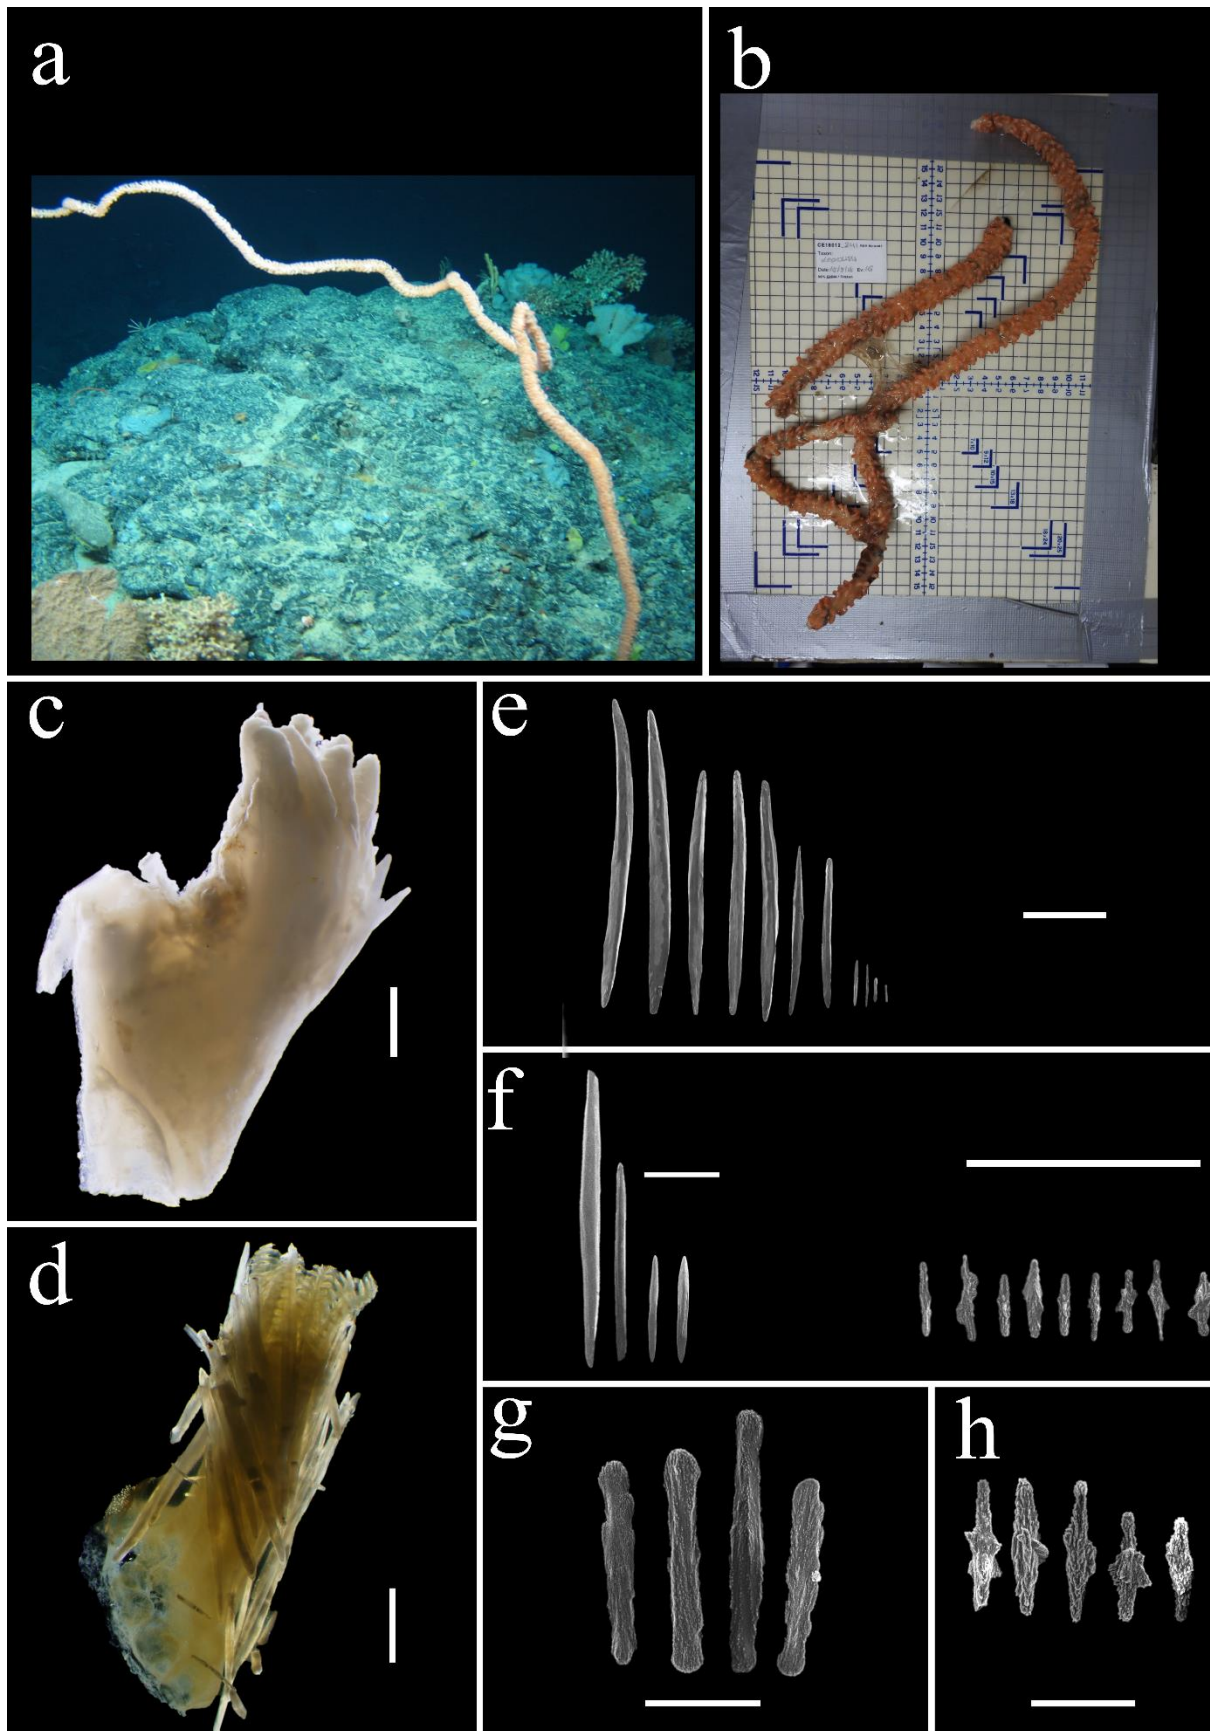

Figure S31. Morphotype 29 – Haplotype 16, voucher CE-18-242. **a**, *In-situ* image. **b**, *Ex-situ* image. **c**, Whole polyp. **d**, Whole polyp cleared in clove oil. **e**, Sclerites from the body wall. **f**, Sclerites from the coenenchyme. **g**, Sclerites from the tentacles. **h**, Sclerites from the pharynx. Scale bar: c, d, and e = 1 mm, f = 500  $\mu$ m, g and h = 100  $\mu$ m.

## **Morphotype 30 – Haplotype 17**

### **Subclade C1**

*Vouchers:* **CE-17-356**

*Location:* Whittard Canyon at 1591 m.

*Colony and polyp morphology:* Unbranched whip coral (Figure S32a and b) attached to scleractinian rubble with a circular disk. The coenenchyme is thick and cream in colour which transitions to pink polyps. Polyps originate on all sides of the axis. Polyps are barrel shaped with thick tissue (Figure S32c and d). The tentacles are relaxed and fold over the mouth.

*Sclerites:* Smooth needles ( $\approx 5\text{ mm} - 180\text{ }\mu\text{m}$ ) sparsely populate the body wall (Figure S32e) and are arranged obliquely along the polyp, more concentrated towards the distal end. Needles project past the base of the tentacles. Needles ( $\approx 700\text{ }\mu\text{m}$ ) and flattened rods ( $\approx 250\text{ }\mu\text{m} - 100\text{ }\mu\text{m}$ ) are found in the coenenchyme (Figure S32f). Flattened rods ( $\approx 300\text{ }\mu\text{m} - 100\text{ }\mu\text{m}$ ) are found in the tentacles (Figure S32g) and elongated diamond shaped rods ( $\approx 80\text{ }\mu\text{m} - 130\text{ }\mu\text{m}$ ) are present in the pharynx (Figure S32h).



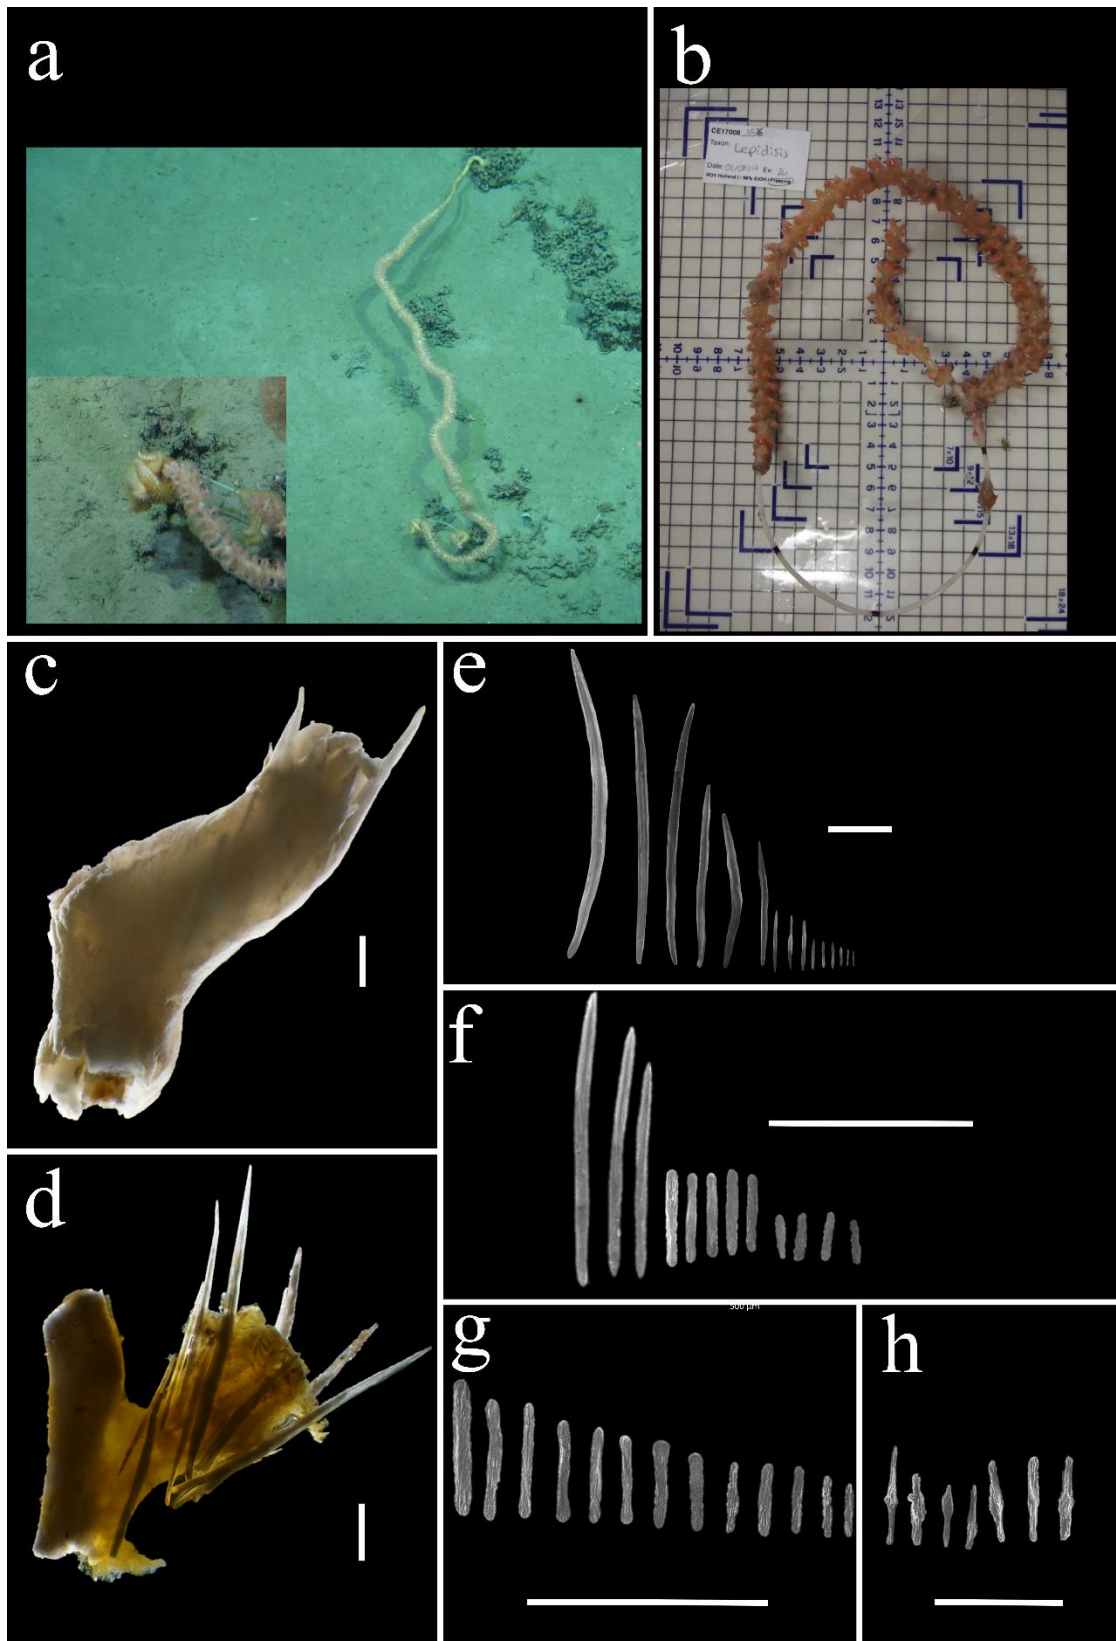

Figure S32. Morphotype 30 – Haplotype 17, voucher CE-17-356. **a**, *In-situ* image. **b**, *Ex-situ* image. **c**, Whole polyp. **d**, Whole polyp cleared in clove oil. **e**, Sclerites from the body wall. **f**, Sclerites from the coenenchyme. **g**, Sclerites from the tentacles. **h**, Sclerites from the pharynx. Scale bar: c, d, and e = 1 mm, f and g = 500  $\mu$ m, and h = 200  $\mu$ m.



## **2. Family Primnoidae**

Nine haplotypes and six morphotypes.

**Morphotype 31 – Haplotype 33 – *Primnoa* sp.**

*Vouchers:* CE-17-081, **CE-17-095**

*Location:* Whittard Canyon between 1482 and 1490 m.

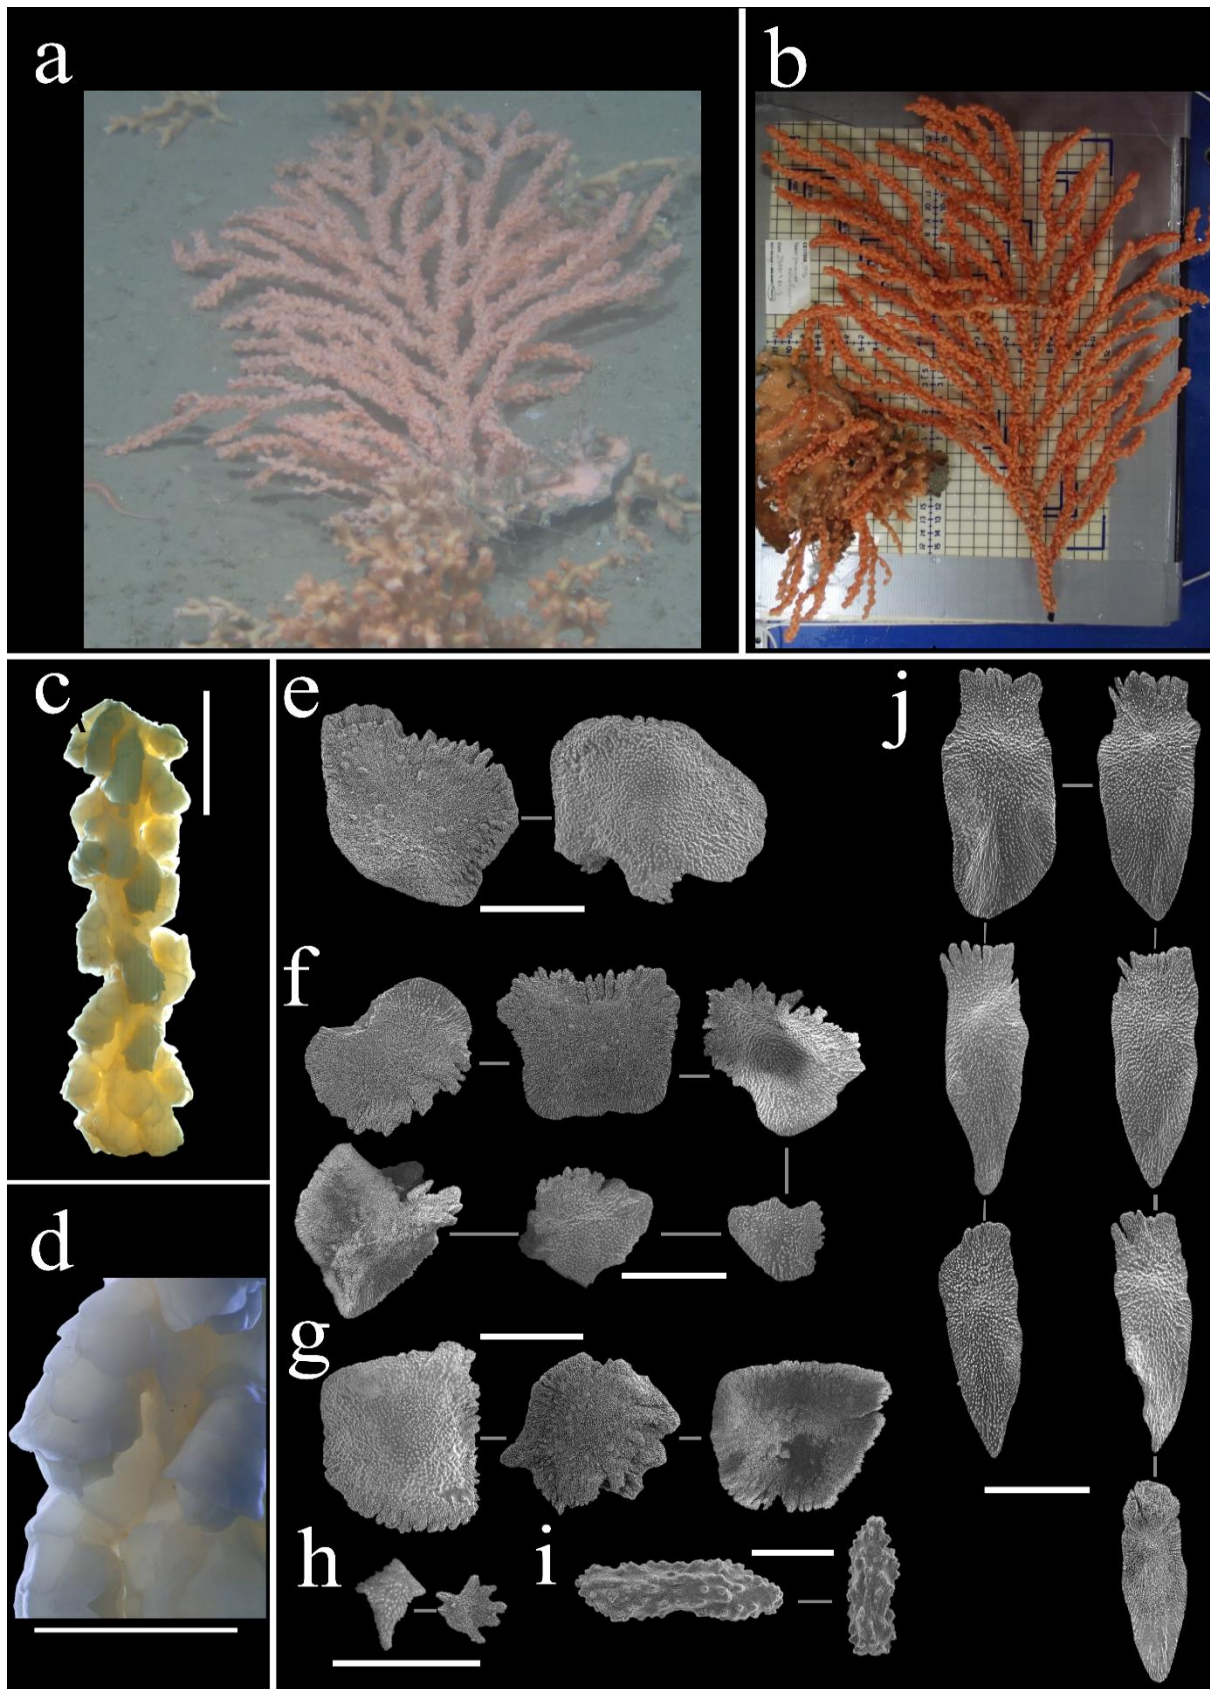

Figure S33. Morphotype 31 – Haplotype 33, *Primnoa* sp., voucher CE-17-095. **a**, *In-situ* image. **b**, *Ex-situ* image. **c**, Close up of the colony. **d**, Close up of polyps **e**, Basal scales. **f**, Marginal scales. **g**, Medial scales. **h**, Sclerites from the coenenchyme. **i**, Sclerites from the tentacles. **j**, Opercular scales. Scale bar: c = 10 mm, d = 5 mm, e, f, g, h and j = 1 mm, i = 100  $\mu$ m.

**Morphotype 31 – Haplotype 34 – *Primnoa* sp**

*Vouchers:* **CE-17-160**

*Location:* Whittard Canyon at 1514 m.

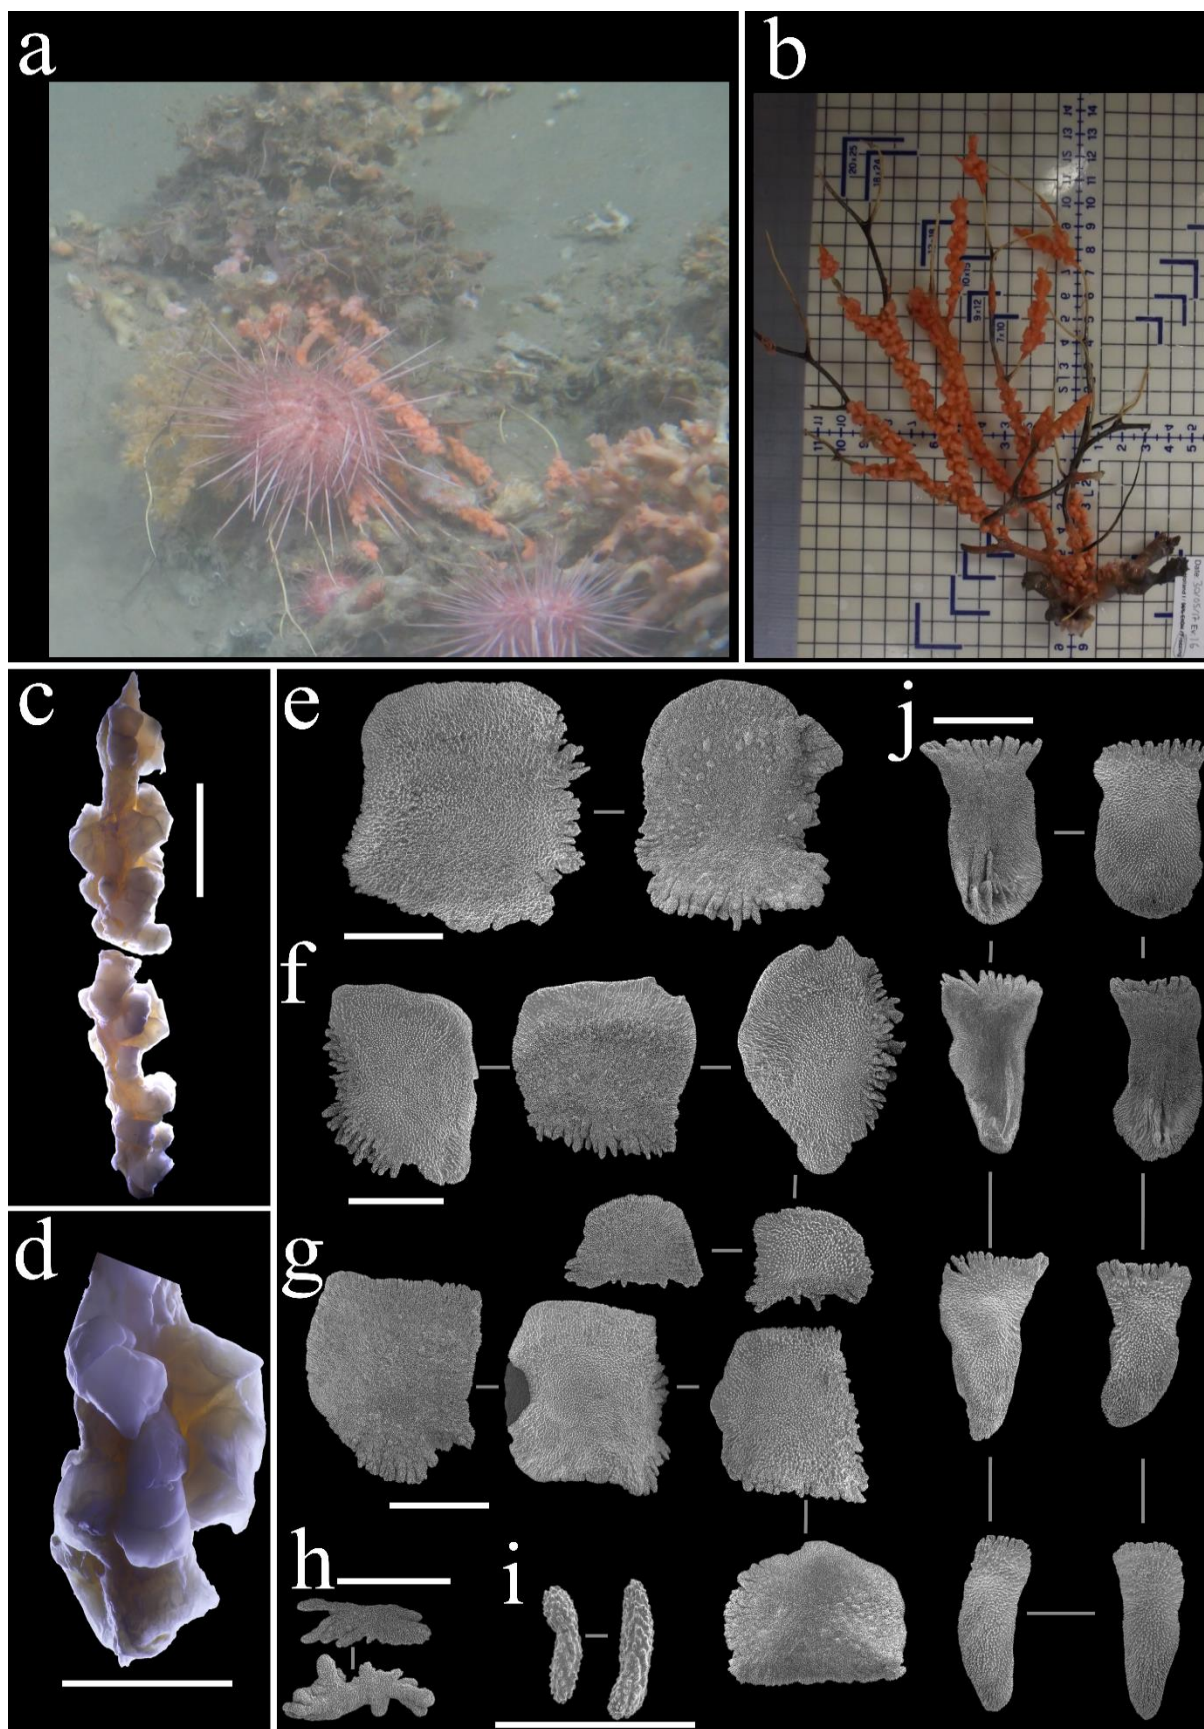

Figure S34. Morphotype 31 – Haplotype 34, *Primnoa* sp. voucher CE-17-160. **a**, *In-situ* image. **b**, *Ex-situ* image. **c**, Close up of the colony. **d**, Close up of polyps. **e**, Basal scales. **f**, Marginal scales. **g**, Medial scales. **h**, Sclerites from the coenenchyme. **i**, Sclerites from the tentacles. **j**, Opercular scales. Scale bar: c = 10 mm, d = 5 mm, e, f, g, h, and j = 1 mm, i = 500  $\mu$ m.

**Morphotype 31 – Haplotype 35 – *Primnoa* sp**

*Vouchers:* **CE-17-082**, CE-17-169

*Location:* Whittard Canyon between 1490 and 1508 m.



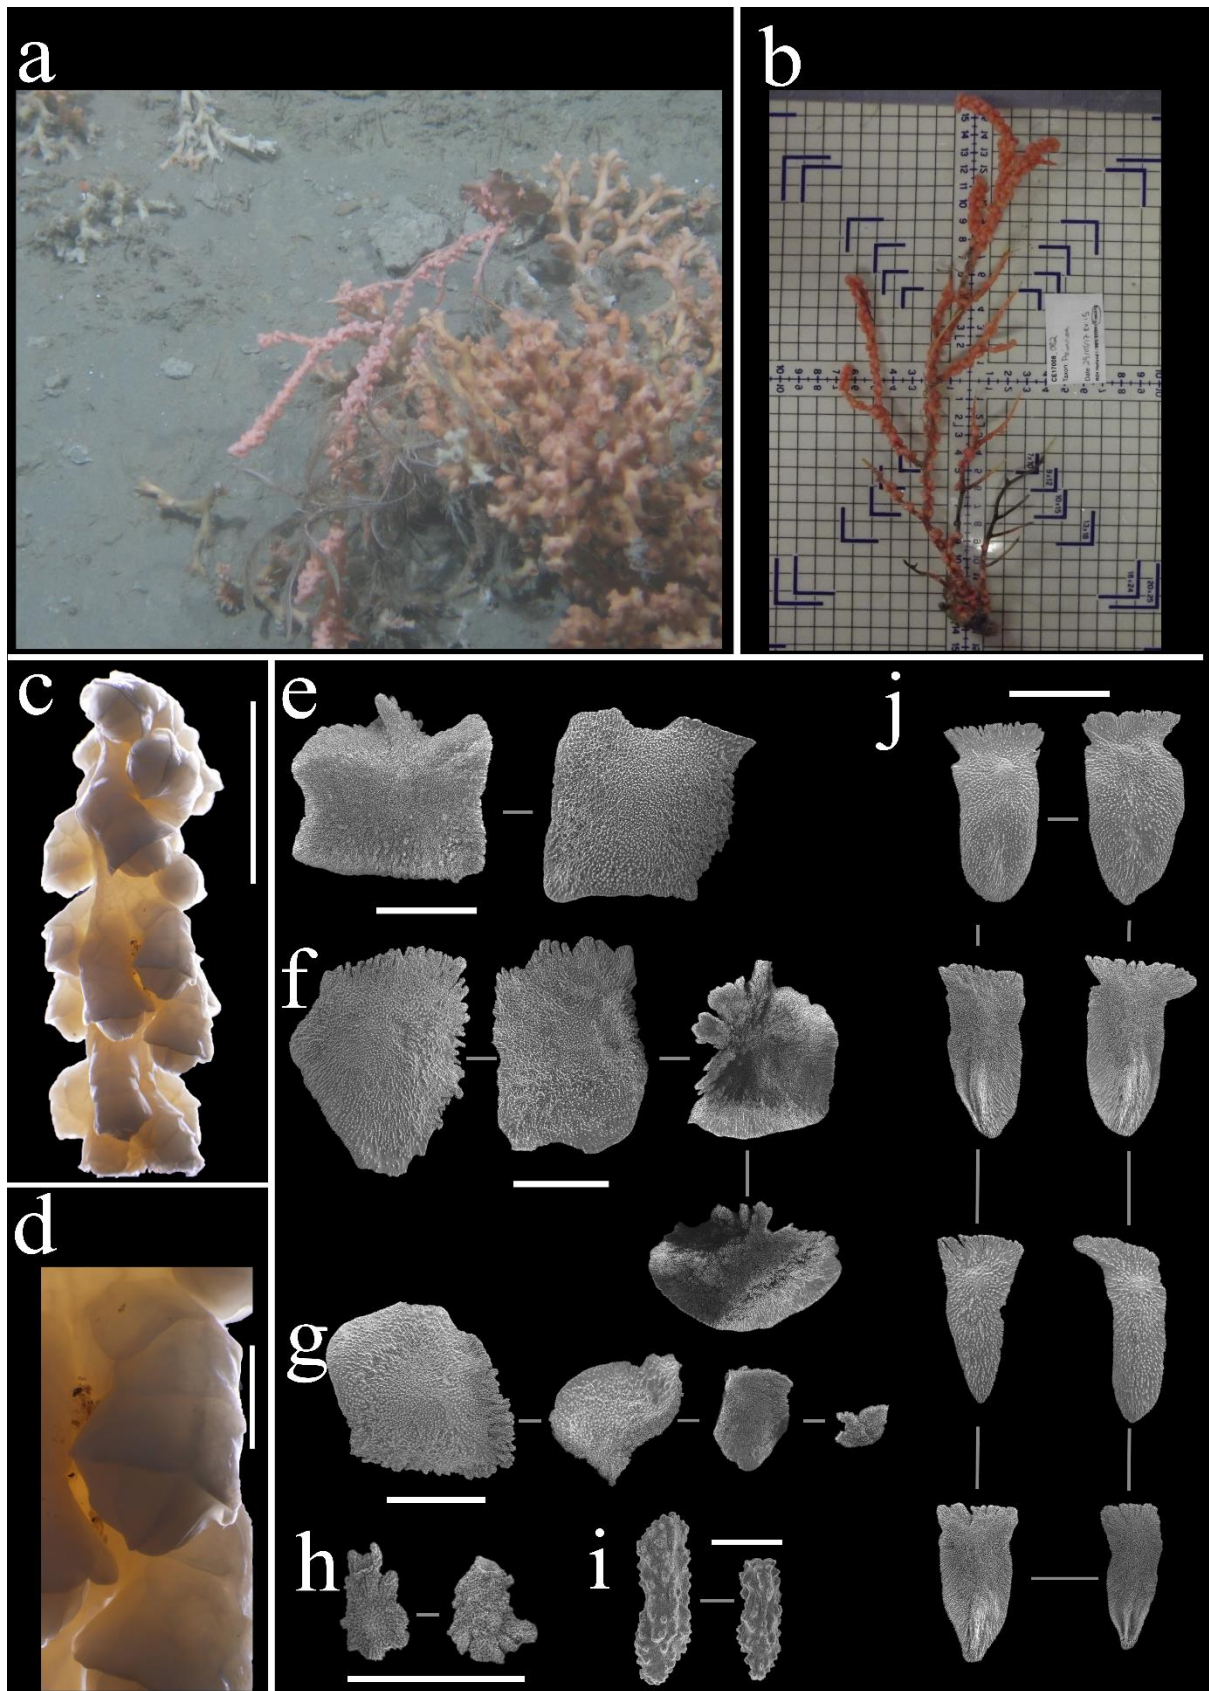

Figure S35. Morphotype 31 – Haplotype 35, *Primnoa* sp. voucher CE-17-082. **a**, *In-situ* image. **b**, *Ex-situ* image. **c**, Close up of the colony. **d**, Close up of polyps. **e**, Basal scales. **f**, Marginal scales. **g**, Medial scales. **h**, Sclerites from the coenenchyme. **i**, Sclerites from the tentacles. **j**, Opercular scales. Scale bar: c = 10 mm, d = 5 mm, e, f, g, and j = 1 mm, h = 500  $\mu$ m, i = 100  $\mu$ m.



**Morphotype 31 – Haplotype 36 – *Primnoa* sp**

*Vouchers:* CE-17-084, CE-17-090. **CE-17-101.** CE-17-102

*Location:* Whittard Canyon between 1489 and 1493 m.

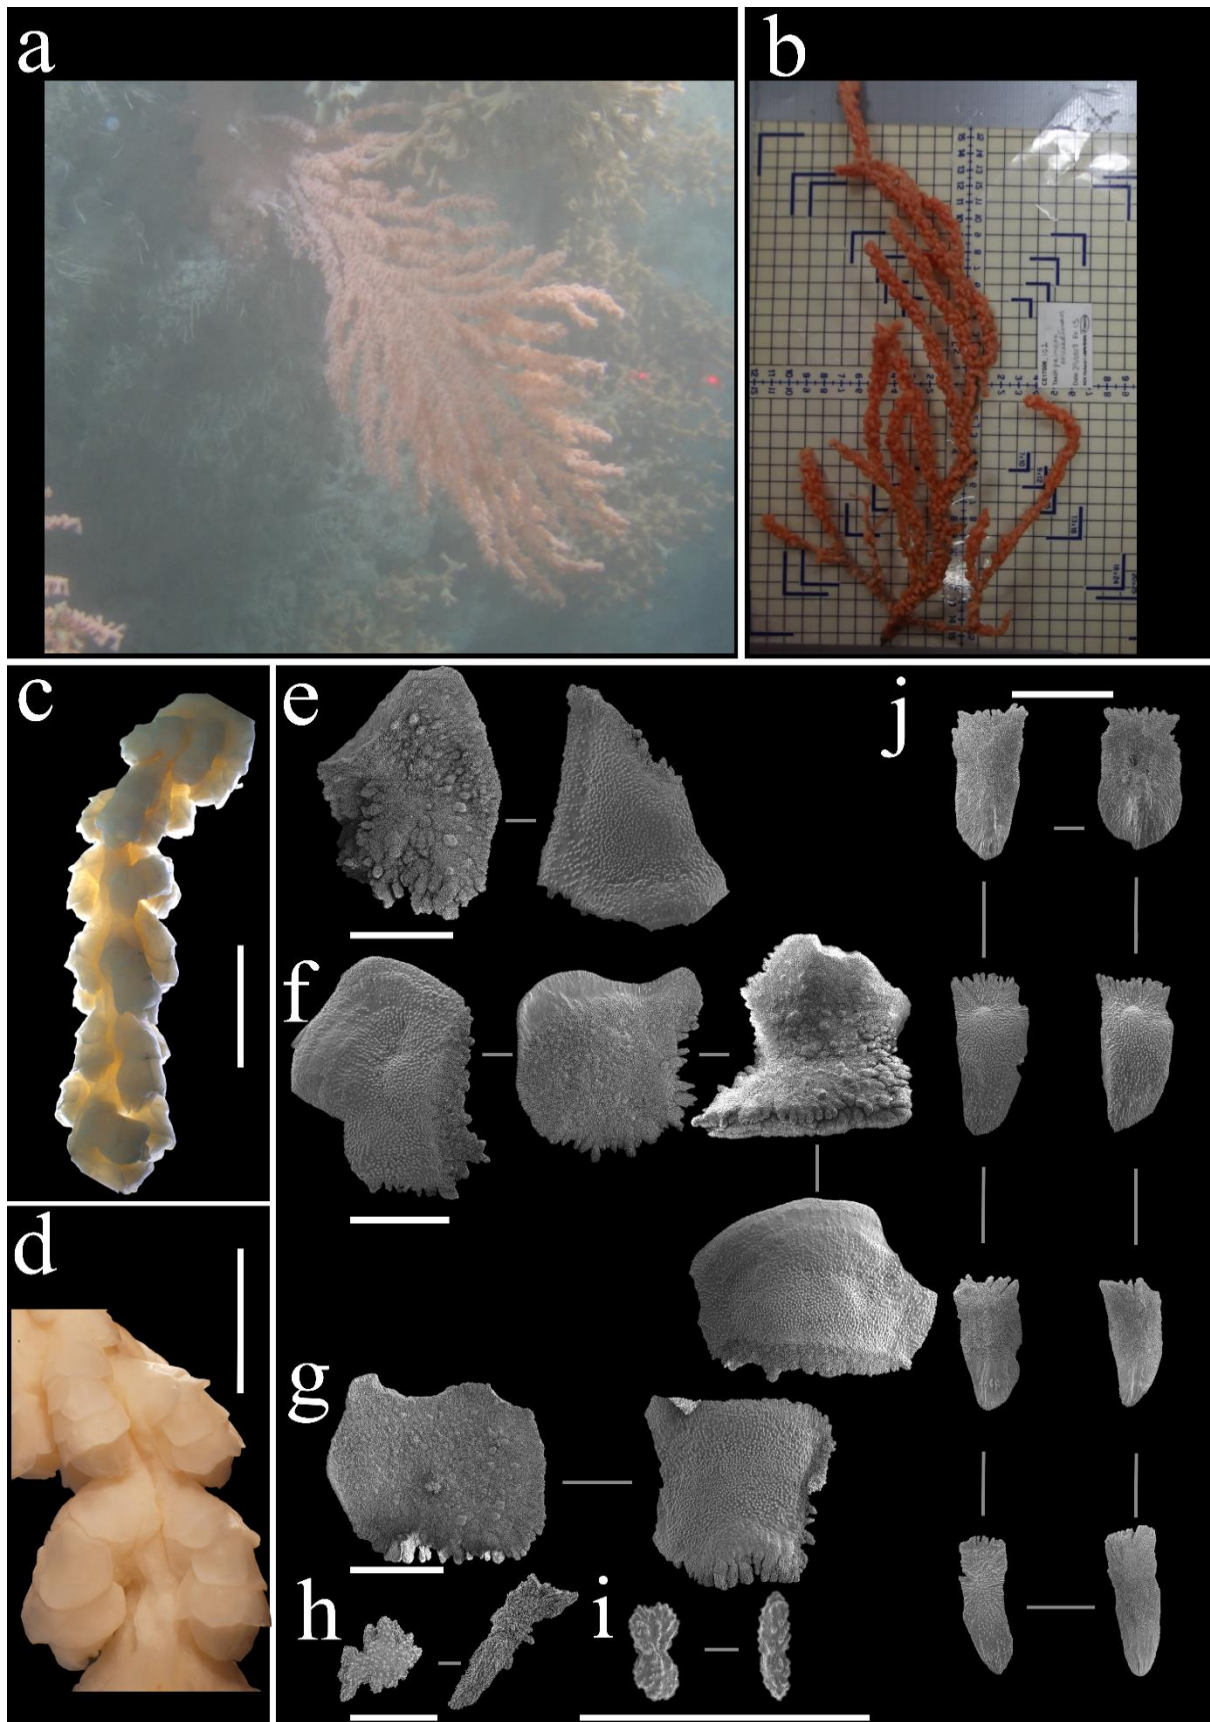

Figure S36. Morphotype 31 – Haplotype 36, *Primnoa* sp. voucher CE-17-101. **a**, *In-situ* image. **b**, *Ex-situ* image. **c**, Close up of the colony. **d**, Close up of polyps. **e**, Basal scales. **f**, Marginal scales. **g**, Medial scales. **h**, Sclerites from the coenenchyme. **i**, Sclerites from the tentacles. **j**, Opercular scales. Scale bar: c = 10 mm, d = 5 mm, e, f, g, and j = 1 mm, h and i = 500  $\mu$ m.

**Morphotype 32 – Haplotype 30 – *Narella bellissima*, (Kükenthal, 1915),**

***Vouchers:* CE-18-434**

***Location:*** North Porcupine Bank at 1348 m.

As diagnosed from original description.

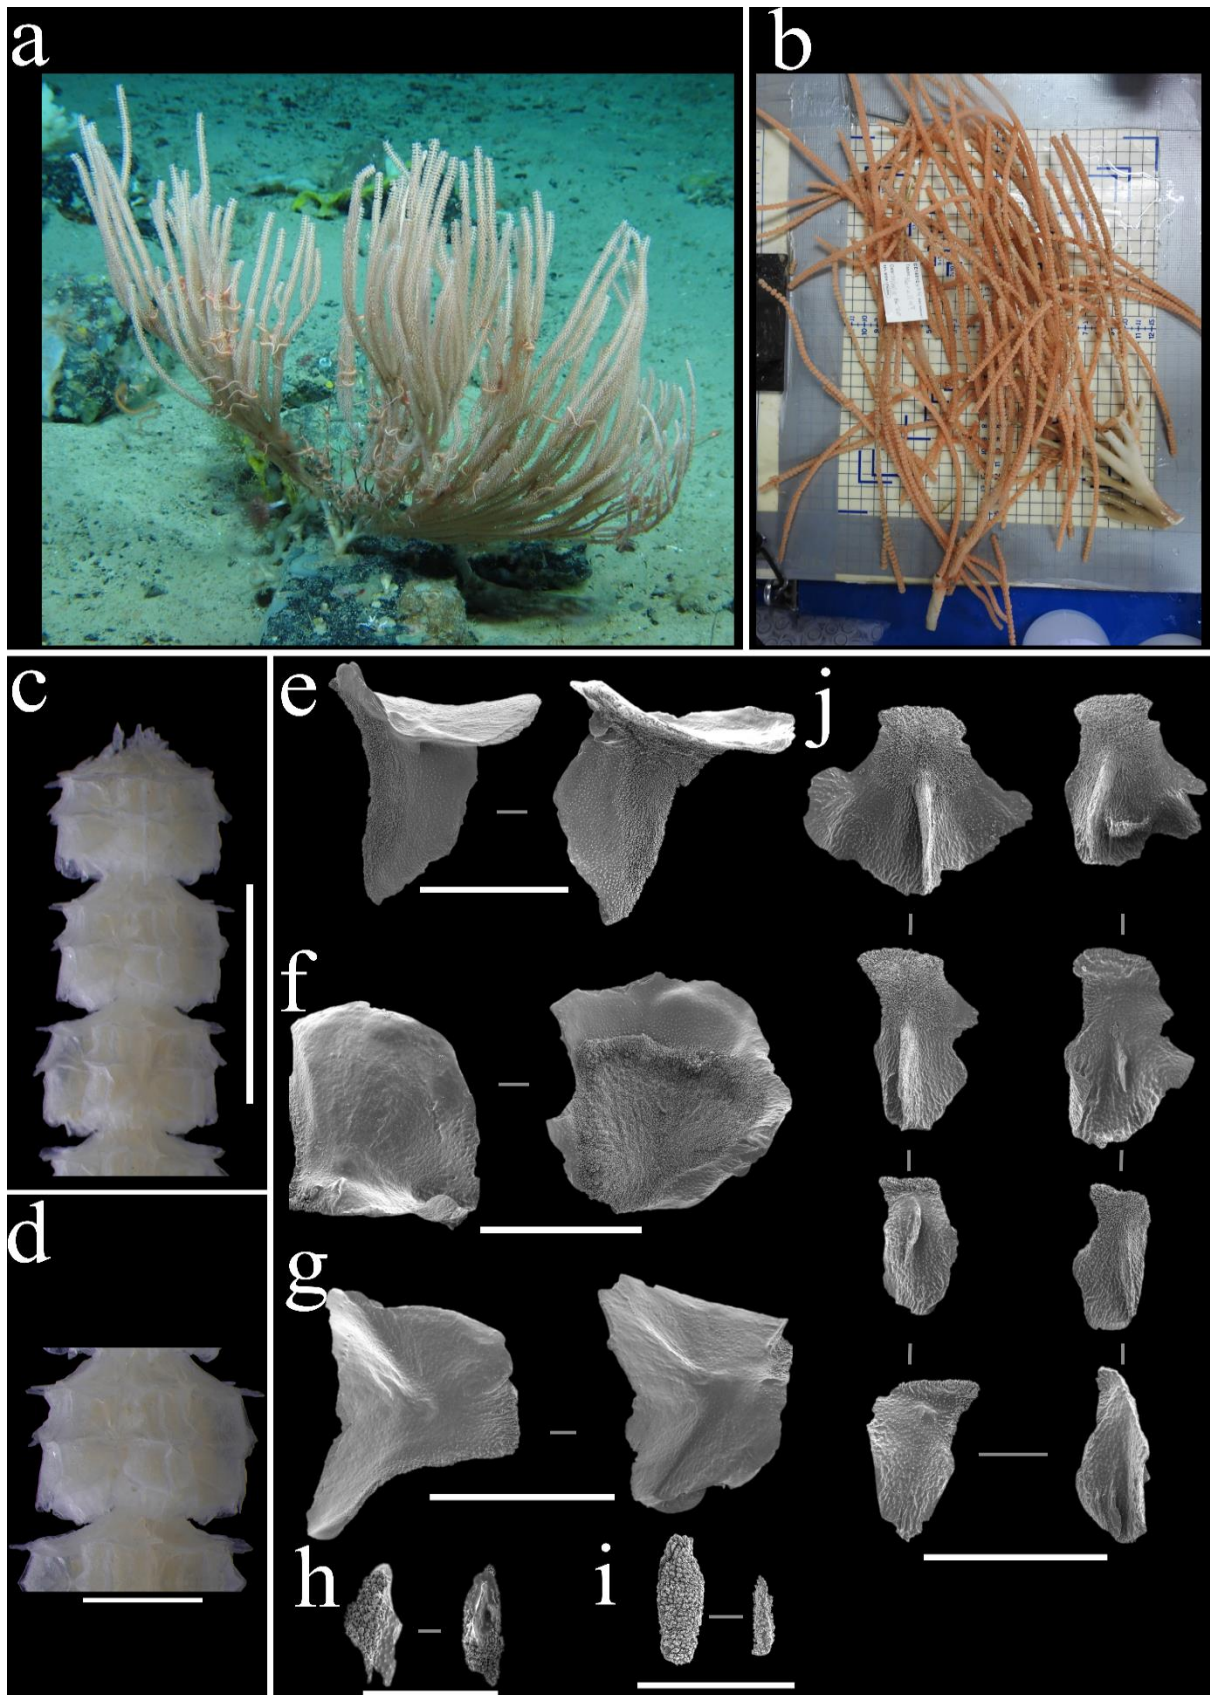

Figure S37. Morphotype 32 – Haplotype 30, *Narella bellissima*, voucher CE-18-434. **a**, *In-situ* image. **b**, *Ex-situ* image. **c**, Close up of the colony. **d**, Close up of polyps. **e**, Basal scales. **f**, Marginal scales. **g**, Medial scales. **h**, Sclerites from the coenenchyme. **i**, Sclerites from the tentacles. **j**, Opercular scales. Scale bar: c = 5 mm, d = 2 mm, e, f, g, and j = 1 mm, h and i = 500  $\mu$ m.

**Morphotype 33 – Haplotype 32 – *Narella versluysi* (Hickson 1909)**

*Vouchers:* **CE-18-321**

*Location:* North Porcupine Bank at 907 m.

As diagnosed from original description.



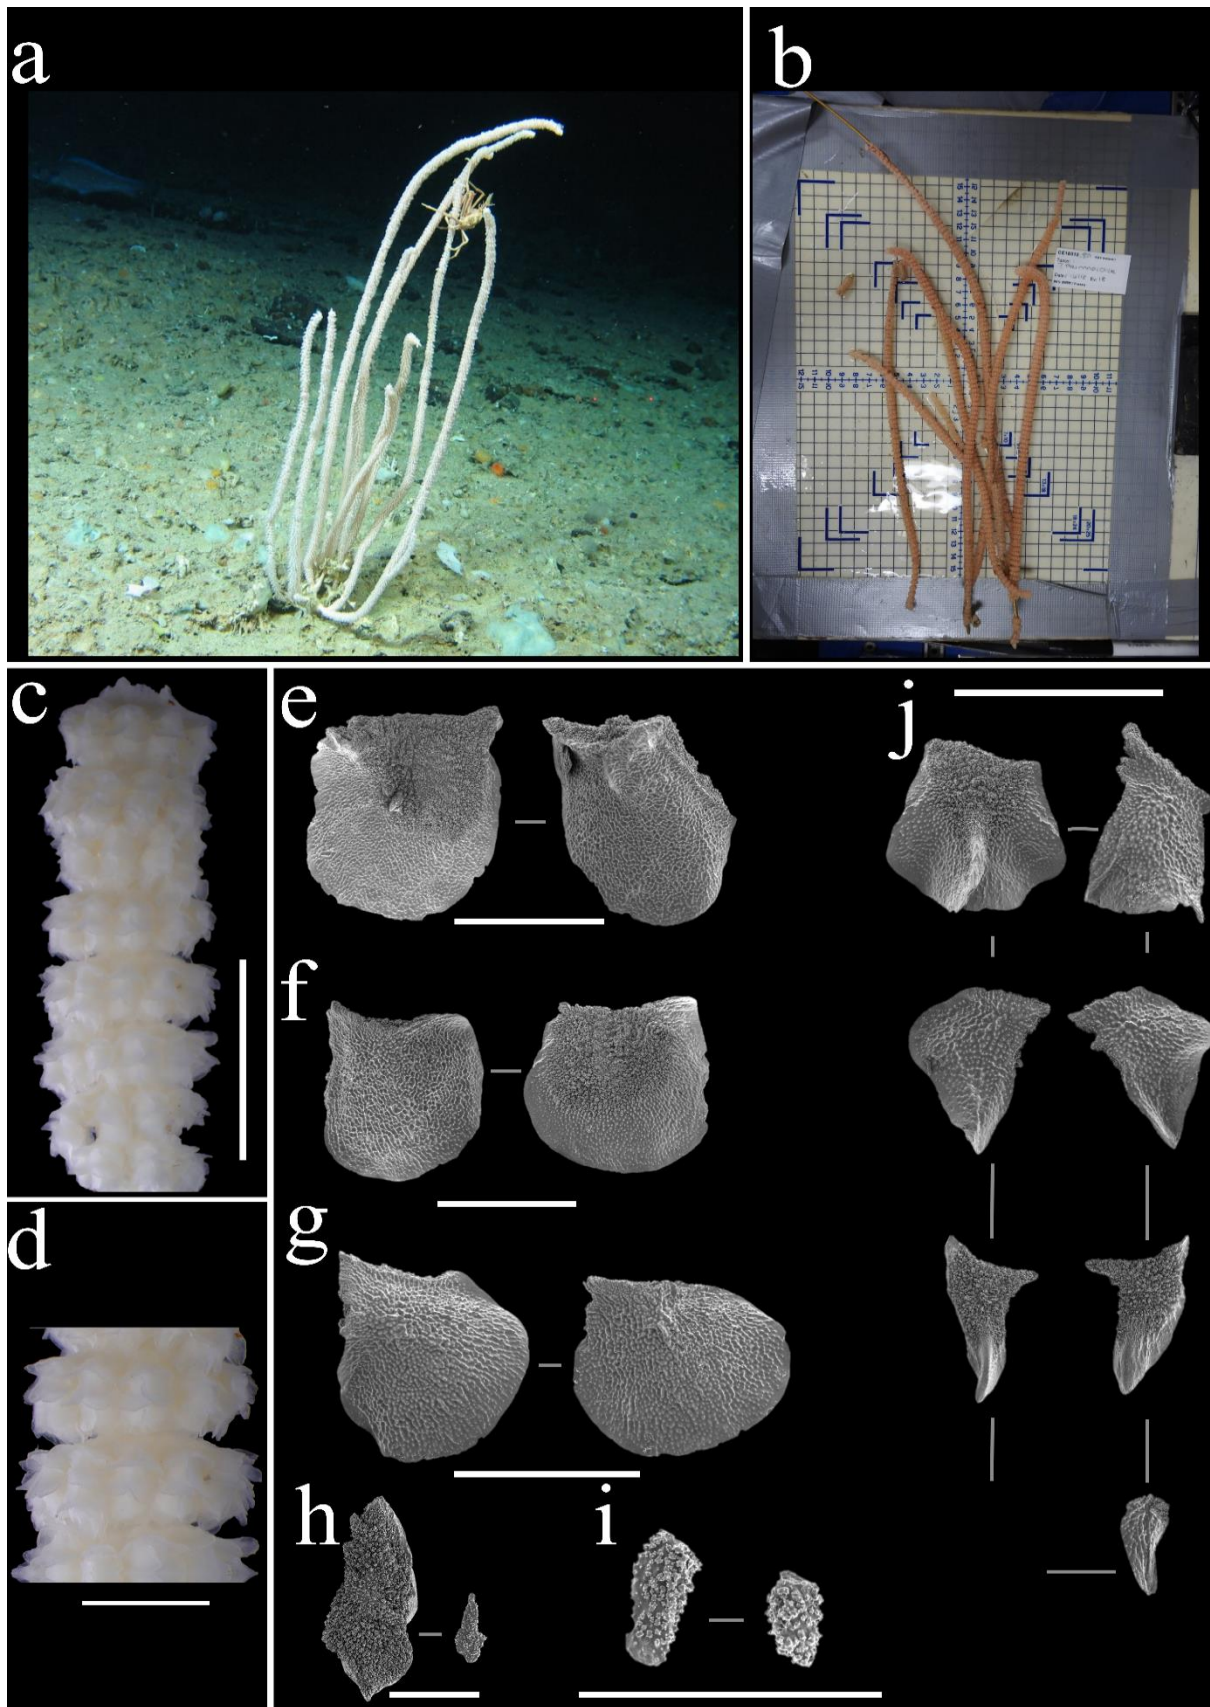

Figure S38. Morphotype 33 – Haplotype 32, *Narella versluysi*, voucher CE-18-321. **a**, *In-situ* image. **b**, *Ex-situ* image. **c**, Close up of the colony. **d**, Close up of polyps. **e**, Basal scales. **f**, Marginal scales. **g**, Medial scales. **h**, Sclerites from the coenenchyme. **i**, Sclerites from the tentacles. **j**, Opercular scales. Scale bar: c = 10 mm, d = 5 mm, e, f, g, and j = 1 mm, h and i = 500  $\mu$ m.



**Morphotype 34 – Haplotype 31 – *Candidella imbricata* (Johnson, 1862)**

*Vouchers:* **CE-17-290**, CE-17-305, CE-17-340, CE-17-346, CE-17-346, CE-17-352

*Location:* Whittard Canyon between 1589 and 1594 m.

As diagnosed from original description.

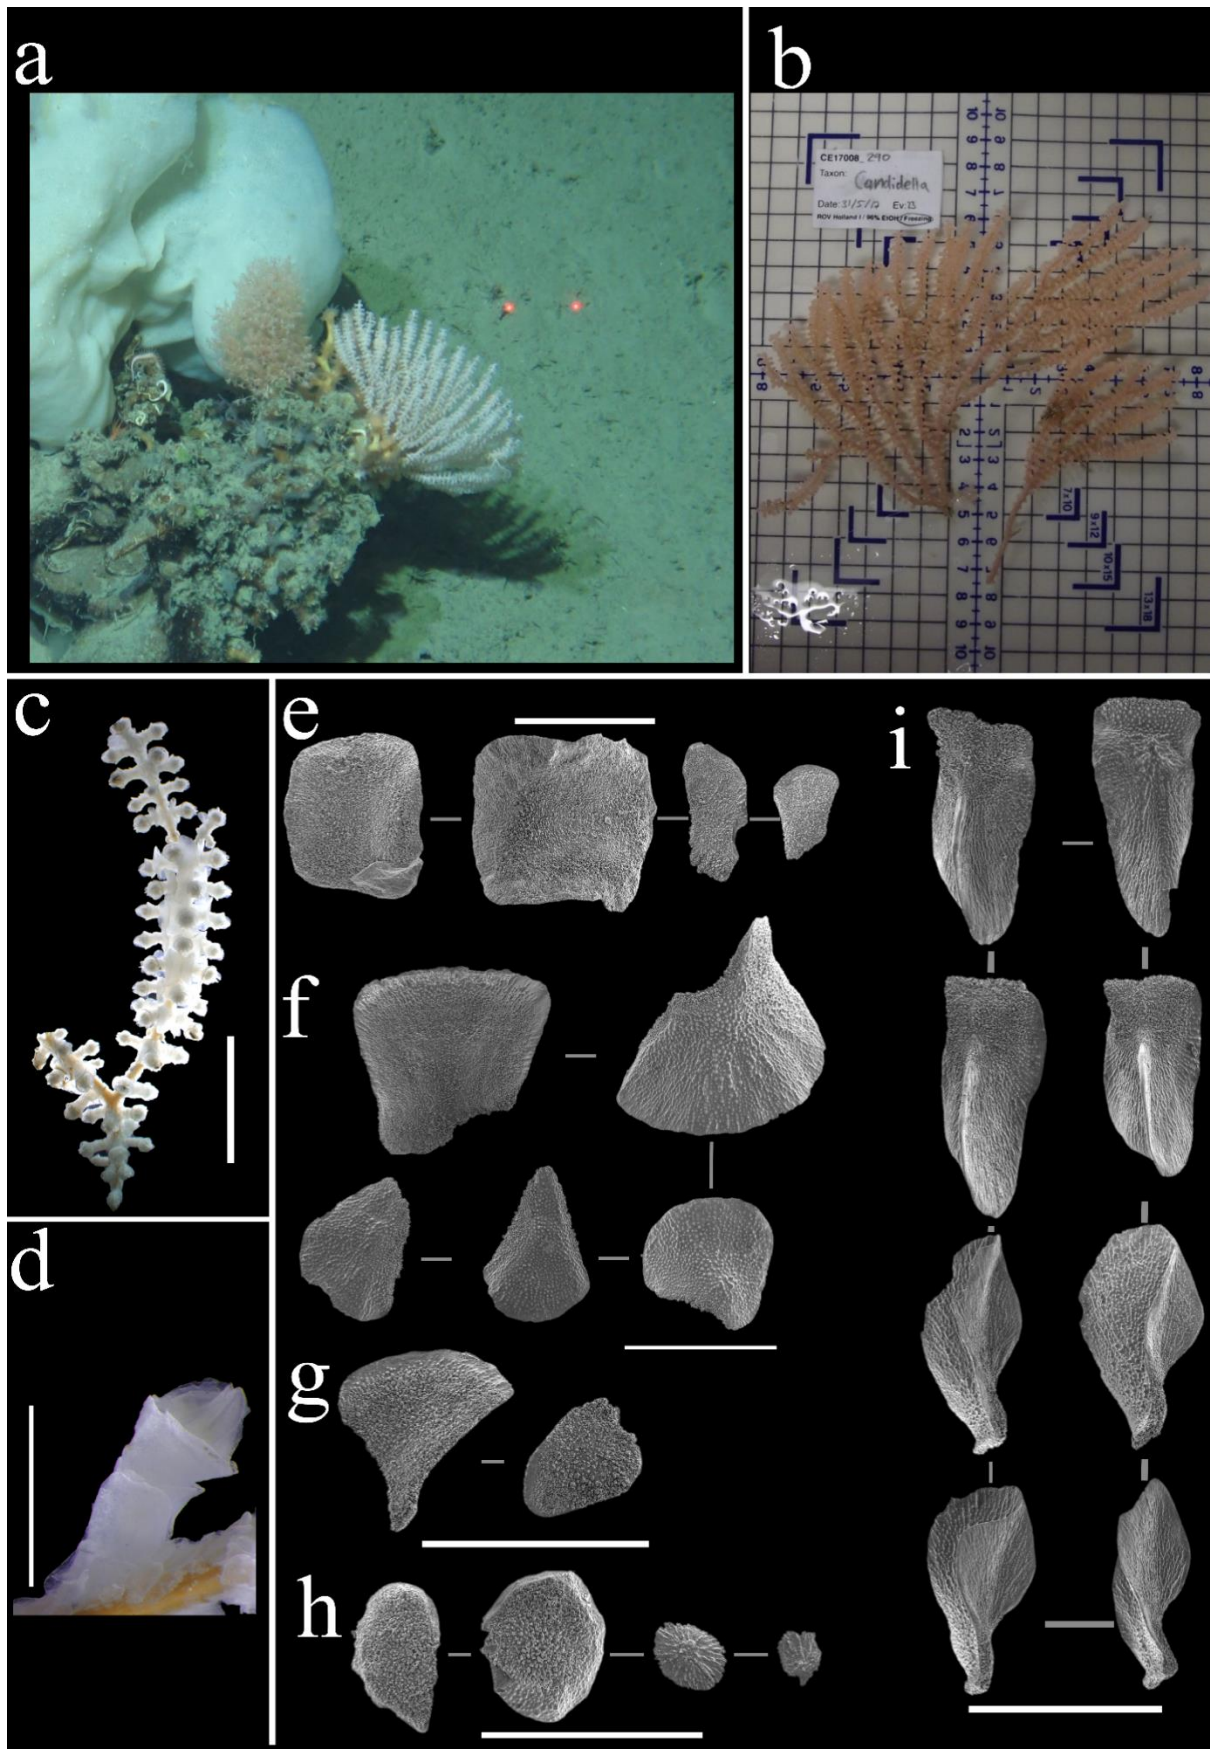

Figure S39. Morphotype 34 – Haplotype 31, *Candidella imbricata*, voucher CE-17-290. **a**, In-situ image. **b**, Ex-situ image. **c**, Close up of the colony. **d**, Close up of polyps. **e**, Basal scales. **f**, Marginal scales. **g**, Medial scales. **h**, Sclerites from the coenenchyme. **i**, Opercular scales. Scale bar: c = 10 mm, d = 2 mm, e, f, g, h, and i = 500 µm.

**Morphotype 35 – Haplotype 37 - *Thouarella grasshoffi* Cairns, 2006**

*Vouchers:* **CE-18-261**, CE-18,272. CE-18,278. CE-18-441, CE-18-557

*Location:* North Porcupine Bank between 1291 and 1435 m.

As diagnosed from original description.

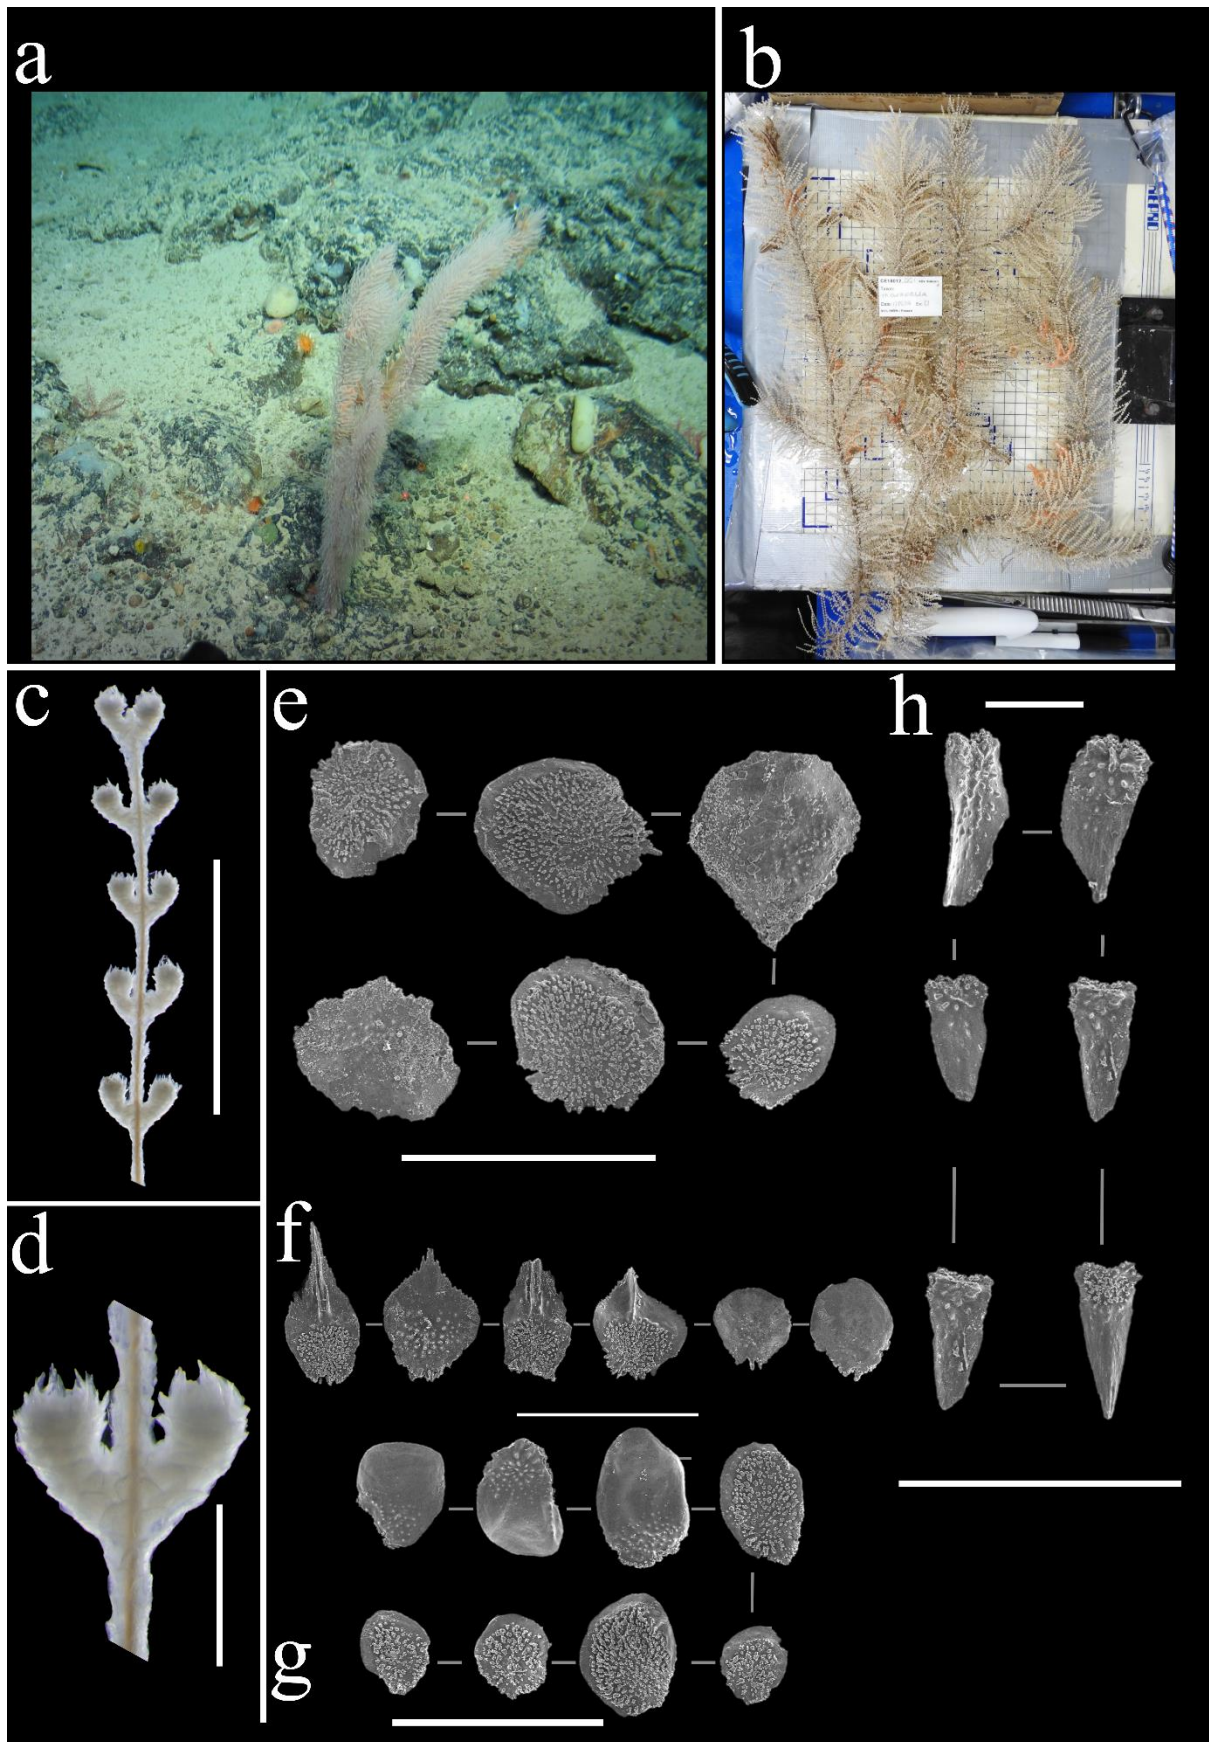

Figure S40. Morphotype 35 – Haplotype 37, *Thouarella grasshoffi*, voucher CE-18-261. **a**, *In-situ* image. **b**, *Ex-situ* image. **c**, Close up of the colony. **d**, Close up of polyps. **e**, Body scales. **f**, Marginal scales. **g**, Sclerites from the coenenchyme. **h**, Opercular scales. Scale bar: c = 5 mm, d = 1 mm, e, f, g, and h = 500 µm.

**Morphotype 36 – Haplotype 38 – *Calyptrophora clinata* Cairns, 2007**

*Vouchers:* **CE-18-568**

*Location:* North Porcupine Bank at 1397 m.

As diagnosed from original description.



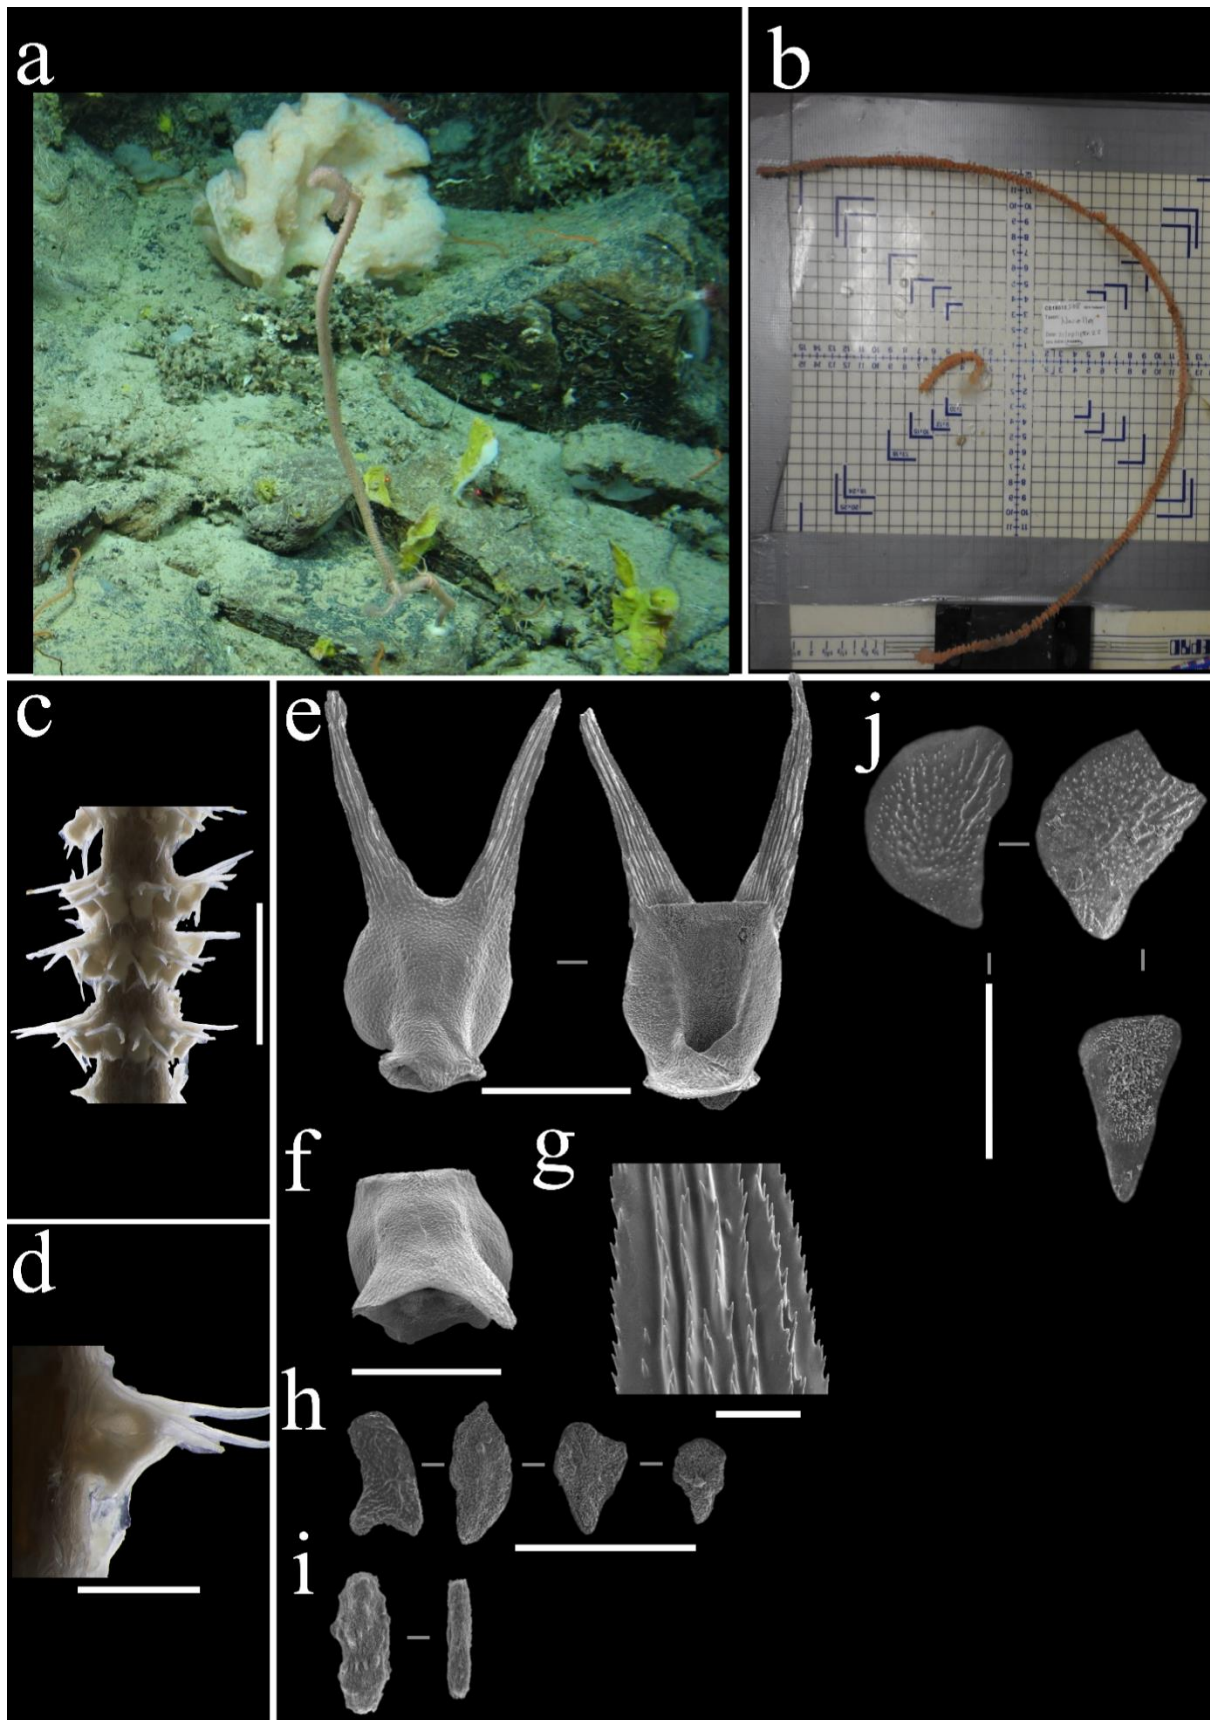

Figure S41. Morphotype 36 – Haplotype 38, *Calyptrophora clinata*, voucher CE-18-568. **a**, *In-situ* image. **b**, *Ex-situ* image. **c**, Close up of the colony. **d**, Close up of polyps. **e**, Fused Basal scales. **f**, Buccal Scales. **g**, Zoomed image of serrated spines on basal scales. **h**, Sclerites from the coenenchyme. **i**, Sclerites from the tenacles. **j**, Opercular scales. Scale bar: c = 5 mm, d = 2 mm, e, f, and h = 1 mm, g and i = 100  $\mu$ m, and j = 500  $\mu$ m.

**2.1. Family Chrysogorgiidae**  
**Morphotype 37 – Haplotype 25**

***Chrysogorgia* Group 7**

*Vouchers:* **CE-17-364**

*Location:* Whittard Canyon at 1599 m.

Identified by CB Untiedt.

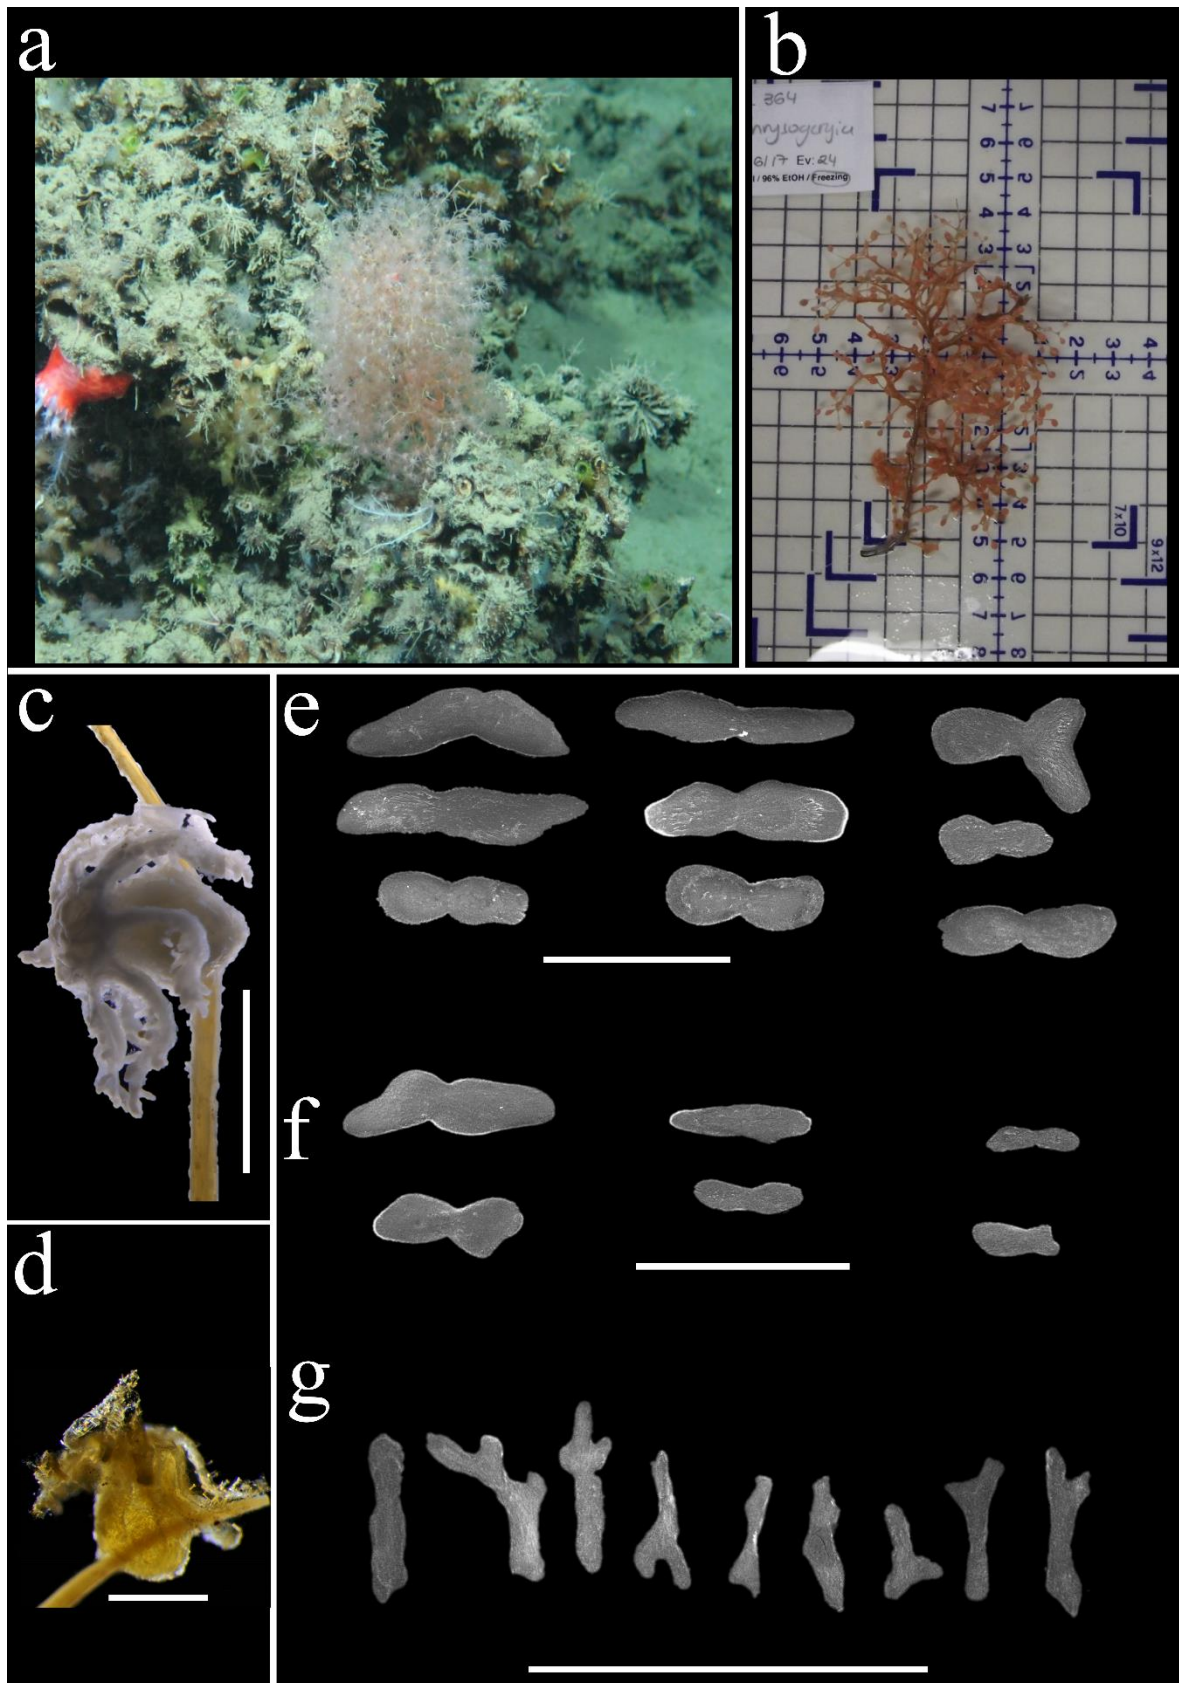

Figure S42. Morphotype 37 – Haplotype 25, *Chrysogorgia* Group 7, voucher CE-17-364. **a**, In-situ image. **b**, Ex-situ image. **c**, Close up of the polyp. **d**, Close up of cleared polyps. **e**, Sclerites from the polyp body. **f**, Sclerites from the coenenchyme. **g**, Sclerites from the tentacles. Scale bar: c and d = 1 mm, e and f, = 200  $\mu$ m, and g = 500  $\mu$ m.

**Morphotype 38 – Haplotype 26**

***Chrysogorgia* Group 7**

***Vouchers: CE-17-271***

***Location: Whittard Canyon at 1657 m.***

***Identified by CB Untiedt.***



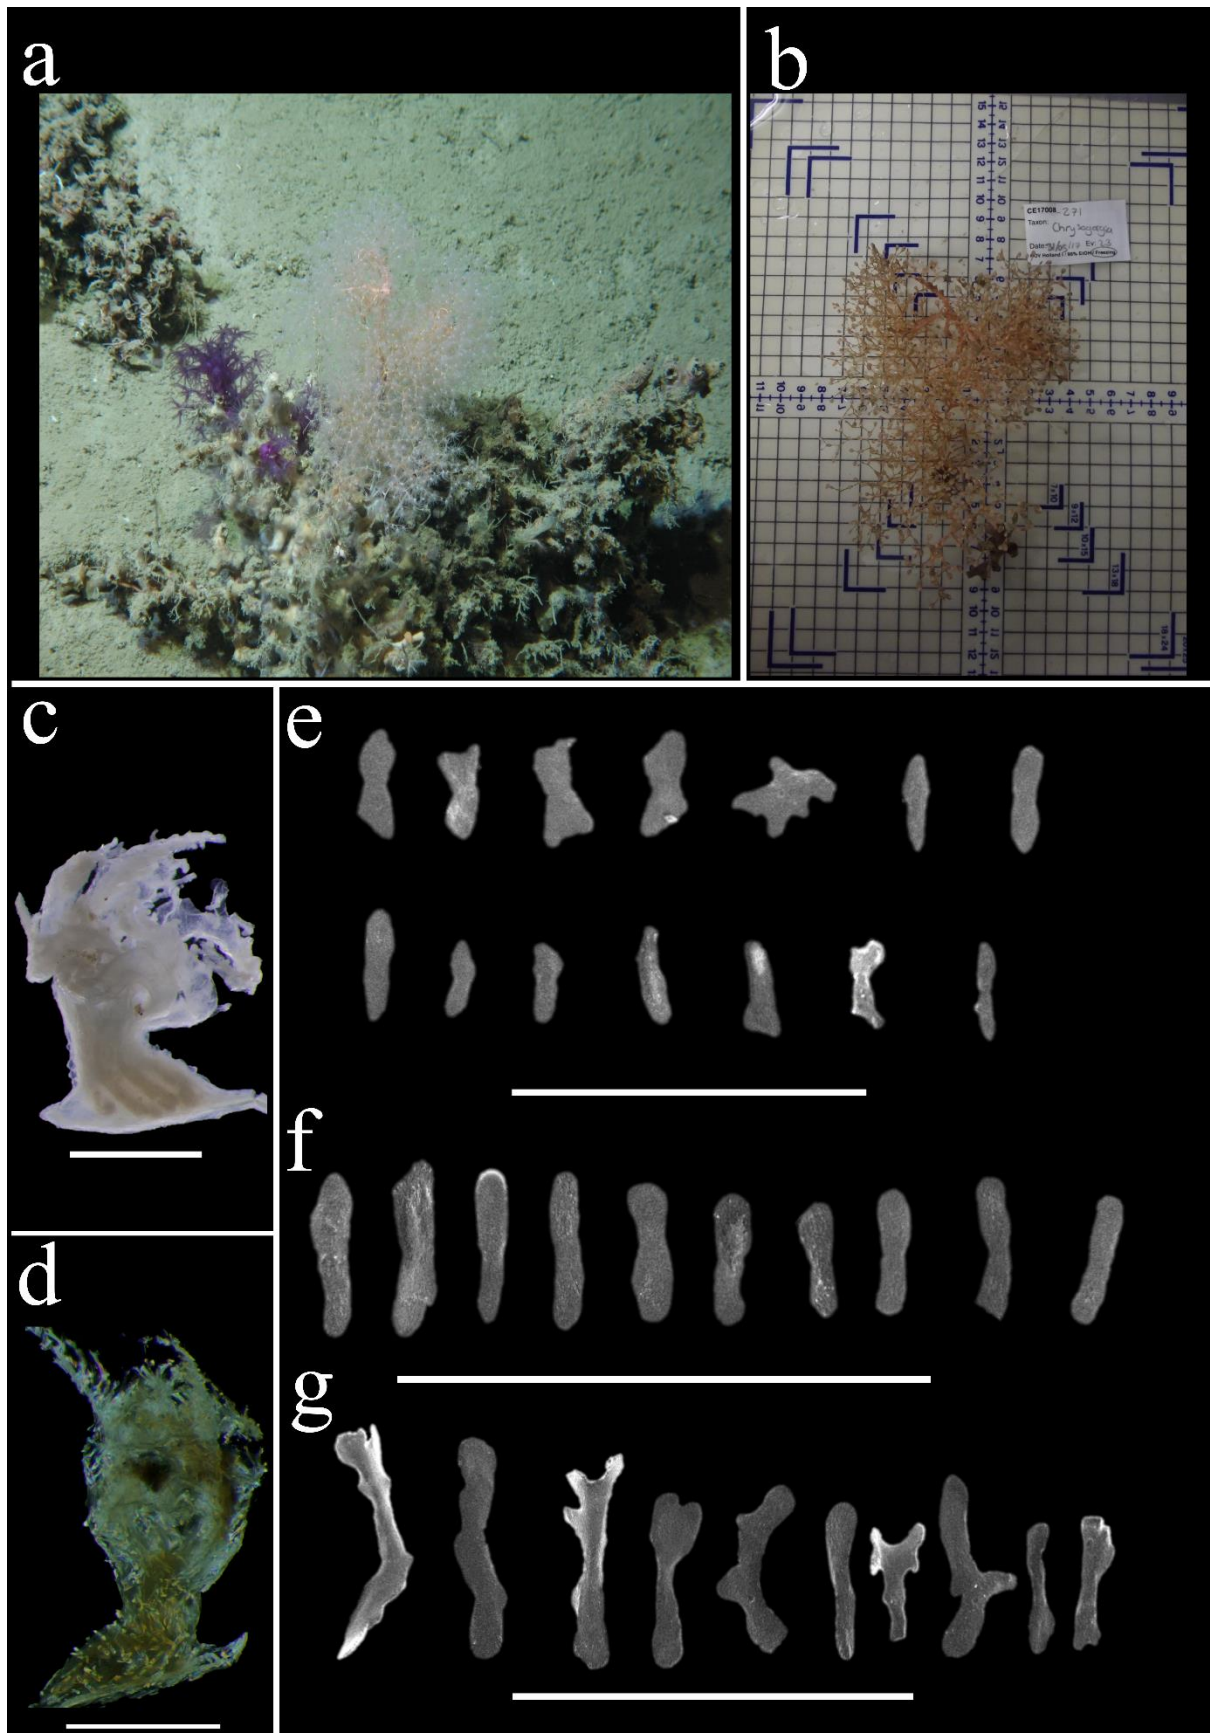



**Morphotype 39 – Haplotype 27**

***Chrysogorgia* Group 7**

*Vouchers:* CE-17-93, CE-17-124, **CE-17-129**, CE-17-144,

*Location:* Whittard Canyon between 1460 m and 1505 m.

Identified by CB Untiedt.

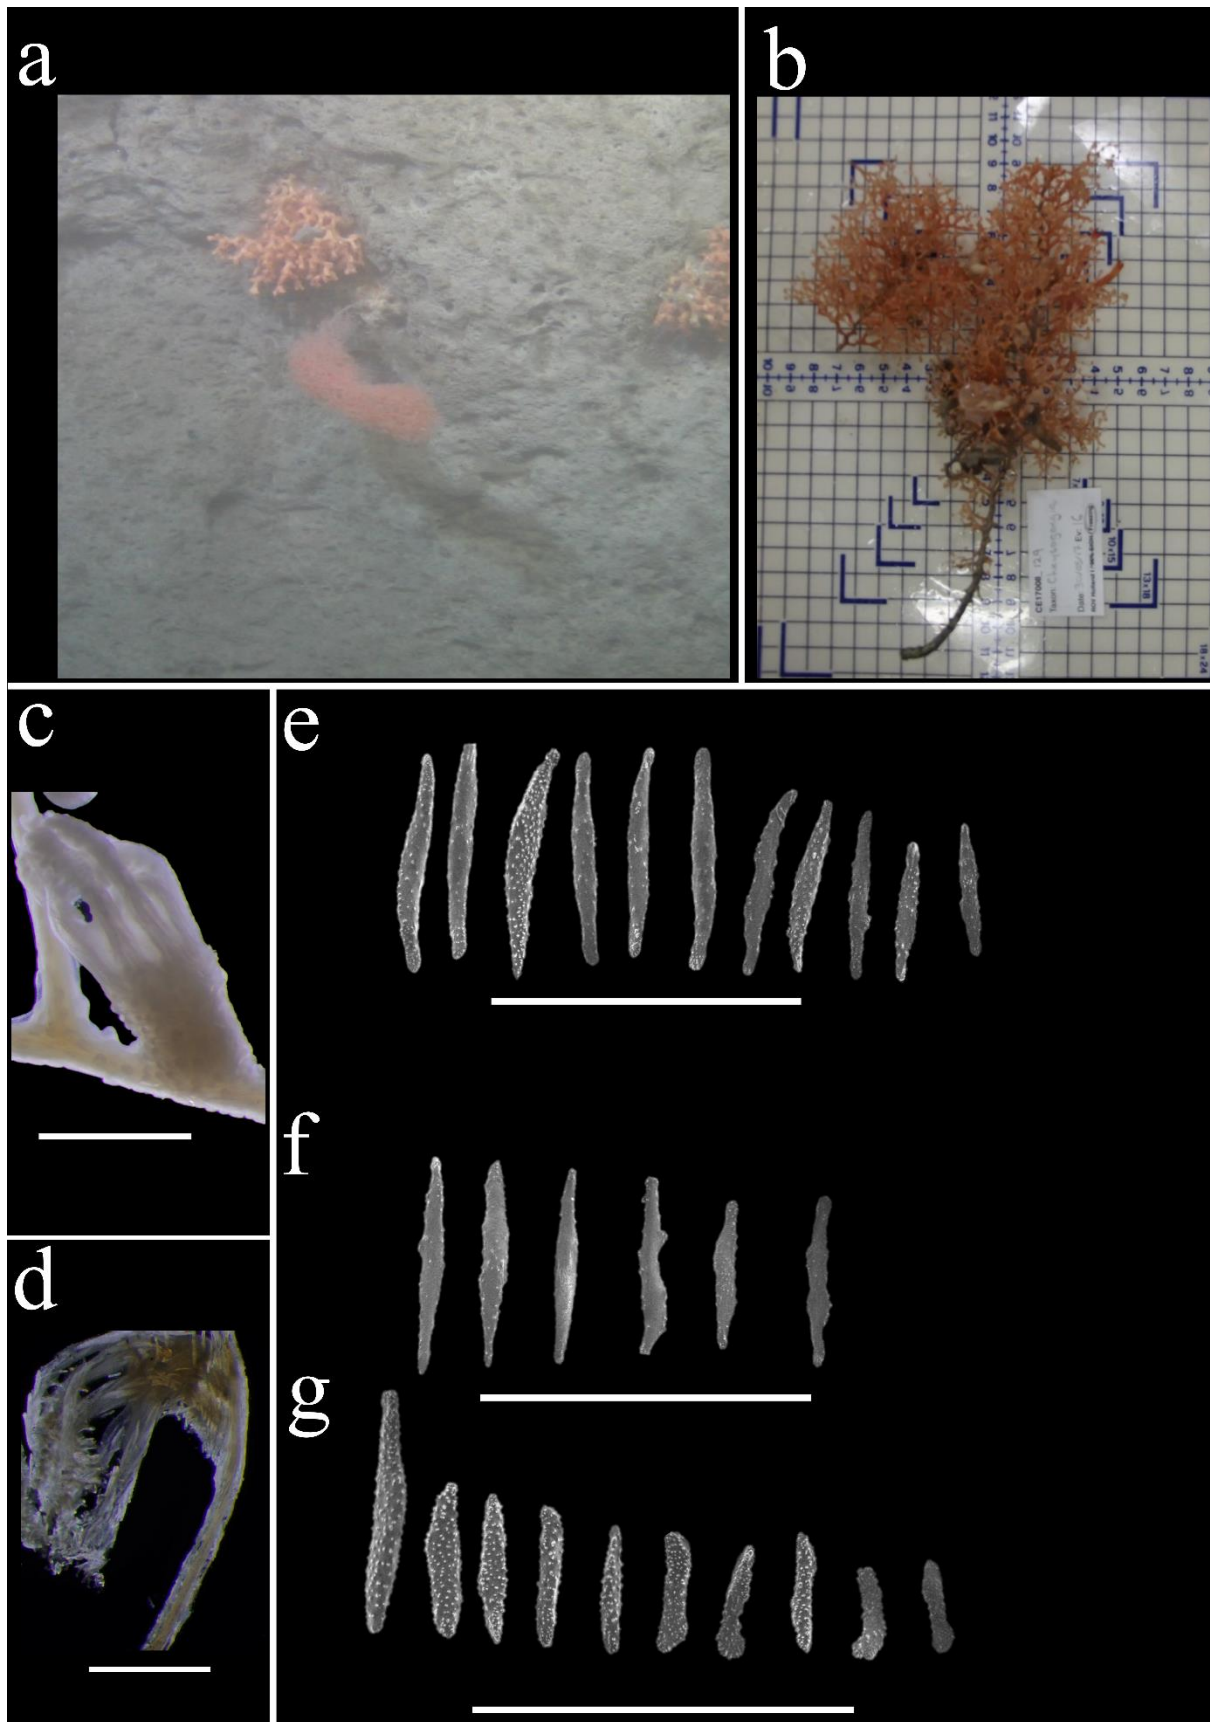

Figure S44. Morphotype 39 – Haplotype 27, *Chrysogorgia* Group 7, voucher CE-17-129. **a**, *In-situ* image. **b**, *Ex-situ* image. **c**, Close up of the polyp. **d**, Close up of cleared polyps. **e**, Sclerites from the polyp body. **f**, Sclerites from the coenenchyme. **g**, Sclerites from the tentacles. Scale bar: c, d, e, f, and g = 500  $\mu$ m.

**Morphotype 40 – Haplotype 27**

***Chrysogorgia* Group 7**

*Vouchers:* CE-17-87, **CE-17-283**, CE-17-364, CE-18-229

*Location:* Whittard Canyon and North Porcupine Bank between 1301 m and 1658 m

Identified by CB Untiedt.

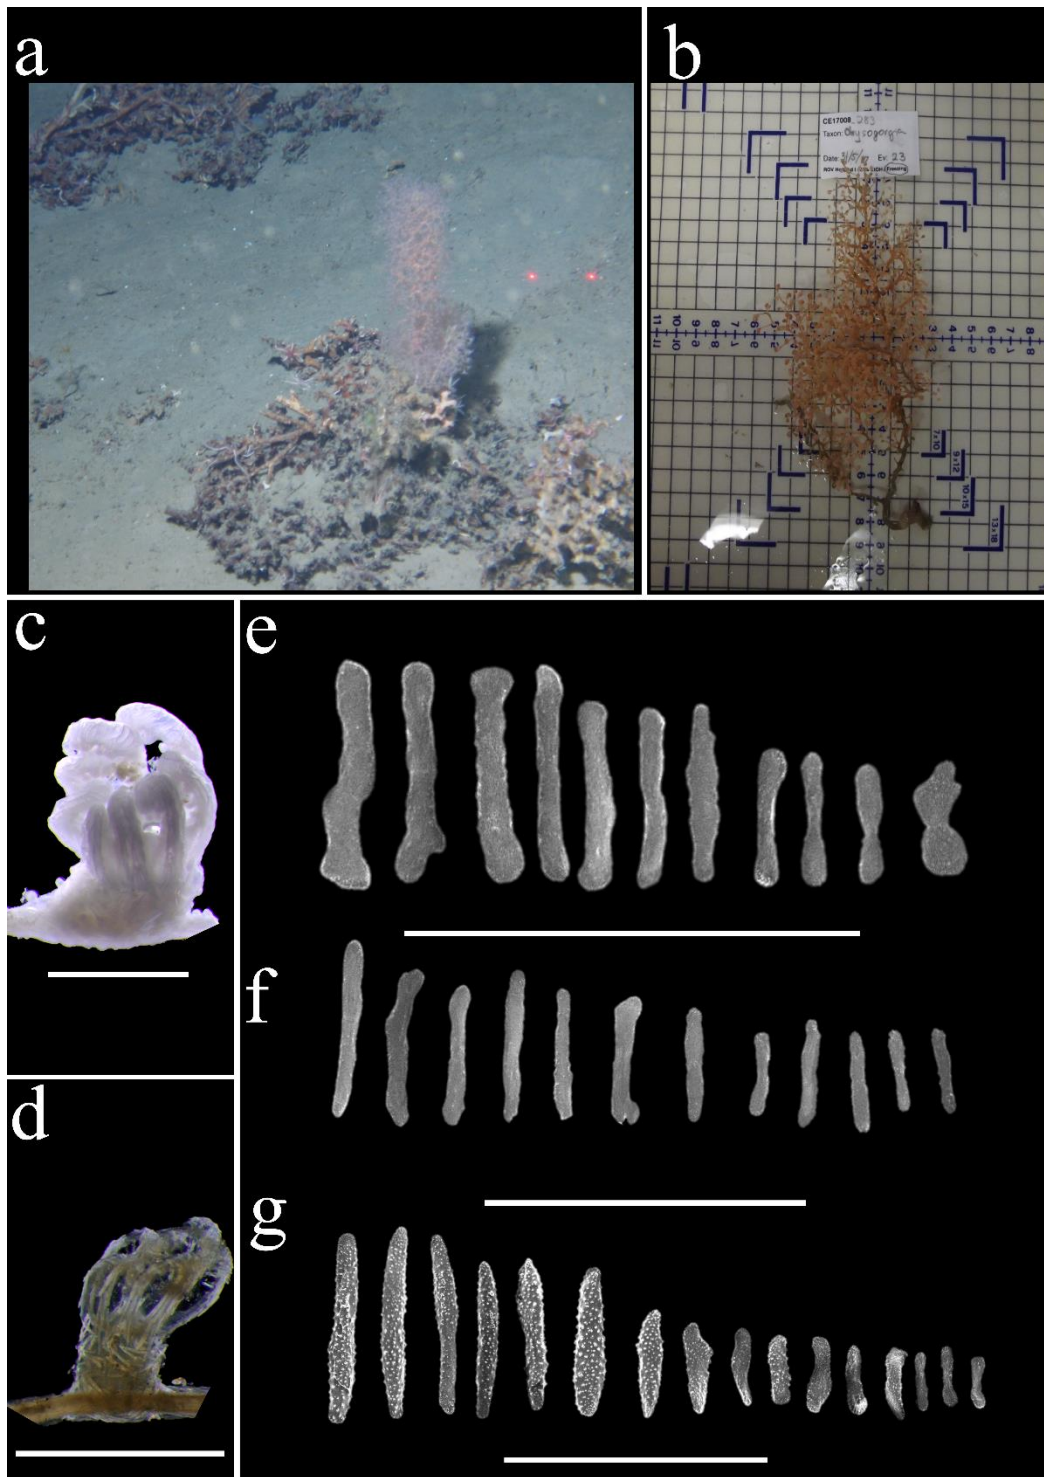

Figure S45. Morphotype 40 – Haplotype 27, *Chrysogorgia* Group 7, voucher CE-17-283. **a**, *In-situ* image. **b**, *Ex-situ* image. **c**, Close up of the polyp. **d**, Close up of cleared polyps. **e**, Sclerites from the polyp body. **f**, Sclerites from the coenenchyme. **g**, Sclerites from the tentacles. Scale bar: c and d = 1 mm, e, f, and g = 500  $\mu$ m.

**Morphotype 41 – Haplotype 27**

***Chrysogorgia* Group 7**

*Vouchers:* CE-18-289, **CE-18-292**

*Location:* North Porcupine Bank between 1292 m and 1299 m.

Identified by CB Untiedt.



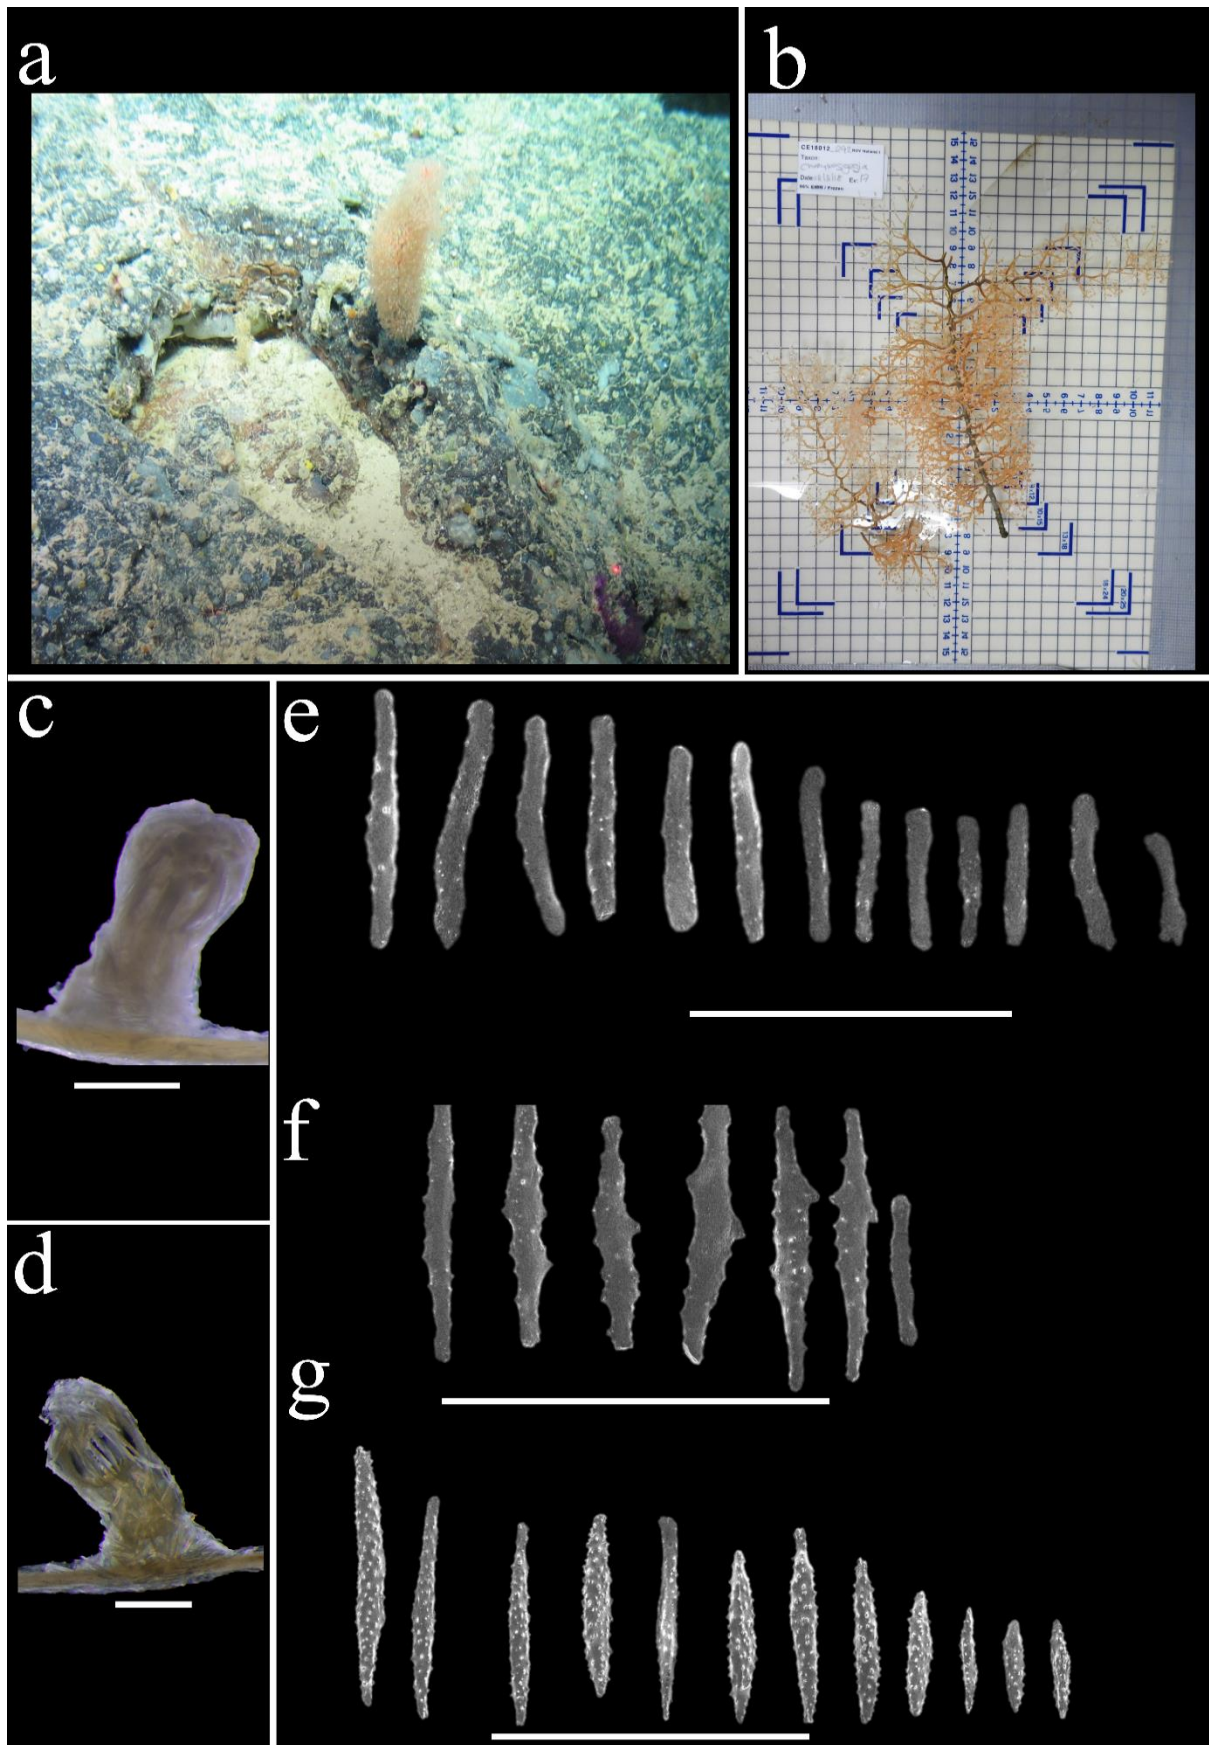

Figure S46. Morphotype 41 – Haplotype 27, *Chrysogorgia* Group 7, voucher CE-18-292. **a**, In-situ image. **b**, Ex-situ image. **c**, Close up of the polyp. **d**, Close up of cleared polyps. **e**, Sclerites from the polyp body. **f**, Sclerites from the coenenchyme. **g**, Sclerites from the tentacles. Scale bar: c, d, e, f, and g = 500  $\mu$ m.

**Morphotype 42 – Haplotype 28**

*Dasygorgia* sp.

*Vouchers:* CE-18-154, **CE-18-418**, CE-18-419

*Location:* North Porcupine Bank between 1772 m and 1787 m.

Identified by CB Untiedt.

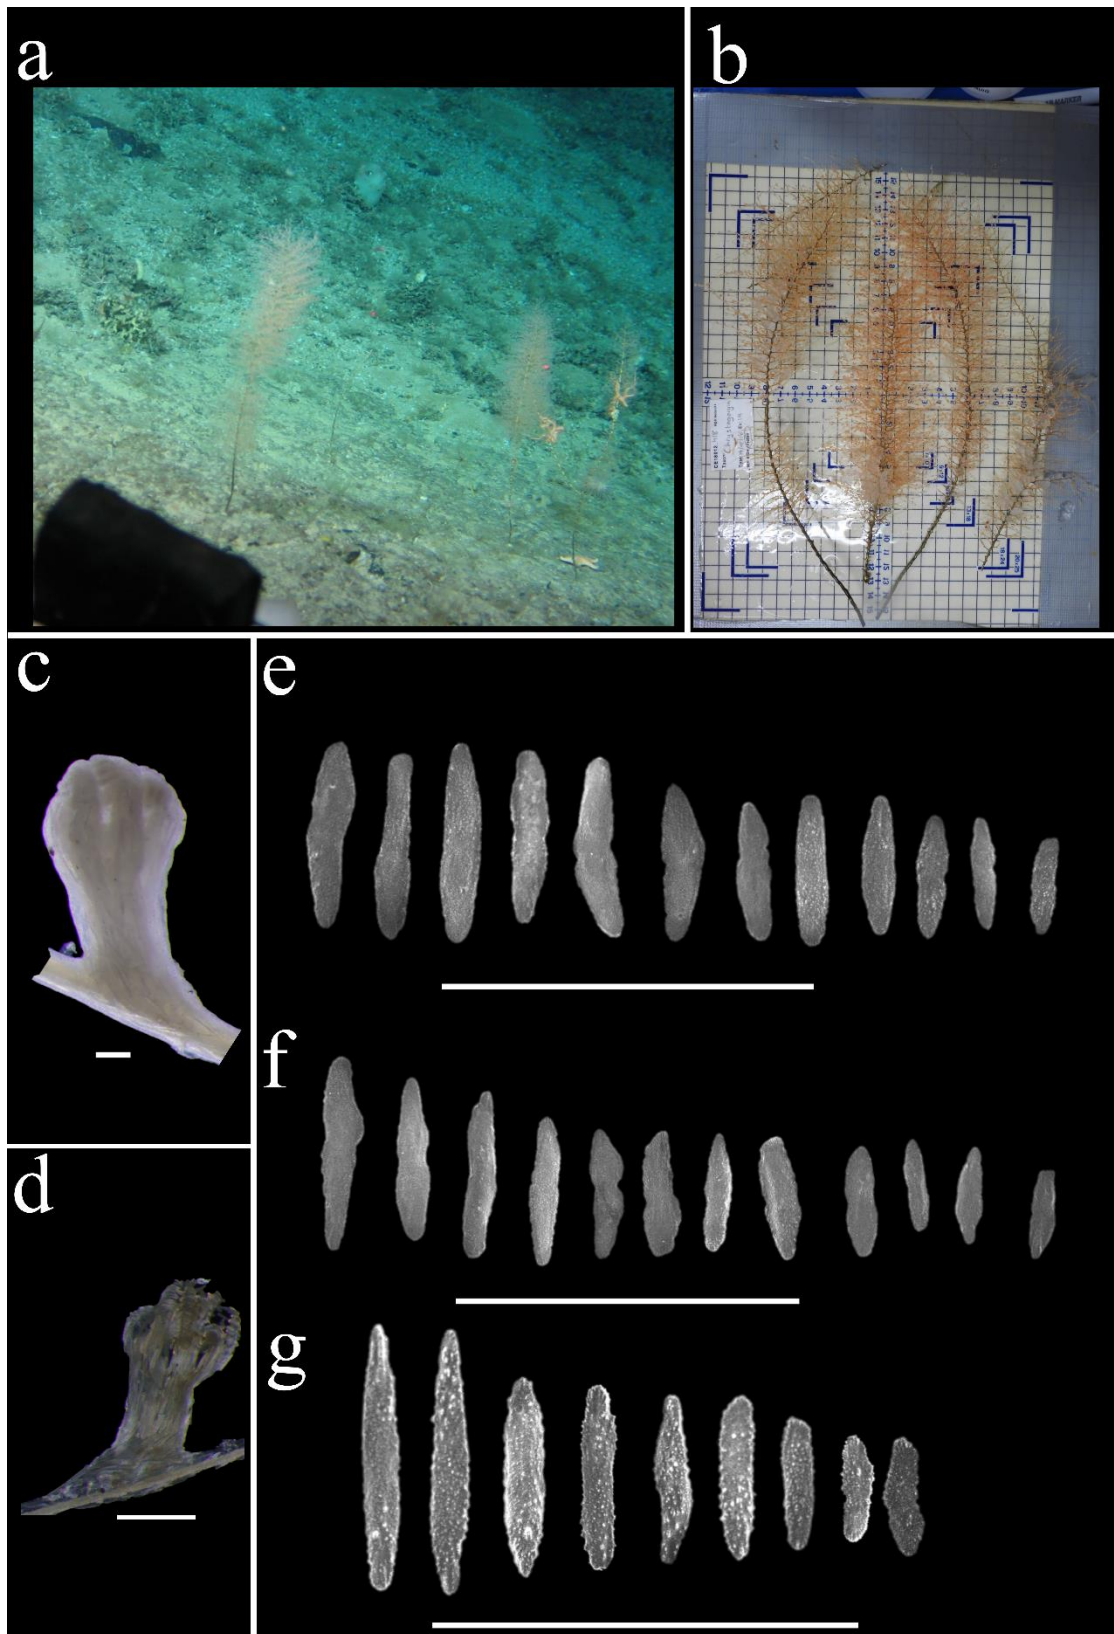

Figure S47. Morphotype 42 – Haplotype 28, *Dasygorgia* sp., voucher CE-18-418. **a**, *In-situ* image. **b**, *Ex-situ* image. **c**, Close up of the polyp. **d**, Close up of cleared polyps. **e**, Sclerites from the polyp body. **f**, Sclerites from the coenenchyme. **g**, Sclerites from the tentacles. Scale bar: c. d. e, f, and g = 500  $\mu$ m.

**Morphotype 43 – Haplotype 29**

**Group 1**

*Vouchers:* CE-17-388, **CE-18-237**, CE-18-248, CE-18-295, CE-18-632a

*Location:* Whittard Canyon and North Porcupine Bank between 1296 and 1418 m.

Identified by CB Untiedt.



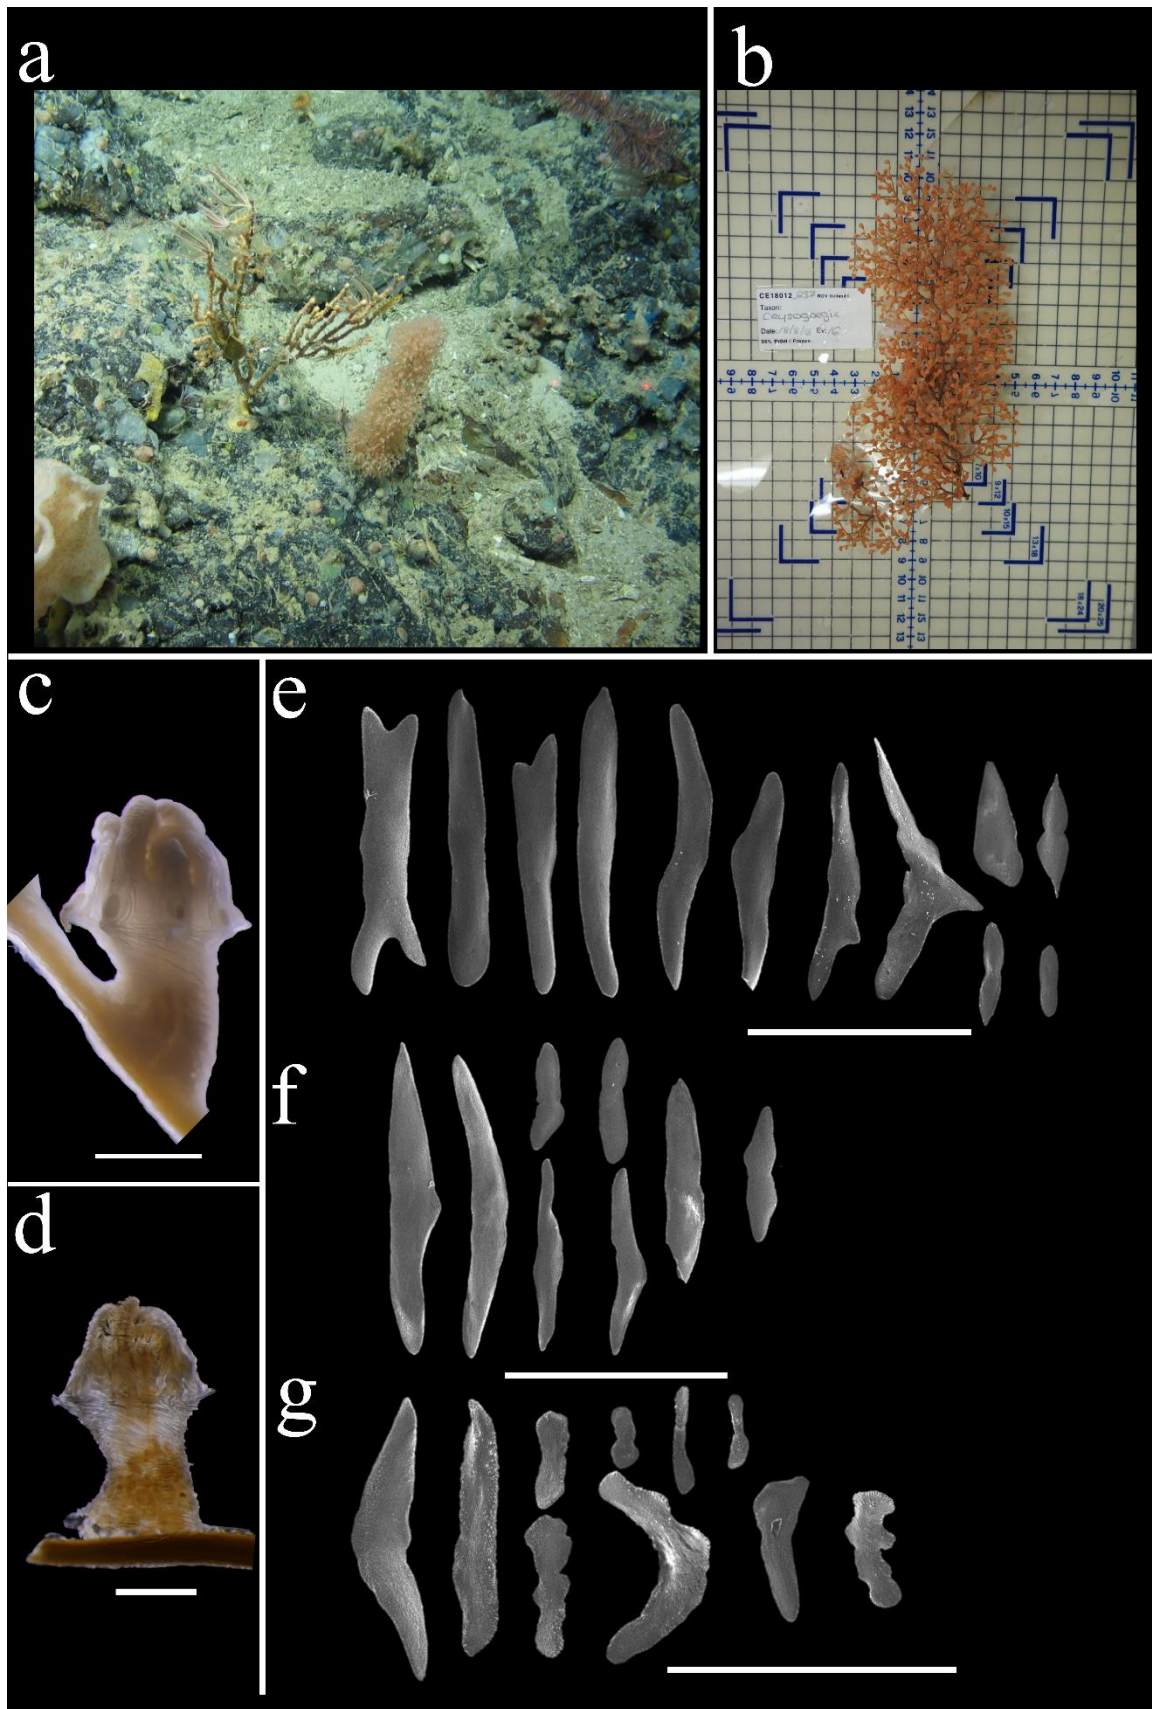

Figure S48. Morphotype 43 – Haplotype 29, *Chrysogorgia* Group 1, voucher CE-18-237. **a**, *In-situ* image. **b**, *Ex-situ* image. **c**, Close up of the polyp. **d**, Close up of cleared polyps. **e**, Sclerites from the polyp body. **f**, Sclerites from the coenenchyme. **g**, Sclerites from the tentacles. Scale bar: c and d = 1 mm, e, f, and g = 500 µm.



### **3. Family Chelidonisididae**

**Morphotype 44 – Haplotype 23 – *Chelidonisis aurantiaca***

*Vouchers:* **CE-17-181**

*Location:* Whittard Canyon at 1507 m.

As diagnosed from original description.

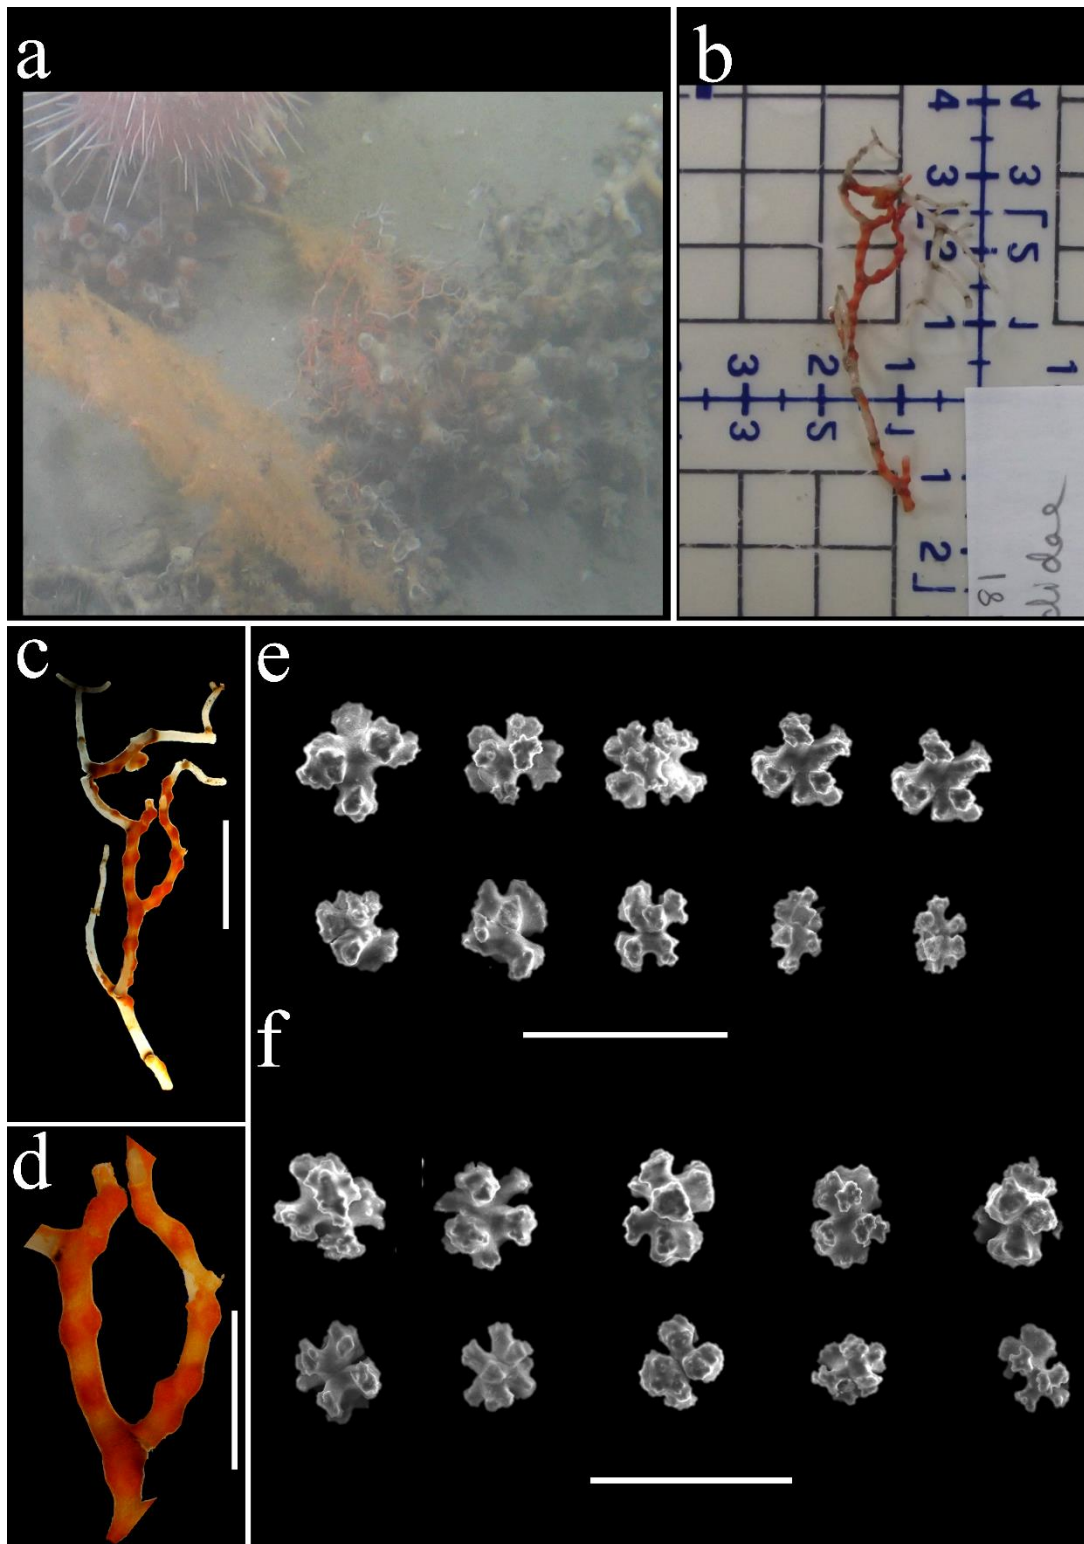

Figure S49. Morphotype 44 – Haplotype 23, *Chelidonisis aurantiaca*, voucher CE-17-181. **a**, *In-situ* image. **b**, *Ex-situ* image. **c**, Close up of the fragment. **d**, Close up of polyps. **e**, Sclerites from the polyp body. **f**, Sclerites from the coenenchyme. Scale bar: c and d = 10 mm, e = 5 mm, f and g = 100  $\mu$ m.

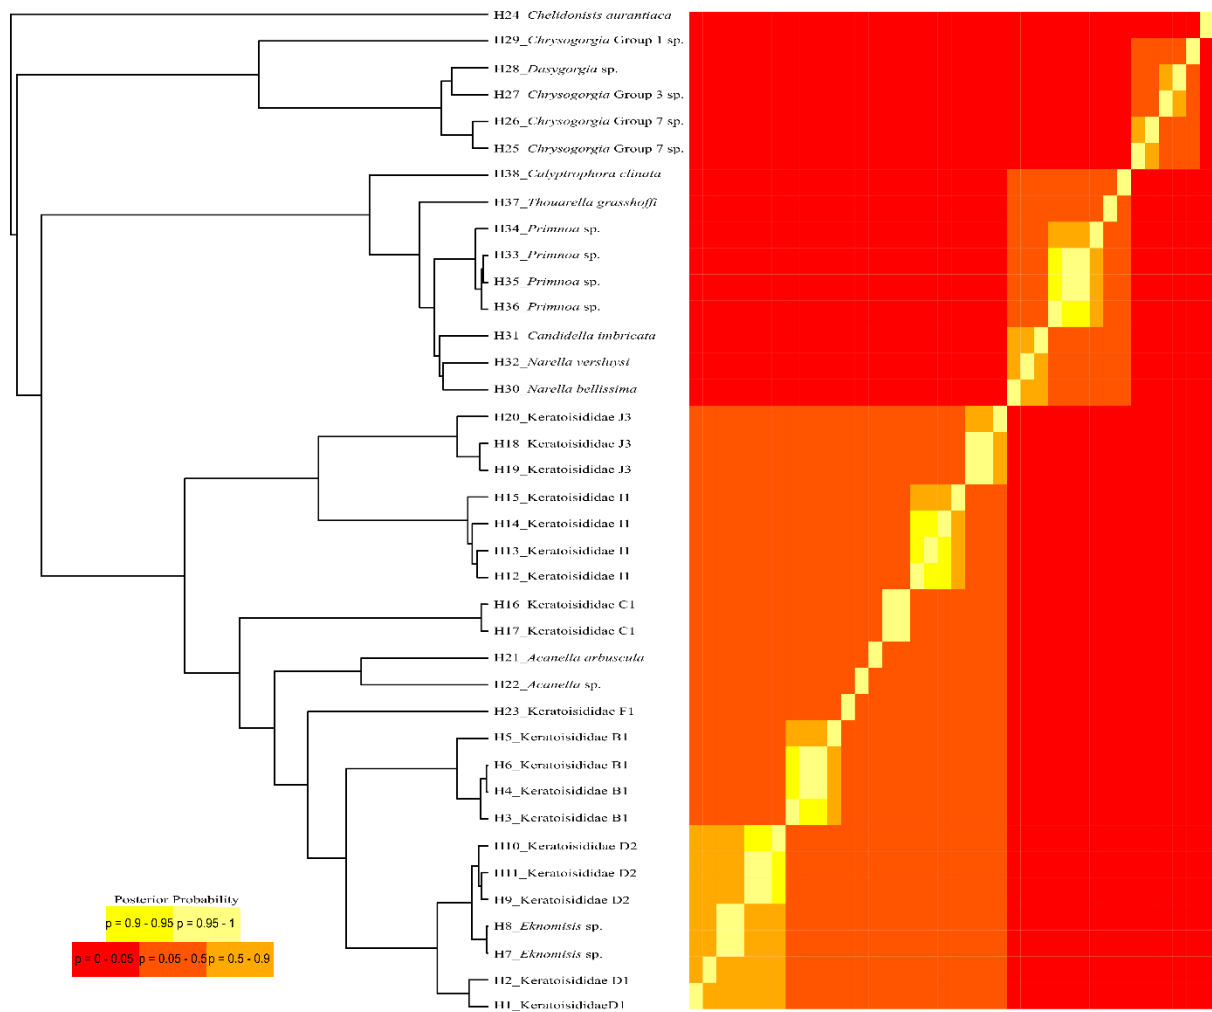

Figure S50. bGYMC species delimitation inference. The heatmap visualises the different species estimates when different posterior probability thresholds are used. A1, B1, C1, D1, D2, F1, I1, and J3 refer the keratoisidid subclades defined by Watling *et al.*, (2022).
